# Supplementary material
Source: PubMed Central journal article supplement (PMC4294627)
Supplement: NIHMS622697-supplement-Supplementary_Table_1_.pdf [file NIHMS622697-supplement-Supplementary_Table_1_.pdf]

| gene name | PC2 loading |
|-----------|-------------|
| LHX9      | 0.10920525  |
| TBX5      | -0.1088585  |
| SOX10     | -0.1028642  |
| DIO2      | -0.0779637  |
| RUNX1     | -0.0740156  |
| NFIX      | -0.0736935  |
| DCN       | -0.073581   |
| OGN       | -0.0730462  |
| SMOC2     | -0.068769   |
| AGTR2     | -0.0685502  |
| INHBA     | -0.0666095  |
| SPOCK2    | -0.0657349  |
| LAMA3     | -0.0634471  |
| FGF18     | -0.0633952  |
| DCC       | -0.062873   |
| FAM84A    | -0.0626492  |
| NCAM2     | -0.0624869  |
| EFEMP1    | -0.0623186  |
| BMPER     | -0.0615082  |
| GFRA3     | -0.060607   |
| ZBTB16    | 0.06032597  |
| SCEL      | -0.059207   |
| DKK2      | -0.0581787  |
| LIN28A    | 0.0568595   |
| TNC       | -0.0562007  |
| PALMD     | -0.0556153  |
| ADAM22    | -0.0556069  |
| PLA2G7    | -0.0547844  |
| FRMPD1    | -0.0545663  |
| GATA2     | -0.0532878  |
| ABI3BP    | -0.0532705  |
| EYA4      | -0.0527534  |
| ODZ2      | -0.0512312  |
| RORB      | -0.0499457  |
| MEGF10    | -0.0498751  |
| EGFLAM    | -0.0496211  |
| GFRA1     | -0.0494022  |
| C1QTNF7   | -0.048946   |
| NRG1      | -0.0484195  |
| EMX2      | 0.04785654  |
| BARX2     | -0.0477821  |

|          |            |
|----------|------------|
| KLF5     | -0.047457  |
| FAM163A  | -0.0471193 |
| ISL1     | -0.0468371 |
| IGDCC3   | 0.04667665 |
| GRIA2    | -0.0465123 |
| MOXD1    | -0.0464629 |
| KCTD12   | -0.0462218 |
| THBS2    | -0.0456907 |
| RORA     | -0.0454286 |
| TFAP2B   | -0.0453028 |
| GABRA4   | -0.0452934 |
| TRIM71   | 0.04518835 |
| PPFIA2   | -0.0449201 |
| LIN28B   | 0.04394478 |
| WNT11    | -0.0439227 |
| HOXD13   | -0.0438206 |
| PRR16    | -0.0435757 |
| IGFBP7   | -0.0426626 |
| RET      | -0.0425902 |
| NFIB     | -0.0421487 |
| PITX1    | 0.04214131 |
| PLP1     | -0.0420782 |
| UPK1B    | -0.0420142 |
| FAT4     | -0.0420085 |
| PKDCC    | 0.04196486 |
| HTRA1    | -0.0419038 |
| ARHGAP20 | -0.0418833 |
| TMPRSS2  | -0.0418506 |
| SOST     | 0.041805   |
| HLF      | -0.0414609 |
| MAPK10   | -0.0408693 |
| SLC16A14 | -0.0406602 |
| PPP1R3B  | -0.0406179 |
| GPR176   | -0.0406107 |
| CDH4     | -0.0405639 |
| RSPO3    | -0.040423  |
| PPARGC1A | -0.0401485 |
| POSTN    | -0.0401322 |
| GSG1L    | -0.0400433 |
| KEL      | -0.0399599 |
| GJB2     | -0.0398876 |
| DACT1    | -0.0398508 |

|          |            |
|----------|------------|
| ATP2A1   | -0.0398393 |
| WNT9B    | -0.0397854 |
| NRCAM    | -0.0396399 |
| NTNG1    | -0.03951   |
| CDH10    | -0.0394986 |
| VGLL3    | -0.0394909 |
| LRRC4B   | -0.039433  |
| CLSTN2   | -0.0392126 |
| LGR5     | -0.0391641 |
| NCAN     | -0.0390928 |
| SERINC2  | -0.0389803 |
| KIF1A    | -0.0389227 |
| NTN4     | -0.0389193 |
| DHRS3    | -0.0389129 |
| DPP6     | -0.038886  |
| DUSP6    | 0.03876798 |
| TLL1     | -0.0386369 |
| TMEFF2   | -0.0383175 |
| RUNX2    | -0.0382652 |
| FLRT2    | -0.0381668 |
| WNT3     | -0.0379922 |
| HOXA13   | -0.037832  |
| SLC16A9  | -0.0374505 |
| SPOCK3   | -0.0373609 |
| GUCY1A3  | -0.0371667 |
| OPCML    | -0.0367094 |
| TMEM200A | -0.0366817 |
| FAH      | 0.03664955 |
| APC2     | -0.0365575 |
| STAB2    | 0.03652156 |
| CFTR     | -0.0365191 |
| TMEM132E | -0.0363649 |
| OSR1     | -0.0361378 |
| ACTC1    | -0.0360865 |
| NDRG2    | -0.0359054 |
| LMO4     | -0.0359053 |
| SYT1     | -0.0358728 |
| NPR3     | -0.0358124 |
| COL12A1  | -0.035787  |
| GPR126   | -0.0357411 |
| DKK3     | -0.035699  |
| ADCY2    | -0.0355651 |

|         |            |
|---------|------------|
| LIN7A   | -0.0354921 |
| ANO9    | -0.0354672 |
| SALL4   | 0.03531861 |
| MAMLD1  | -0.0352965 |
| HHIP    | -0.0352955 |
| CLDN8   | -0.0351209 |
| CLU     | -0.0349812 |
| MAGI2   | -0.034855  |
| PI15    | -0.0348028 |
| TMEM26  | -0.0347968 |
| EDNRB   | -0.0345688 |
| SEMA5B  | -0.0345129 |
| NGFR    | -0.0344757 |
| NIPAL2  | -0.0344575 |
| NCKAP5  | -0.0343804 |
| PAPPA2  | -0.0343501 |
| ELAVL4  | -0.0342841 |
| EDN1    | -0.0342075 |
| KCNJ2   | -0.0342016 |
| CHRD    | -0.0341952 |
| ITGB4   | -0.0341434 |
| FLRT1   | -0.03414   |
| PLXNA4  | -0.0341013 |
| ASTN2   | -0.0340434 |
| SH3RF2  | -0.0339901 |
| SCUBE1  | 0.03396944 |
| EDARADD | -0.0339378 |
| CLDN10  | 0.03392697 |
| BATF    | -0.0339147 |
| NOG     | -0.0339092 |
| PODN    | -0.0338576 |
| TXLNB   | -0.0337623 |
| SOSTDC1 | -0.0336983 |
| LANCL3  | -0.0336643 |
| SEMA3C  | -0.0334827 |
| FAM46A  | -0.0334781 |
| ROBO2   | -0.0333926 |
| FRY     | -0.0332837 |
| ASTN1   | -0.0331483 |
| PTCHD1  | -0.0330475 |
| PAK7    | -0.0330359 |
| DNAJC6  | -0.0328887 |

|         |            |
|---------|------------|
| EPHA5   | -0.0328668 |
| ITIH2   | -0.0327892 |
| LUM     | -0.0327416 |
| RTN4R   | -0.0327332 |
| CHD3    | -0.0326996 |
| TMEM35  | -0.0326768 |
| ILDR1   | -0.0326218 |
| EYA1    | -0.0325653 |
| RRP9    | 0.03256069 |
| EGFL6   | -0.0325258 |
| PDGFD   | -0.032399  |
| PITX2   | -0.0323067 |
| SSH3    | -0.0322912 |
| MASP1   | -0.0322111 |
| MALL    | -0.0321961 |
| LGR6    | -0.0321353 |
| POF1B   | -0.0321022 |
| EDAR    | 0.03194009 |
| STC1    | -0.0319078 |
| FGF13   | -0.0318407 |
| THSD7A  | -0.0317689 |
| NEBL    | -0.0317538 |
| EMP1    | -0.0316221 |
| GCNT1   | -0.0315086 |
| GRHL1   | -0.031472  |
| IGSF10  | -0.0314361 |
| GRIA3   | -0.0312135 |
| DLG2    | -0.0311484 |
| STK32A  | -0.0309722 |
| GPR56   | -0.0309035 |
| CPNE8   | -0.0307775 |
| SCRN1   | -0.0307763 |
| CACNA1D | -0.0307336 |
| ABLIM3  | -0.030615  |
| ATG10   | -0.0305361 |
| TBX15   | 0.03042486 |
| MSX1    | 0.03041555 |
| CPM     | -0.0303746 |
| UBE2QL1 | -0.0303269 |
| TMEM45A | -0.0302467 |
| AVIL    | -0.0301788 |
| CTNND2  | -0.0301704 |

|         |            |
|---------|------------|
| PIK3R1  | -0.0300713 |
| BNC2    | -0.0300477 |
| DOK5    | -0.0299761 |
| COL6A2  | -0.0299667 |
| S100A11 | -0.0299385 |
| DTX1    | -0.0299136 |
| SPRY4   | 0.02985453 |
| PYROXD2 | -0.029851  |
| SLC1A2  | -0.0297015 |
| MYH14   | -0.029678  |
| HOXD10  | 0.02966456 |
| EPHA7   | -0.0296349 |
| PAPPA   | -0.0296315 |
| IRX4    | -0.029564  |
| SLCO2A1 | -0.0294948 |
| ADD2    | -0.0294353 |
| PLAT    | -0.0294067 |
| ENTPD1  | -0.0293981 |
| HIF3A   | -0.0293691 |
| LAMA2   | -0.0293623 |
| FAT3    | -0.029344  |
| ATP8B1  | -0.0292868 |
| PDE1C   | -0.029247  |
| PRSS35  | -0.0292434 |
| OGFRL1  | -0.0292318 |
| LRRN1   | -0.0291833 |
| SEMA3D  | -0.028971  |
| KNDC1   | -0.0289162 |
| IDS     | -0.0288789 |
| ENPP1   | -0.0287909 |
| LTBP3   | -0.0287513 |
| KLF9    | -0.0286973 |
| ALX4    | 0.02868863 |
| EBF2    | -0.0286436 |
| RAB3C   | -0.0285871 |
| SALL3   | 0.02858512 |
| TCP11L2 | -0.0285841 |
| MAOA    | -0.0285772 |
| IRX1    | -0.0285724 |
| BCL11A  | -0.0285033 |
| KCNAB1  | -0.0284337 |
| COL1A2  | -0.0283877 |

|          |            |
|----------|------------|
| CACNG4   | -0.0283092 |
| TSEN54   | 0.02825167 |
| DSP      | -0.0281774 |
| OLFM2    | -0.0281715 |
| TNS4     | -0.0281002 |
| OLFML3   | -0.0280027 |
| COL17A1  | -0.027871  |
| NPAS3    | -0.0278268 |
| SEMA4F   | -0.0278199 |
| MFSD6    | -0.0276683 |
| HOXD12   | -0.0275758 |
| TBX18    | 0.0275622  |
| MARVELD3 | -0.0275562 |
| NR6A1    | 0.02753946 |
| SLC44A5  | -0.027501  |
| NCOA1    | -0.0274835 |
| AFAP1L2  | -0.0274758 |
| FAAH     | -0.0274342 |
| FAM83C   | -0.0274009 |
| NPNT     | -0.0273796 |
| DENND2C  | -0.0272673 |
| GGT5     | -0.0272327 |
| SLC14A1  | -0.0271591 |
| WNT6     | -0.0271206 |
| FAP      | -0.0270248 |
| CHSY3    | -0.0269998 |
| ENO4     | 0.02696175 |
| PLXDC2   | -0.0268794 |
| TOX      | -0.0268106 |
| LSP1     | -0.0267937 |
| CHRNA4   | -0.0267671 |
| DUSP5    | 0.02669658 |
| HOXA11   | 0.02668466 |
| SDK1     | -0.0266834 |
| LZTS1    | -0.0266503 |
| INPP4B   | -0.0265726 |
| MAPT     | -0.0265612 |
| HOXC8    | 0.02649419 |
| FAM150B  | -0.0264853 |
| OLFML1   | -0.0264596 |
| NDST3    | -0.0264524 |
| GREM1    | 0.0264403  |

|         |            |
|---------|------------|
| TCF7    | 0.02640371 |
| MREG    | -0.0264002 |
| WNT9A   | -0.0263968 |
| STC2    | 0.02639    |
| PLEKHG1 | -0.0263295 |
| AHCY    | 0.02627989 |
| MEOX1   | 0.02627181 |
| GALNTL6 | -0.0262184 |
| LRRC18  | -0.0262119 |
| CHRD1   | 0.02620904 |
| SLCO5A1 | -0.0261788 |
| HOXB6   | 0.02608274 |
| MYOF    | -0.0260632 |
| MKX     | -0.0260238 |
| REPS2   | -0.0260047 |
| IRS4    | -0.0259674 |
| SCN3A   | -0.0259453 |
| LDHA    | 0.02590256 |
| CDH18   | -0.0258992 |
| ABCA1   | -0.0258715 |
| RUNDC3B | -0.0258637 |
| DST     | -0.0258154 |
| CACNA1G | -0.0258053 |
| PROX1   | -0.0257784 |
| EPS8    | -0.025778  |
| ACSS3   | -0.0257775 |
| DTNA    | -0.0257709 |
| CCDC85A | -0.0257015 |
| COL6A1  | -0.0256048 |
| RGS16   | -0.0255956 |
| SULF1   | -0.0255904 |
| SGIP1   | -0.0255883 |
| NR3C1   | -0.0255455 |
| EGFR    | -0.0255023 |
| KCNMB4  | -0.0254871 |
| SYT17   | -0.0254658 |
| ANGPTL1 | -0.025354  |
| KCNT2   | -0.0253023 |
| FRMD5   | -0.0252783 |
| CPXM1   | -0.0252453 |
| PHYHIPL | -0.0252452 |
| ANXA2   | -0.025239  |



|          |            |
|----------|------------|
| ADAMTS17 | -0.0251896 |
| PRKAA2   | -0.0251746 |
| HOXB2    | 0.02514494 |
| SLC24A3  | -0.0250916 |
| WNT7B    | -0.0250755 |
| SLC6A4   | -0.0250743 |
| DEPTOR   | -0.0250663 |
| LMCD1    | -0.025034  |
| ALCAM    | -0.0250268 |
| EIF2C4   | -0.0250193 |
| GRWD1    | 0.02499245 |
| L1CAM    | -0.0249608 |
| NTN3     | -0.0249205 |
| SYT6     | -0.0248691 |
| DLK1     | 0.02483499 |
| TSHZ3    | -0.0248189 |
| DOPEY2   | -0.0247859 |
| APLP1    | -0.0247012 |
| RAB27B   | -0.0246909 |
| DACT2    | -0.0246407 |
| CLIC6    | -0.0245911 |
| KLHL23   | -0.0245594 |
| FRAS1    | -0.0245538 |
| LRRC15   | -0.0244971 |
| SRGAP3   | -0.0244904 |
| WFIKKN1  | 0.02441397 |
| CADPS2   | -0.0244118 |
| MBD2     | -0.0243175 |
| ACE      | -0.0243084 |
| FAM107A  | -0.0242745 |
| AIM1L    | -0.024266  |
| NPR1     | 0.02418235 |
| PRR15L   | -0.0241361 |
| PTPRE    | -0.0240993 |
| TNIK     | -0.0240925 |
| FHDC1    | -0.0240887 |
| TMEM169  | -0.0240858 |
| MRAS     | -0.0240681 |
| ATXN1    | -0.0240334 |
| CACNB1   | -0.0239989 |
| MAST1    | -0.0239837 |
| BTG1     | -0.0239512 |

|         |            |
|---------|------------|
| SLAIN1  | -0.0239449 |
| ROBO1   | -0.0239059 |
| RAPGEF3 | 0.02388293 |
| KLF4    | -0.023861  |
| KIF5A   | -0.0238388 |
| ITGA2B  | -0.0238173 |
| TOM1L1  | -0.0237843 |
| LPHN3   | -0.0237793 |
| FBLN5   | -0.0237696 |
| FOSL2   | -0.0237493 |
| LRRC9   | -0.0237003 |
| CNTFR   | -0.0236567 |
| CD200   | -0.0236344 |
| NRBP2   | -0.0236234 |
| FOXP1   | -0.0235772 |
| TNNT2   | -0.023572  |
| LRGUK   | 0.02355618 |
| NAAA    | 0.02354218 |
| SRPX    | -0.0235276 |
| PTGR1   | -0.0235228 |
| GABRB2  | -0.0235037 |
| WDR86   | -0.0234556 |
| CNTN5   | -0.0234437 |
| LGI4    | -0.023435  |
| CSPG4   | -0.0233924 |
| TTBK1   | -0.0233824 |
| FAM124B | 0.02329177 |
| ALAS2   | -0.0232357 |
| MPPED2  | -0.0231622 |
| UCK2    | 0.02315514 |
| FBXO32  | -0.0231295 |
| DPP4    | -0.0231227 |
| SLC37A1 | -0.0231201 |
| FUT9    | -0.0230361 |
| SYTL1   | -0.0230187 |
| DDIT4   | -0.0229034 |
| CDKL2   | -0.022889  |
| FGD3    | -0.0228413 |
| AKAP6   | -0.0228232 |
| MYCL1   | -0.0227899 |
| UNC5D   | -0.0226527 |
| GAB3    | -0.0226345 |

|         |            |
|---------|------------|
| CCNE1   | 0.0226239  |
| SPP1    | -0.0226198 |
| GAL3ST3 | -0.0225669 |
| INF2    | -0.0225618 |
| ADCY8   | -0.0225273 |
| PTPRD   | -0.0224879 |
| CRMP1   | 0.02247219 |
| COL3A1  | -0.0224689 |
| MXD1    | -0.0224524 |
| LOXL2   | -0.0224399 |
| GXYLT2  | -0.022425  |
| LRRK1   | -0.0224085 |
| SORBS2  | -0.0224033 |
| TH      | -0.0223897 |
| CIDEB   | 0.02234859 |
| ASNS    | 0.02234775 |
| CDS1    | -0.0223297 |
| POU6F1  | -0.0222925 |
| ZBTB20  | -0.0222924 |
| PODXL2  | -0.0222782 |
| RNF182  | -0.0222368 |
| PCDH1   | -0.0222221 |
| PLS3    | -0.0222091 |
| GTF2H4  | 0.02220529 |
| GRIN3A  | -0.0221883 |
| TPPP    | -0.0221795 |
| ELOVL7  | -0.0221523 |
| BCAT1   | 0.02215101 |
| NEDD4L  | -0.0221496 |
| NCAM1   | -0.0221242 |
| MGAT3   | -0.0221031 |
| F3      | -0.0219966 |
| ZHX2    | -0.0219882 |
| AGL     | -0.021986  |
| SYT16   | -0.0219778 |
| PAPSS2  | -0.021965  |
| TLR5    | -0.021933  |
| TMUB1   | -0.0219059 |
| CADPS   | -0.0218853 |
| DTX3L   | -0.0218724 |
| PKP2    | -0.0218618 |
| CEP70   | -0.0218029 |

|          |            |
|----------|------------|
| KCNK2    | -0.021798  |
| FZD6     | -0.0217579 |
| NOD1     | -0.0216526 |
| TIMP2    | -0.0216503 |
| THG1L    | 0.02164983 |
| LYPD6    | -0.0216471 |
| CACNB3   | -0.0215849 |
| RIPK4    | -0.02158   |
| ID4      | -0.0215771 |
| SLC22A23 | -0.0215402 |
| SLC46A3  | -0.0214394 |
| PKP1     | -0.0214151 |
| CTH      | 0.02141158 |
| PAOX     | 0.02140756 |
| PALM2    | -0.0213874 |
| MCOLN2   | 0.02136784 |
| ETV5     | 0.02133816 |
| TSNAXIP1 | 0.02131462 |
| FAM19A2  | -0.0212998 |
| ADCY1    | -0.0212752 |
| LYL1     | -0.0212577 |
| PHF5A    | 0.02123746 |
| WDR4     | 0.02121051 |
| GNAO1    | -0.0212043 |
| PARP9    | -0.0211957 |
| PLCD3    | -0.0211944 |
| MYLK     | -0.0211943 |
| ATP2B4   | -0.0211893 |
| FOXP2    | -0.0211461 |
| EPPK1    | -0.0211236 |
| PSAT1    | 0.02108992 |
| PPARA    | -0.0210828 |
| SSPN     | -0.0210652 |
| MAOB     | -0.0210563 |
| KDELR3   | -0.0210231 |
| COL7A1   | -0.0210214 |
| MPP3     | 0.02101056 |
| CRTAC1   | -0.0209952 |
| MEGF9    | -0.020928  |
| PPP2R3A  | -0.020908  |
| ANK1     | -0.0208862 |
| BNIPL    | -0.0208683 |

|          |            |
|----------|------------|
| PNRC1    | -0.0208187 |
| ELF5     | -0.0207961 |
| WWC1     | -0.020796  |
| DTX4     | -0.0207918 |
| PCDH9    | -0.0207827 |
| SMPDL3A  | -0.0207217 |
| KCNG1    | 0.02069286 |
| FZD4     | 0.02066967 |
| CYBRD1   | -0.0206409 |
| PLBD1    | -0.0206377 |
| ABCA4    | 0.02062452 |
| GNAZ     | -0.0206195 |
| FAT2     | -0.0205895 |
| FAM63B   | -0.020566  |
| HMCN1    | -0.0205602 |
| DRP2     | -0.0205589 |
| PLEK2    | -0.0205289 |
| ANXA4    | -0.0205279 |
| CAMK1D   | -0.0205202 |
| GPD1     | 0.02049057 |
| KCNK1    | -0.0204703 |
| TRIM62   | -0.020461  |
| LRRC47   | 0.02045504 |
| EDIL3    | -0.0204435 |
| TMPRSS13 | -0.0204416 |
| MXD4     | -0.0204111 |
| CDK19    | -0.0203898 |
| CHURC1   | -0.020388  |
| JUN      | -0.0203751 |
| SRCIN1   | -0.0203691 |
| SCAI     | -0.0203676 |
| PGM5     | -0.020364  |
| KDR      | 0.02035707 |
| TRIM2    | -0.0203274 |
| TDRD1    | -0.0203237 |
| BAIAP2L2 | -0.0203232 |
| IGFBP4   | -0.020279  |
| GJA5     | 0.02024285 |
| ARAP2    | -0.0202095 |
| SAT1     | -0.0202049 |
| CDC42EP1 | 0.02015021 |
| IL17RE   | -0.0201431 |

|          |            |
|----------|------------|
| BAI3     | -0.0201426 |
| ZBTB4    | -0.0200812 |
| GHR      | -0.020075  |
| SLC9A9   | -0.0200445 |
| SNAI1    | 0.02003194 |
| ENDOD1   | -0.0200295 |
| LMO7     | -0.0199897 |
| ARHGEF25 | -0.0199862 |
| GPR85    | -0.019961  |
| SRL      | -0.0199402 |
| MAP3K6   | -0.0198972 |
| NGF      | -0.0198756 |
| ARHGEF26 | -0.0198626 |
| CTTNBP2  | -0.0198576 |
| CALD1    | -0.0198498 |
| OBSL1    | -0.0198433 |
| CBLC     | -0.0198413 |
| EPS8L2   | -0.0198278 |
| MAML2    | -0.0198068 |
| TXNIP    | -0.0197672 |
| UNC5C    | -0.0197631 |
| LRRC17   | -0.0197527 |
| ELF1     | -0.0197023 |
| KCNN3    | -0.0196889 |
| PRRT2    | -0.0196826 |
| NANOS1   | -0.0196688 |
| ZNF512B  | -0.0196253 |
| SH3GL3   | -0.0196004 |
| SMARCC2  | -0.0195923 |
| DLX4     | 0.01957518 |
| PDK4     | -0.0195661 |
| SPATS2L  | -0.0195211 |
| PPP1R3D  | -0.0195187 |
| EYA2     | -0.0195164 |
| PCMTD1   | -0.0194813 |
| BMPR2    | -0.0194673 |
| EXPH5    | -0.0194451 |
| HYAL1    | -0.0194354 |
| PCDH7    | -0.0194341 |
| SPOCK1   | -0.0194147 |
| NR3C2    | -0.0194063 |
| PFN2     | -0.0193898 |

|          |            |
|----------|------------|
| ARID5B   | -0.0193655 |
| GABRA3   | -0.0193595 |
| GPR137C  | -0.0193204 |
| NOP2     | 0.01930197 |
| PPL      | -0.0192817 |
| PCOLCE2  | 0.0192633  |
| EBF4     | -0.0192412 |
| SLC26A10 | 0.01916276 |
| PPFIA3   | -0.019159  |
| HINT2    | -0.0191391 |
| GRHL3    | -0.0191222 |
| PDZD2    | -0.0191152 |
| METRNL   | 0.01910542 |
| PPAPDC2  | -0.0190981 |
| ARHGAP24 | -0.019095  |
| CALCOCO1 | -0.0190766 |
| NTM      | -0.0190508 |
| CACNA1H  | -0.0190358 |
| CAMTA1   | -0.0190294 |
| CUX1     | -0.0190107 |
| NPR2     | -0.0190093 |
| SDC2     | -0.0190063 |
| SLC35F1  | -0.0189848 |
| ITGB8    | -0.0189845 |
| CYSLTR1  | 0.01897336 |
| PDK2     | -0.0189714 |
| PCDH17   | -0.0189498 |
| CASZ1    | -0.0189456 |
| RHAG     | -0.0189329 |
| PHB      | 0.0189196  |
| TMED1    | 0.0189116  |
| RPH3AL   | -0.0188907 |
| NUDT1    | 0.01888219 |
| EFR3A    | -0.0188734 |
| CAPN1    | -0.0188645 |
| PPAT     | 0.01885268 |
| LTBP1    | -0.0188449 |
| PSMB5    | 0.01882972 |
| FBXL7    | -0.0188188 |
| HYAL3    | -0.0188087 |
| GRASP    | -0.0187984 |
| APH1B    | -0.018754  |

|          |            |
|----------|------------|
| ZBTB8A   | -0.0187129 |
| SPATA17  | 0.01869119 |
| RAB3D    | -0.0186803 |
| FMN2     | -0.0186648 |
| PRKG1    | -0.0186602 |
| LRRIQ3   | 0.01865215 |
| PTK2B    | -0.0186485 |
| CRYL1    | -0.0186483 |
| EMILIN3  | -0.0186375 |
| GEM      | -0.0186309 |
| NOVA1    | -0.0186234 |
| ANKRD35  | -0.01861   |
| ATP8A1   | -0.0185736 |
| MFAP4    | -0.0185409 |
| ABHD3    | -0.0185319 |
| WNT4     | -0.0185192 |
| TUBB4A   | -0.0185187 |
| BTBD19   | 0.01851523 |
| PLA2G16  | -0.0185001 |
| PKP3     | -0.0184965 |
| RABGAP1L | -0.0184731 |
| TAL1     | -0.018472  |
| MAP3K9   | -0.0184435 |
| SNCAIP   | -0.0184339 |
| TMTC2    | -0.0184019 |
| CDC37    | 0.01839805 |
| FAM160B2 | -0.0183819 |
| PSMG3    | 0.01836854 |
| CRIM1    | -0.018365  |
| RCC1     | 0.01835529 |
| CLK4     | -0.0183464 |
| JAM2     | -0.0183429 |
| TTLL11   | -0.0183372 |
| SLC30A4  | -0.0183218 |
| SVIL     | -0.0182668 |
| MAPK12   | 0.01822721 |
| HBP1     | -0.0182237 |
| FAM59A   | -0.0182154 |
| MYCN     | 0.01819112 |
| MAPK4    | -0.0181894 |
| NFE2L3   | -0.0181818 |
| GNAT2    | 0.01816306 |



|          |            |
|----------|------------|
| TMEM178  | -0.018161  |
| RDH14    | -0.0181553 |
| PFKFB2   | -0.0181529 |
| ELMOD1   | -0.0181454 |
| CPT1A    | -0.0181272 |
| HSPB8    | -0.0181115 |
| RHOB     | -0.0181111 |
| HSPA12B  | -0.0180483 |
| CNP      | -0.0180437 |
| ABLIM2   | -0.0180383 |
| ANKRD50  | -0.0180367 |
| SDK2     | -0.0180139 |
| ADAMTS7  | -0.0179946 |
| ARHGEF3  | -0.0179815 |
| LAMB2    | -0.0179805 |
| RIMS2    | -0.0179702 |
| EIF3D    | 0.01796808 |
| CD40     | -0.01795   |
| C1QL3    | -0.0178965 |
| PLD1     | -0.0178817 |
| ADAMTS16 | 0.01784802 |
| SYNPO    | -0.0178251 |
| CAMK4    | -0.0178105 |
| RHBDL3   | -0.017802  |
| TNNT3    | -0.0177975 |
| SOBP     | -0.0177879 |
| SNAI2    | -0.0177719 |
| AIG1     | -0.0177544 |
| STARD5   | -0.0177388 |
| ANO4     | -0.0176979 |
| SYN3     | -0.0176941 |
| RNF152   | -0.0176938 |
| CPEB4    | -0.0176753 |
| FKBP4    | 0.01766834 |
| HOXC6    | 0.01766631 |
| CYP7B1   | -0.0176625 |
| HS6ST3   | -0.0176393 |
| PLA2G4A  | -0.0176374 |
| GM2A     | -0.0176336 |
| STX7     | -0.0176221 |
| PHF15    | -0.0176175 |
| DAAM2    | -0.0176174 |

|         |            |
|---------|------------|
| OLFML2B | -0.0176169 |
| VLDLR   | -0.0175826 |
| CECR2   | 0.01757668 |
| RAN     | 0.01757458 |
| GSTA4   | -0.0175668 |
| CBX6    | -0.0175309 |
| MED12L  | -0.0175286 |
| SYNPO2  | -0.0175243 |
| NUDT7   | -0.0175195 |
| AP1M2   | -0.017509  |
| CCDC68  | -0.0175079 |
| RUSC2   | -0.0175009 |
| FAM134B | -0.0174837 |
| CBS     | 0.01747666 |
| DCPS    | 0.01746916 |
| APOB    | 0.01744198 |
| ACPT    | 0.01743931 |
| HOXB7   | 0.01742254 |
| SDAD1   | 0.01741484 |
| GRINA   | -0.0174141 |
| PRUNE2  | -0.0174005 |
| NASP    | 0.0173638  |
| ODZ4    | -0.0173613 |
| PARP12  | 0.01734967 |
| CHRNA2  | -0.0173408 |
| PDLIM3  | -0.0173378 |
| YPEL5   | -0.0173344 |
| HOXC5   | 0.01732553 |
| ENO2    | -0.0173202 |
| ITGA2   | -0.0173151 |
| SLC29A4 | -0.0173082 |
| RIMS1   | -0.0172989 |
| EML6    | -0.0172956 |
| NEDD9   | -0.0172919 |
| LPL     | 0.01727036 |
| RAD51   | 0.0172654  |
| NAV2    | -0.0172613 |
| ADAMTS5 | -0.0172593 |
| MVP     | -0.0172529 |
| ARHGEF9 | -0.0172484 |
| NELL2   | -0.0172361 |
| TCN2    | -0.0172335 |

|          |            |
|----------|------------|
| TFAP2C   | 0.01723124 |
| CHST1    | -0.0172252 |
| CLDN23   | -0.0172244 |
| ODZ3     | -0.0172186 |
| CORO1A   | 0.01720971 |
| RNF11    | -0.0172092 |
| DPH1     | 0.01720813 |
| SHROOM1  | -0.0171941 |
| STX1B    | -0.0171798 |
| NHEJ1    | 0.01716098 |
| SDHC     | 0.01714807 |
| FERMT1   | -0.0171339 |
| SLC44A3  | -0.0171317 |
| SESN3    | -0.0171312 |
| EDNRA    | -0.0171034 |
| PLCL1    | -0.0170846 |
| SNTB1    | -0.0170635 |
| GRIK1    | -0.0170605 |
| SGCD     | -0.0170405 |
| DOCK8    | -0.0170245 |
| CHCHD6   | 0.01698149 |
| MEIS2    | -0.0169663 |
| WDR3     | 0.01696441 |
| PTCH1    | -0.016959  |
| SYT9     | -0.0169558 |
| DBNDD2   | -0.0169431 |
| CPE      | -0.016915  |
| DCAF6    | -0.016906  |
| MEF2C    | -0.0168961 |
| B4GALT4  | -0.0168729 |
| KCND1    | -0.0168602 |
| CDC42BPG | -0.0168514 |
| POU2F2   | -0.0168376 |
| ZDHHC24  | -0.0168371 |
| PTPN3    | -0.016827  |
| MAPRE3   | -0.0167883 |
| MFSD11   | -0.0167783 |
| SLC27A4  | -0.0167708 |
| SCN4B    | 0.01676343 |
| OXR1     | -0.0167623 |
| SOX8     | 0.01674696 |
| IGFBP3   | -0.0167469 |

|          |            |
|----------|------------|
| FGFR2    | -0.0167462 |
| MAP3K5   | -0.0167377 |
| NEK2     | 0.01673172 |
| MYO1D    | -0.0167206 |
| FOXO1    | -0.0166719 |
| SPRY1    | 0.016669   |
| ARG2     | -0.0166627 |
| CCDC106  | -0.0166499 |
| FAM167A  | -0.0166493 |
| ST8SIA1  | -0.0166339 |
| SLC19A1  | 0.01662621 |
| SHANK1   | -0.0166149 |
| GTSE1    | 0.01660201 |
| GALNTL1  | -0.0166012 |
| DNAJB4   | -0.0165977 |
| TSPAN15  | -0.0165791 |
| DCX      | 0.01654639 |
| CACNA2D2 | -0.0164935 |
| RUNX1T1  | -0.0164821 |
| DUSP12   | 0.01646954 |
| FEN1     | 0.01645751 |
| SLC4A3   | -0.0164562 |
| PM20D1   | 0.01643834 |
| EBNA1BP2 | 0.01642767 |
| NR2F1    | -0.0164251 |
| ORC1     | 0.01642294 |
| HOOK1    | -0.0164213 |
| FAM160A1 | -0.0163969 |
| SLC35F2  | 0.01639255 |
| CRTAP    | -0.0163884 |
| HSPA12A  | -0.0163745 |
| PPP1R13B | -0.0163641 |
| LOH12CR1 | 0.01636381 |
| SPIRE2   | -0.0163276 |
| FBN1     | -0.0163224 |
| MTUS1    | -0.0163212 |
| MACC1    | -0.0163097 |
| KCNMA1   | -0.0163035 |
| CDCP1    | -0.0162709 |
| NUDT18   | -0.0162547 |
| SLC40A1  | -0.016244  |
| PDE9A    | -0.0162284 |

|          |            |
|----------|------------|
| STARD3   | 0.01622349 |
| PARL     | 0.01622301 |
| BCHE     | -0.0162126 |
| CD9      | -0.0162082 |
| SHMT1    | 0.01620339 |
| ASXL2    | -0.0161859 |
| ABCC9    | -0.0161607 |
| MAPKAPK3 | -0.016158  |
| ASAP3    | -0.0161579 |
| MYL9     | -0.0161515 |
| MDGA1    | -0.0161366 |
| MRPS35   | 0.01612564 |
| RNF19B   | -0.0161214 |
| NET1     | -0.0161204 |
| BCL6     | -0.0161103 |
| TRERF1   | -0.0160809 |
| JMJD4    | -0.0160771 |
| BTBD11   | -0.0160753 |
| MSRB3    | -0.0160622 |
| MCF2L    | -0.0160608 |
| EFNB2    | -0.0160518 |
| CAPN2    | -0.0160512 |
| SP6      | 0.01604287 |
| COPZ2    | -0.0160414 |
| MRPS23   | 0.01603865 |
| GADD45A  | -0.0160339 |
| GDNF     | -0.0159882 |
| ESRP1    | -0.0159804 |
| GLT8D1   | -0.0159776 |
| DGKA     | -0.0159698 |
| CBX4     | -0.0159498 |
| ZDHHC14  | -0.0159026 |
| WWTR1    | -0.015898  |
| SLC7A8   | -0.0158793 |
| PKM2     | 0.01585144 |
| MPP2     | -0.015848  |
| DNAJC15  | 0.01584753 |
| UNC79    | -0.0158404 |
| ABCG1    | -0.0158253 |
| CNTN1    | -0.0158239 |
| CELSR3   | -0.0158209 |
| WNT2B    | -0.0157896 |

|          |            |
|----------|------------|
| ITSN2    | -0.0157801 |
| PQLC1    | -0.0157695 |
| TBL3     | 0.0157695  |
| ITM2B    | -0.0157627 |
| CDC6     | 0.01575786 |
| KAT2B    | -0.0157303 |
| CDH6     | -0.0157166 |
| NAV3     | -0.0157134 |
| FAM198B  | -0.0157044 |
| RNF180   | -0.0157022 |
| MCTP2    | -0.0156983 |
| LRRC7    | -0.0156854 |
| PCYT1B   | -0.0156763 |
| POPDC2   | 0.01566676 |
| RGS2     | -0.0156311 |
| SPA17    | -0.0156037 |
| LHPP     | 0.01560024 |
| PAK1     | -0.0155986 |
| DSG2     | -0.015585  |
| RNF43    | -0.0155815 |
| STAT6    | -0.015561  |
| SLC4A11  | -0.0155399 |
| QSOX1    | -0.0155376 |
| SMARCA1  | -0.0155197 |
| ENPP3    | -0.0155182 |
| TMC4     | -0.015505  |
| ATP6V0B  | -0.0154892 |
| FBLN2    | -0.0154839 |
| GPR155   | -0.015483  |
| EFHD1    | 0.01547089 |
| CATSPER3 | 0.01544789 |
| PGM2L1   | -0.0154297 |
| FBXO16   | -0.0154296 |
| RBM47    | -0.0154236 |
| NFAT5    | -0.0154207 |
| SEMA4G   | -0.0154128 |
| CCDC150  | 0.01540769 |
| NHP2     | 0.0153928  |
| A2LD1    | 0.01539231 |
| NIP7     | 0.01538227 |
| RRP12    | 0.01535085 |
| MAF1     | -0.0153366 |

|          |            |
|----------|------------|
| CREB3L2  | -0.0153306 |
| PWP2     | 0.01532677 |
| AHNAK    | -0.0152939 |
| KIF13A   | -0.0152663 |
| CYP1B1   | -0.0152633 |
| LRP8     | 0.01526091 |
| FAM174B  | -0.0152595 |
| GNL3     | 0.01525457 |
| PHB2     | 0.01525302 |
| MTMR11   | -0.0152238 |
| EIF3L    | 0.01521214 |
| HINT3    | 0.01520576 |
| STAC2    | 0.01520003 |
| TLE4     | -0.0151995 |
| NTN1     | 0.01518846 |
| TMEM119  | -0.0151779 |
| CELSR1   | -0.0151675 |
| CAMSAP3  | -0.0151658 |
| PHF2     | -0.0151631 |
| MARVELD2 | -0.015162  |
| EFCAB1   | -0.0151583 |
| DPYSL4   | 0.01514612 |
| RIPK2    | -0.0150934 |
| PTPDC1   | -0.0150904 |
| GPNMB    | -0.0150821 |
| LONRF2   | -0.0150771 |
| OLFML2A  | -0.0150617 |
| TMEM51   | -0.0150492 |
| ZMYND10  | 0.01504921 |
| MFSD2A   | 0.0150357  |
| SH3PXD2A | -0.0150312 |
| RBM24    | -0.0150249 |
| NTF3     | -0.015021  |
| CDO1     | -0.0150157 |
| CREM     | -0.015013  |
| TMOD4    | -0.015011  |
| IGLON5   | -0.015005  |
| TBC1D8B  | -0.0149973 |
| ENOX1    | -0.0149839 |
| RELL2    | -0.0149804 |
| JUP      | -0.0149773 |
| QSOX2    | 0.01497244 |

|          |            |
|----------|------------|
| CDON     | 0.01495648 |
| HADH     | 0.0149462  |
| WDR6     | -0.0149431 |
| DFFB     | 0.01493109 |
| RPUSD3   | 0.01492962 |
| TRAIP    | 0.01492421 |
| ATL1     | -0.0148915 |
| FMNL1    | -0.0148633 |
| RHBDF2   | 0.01484637 |
| TKT      | 0.0148324  |
| SGSM2    | -0.014829  |
| FKBP7    | -0.0148264 |
| TMTC1    | -0.0148217 |
| SALL1    | 0.01481774 |
| RORC     | -0.0148112 |
| ATXN7L1  | -0.0148083 |
| COL22A1  | 0.01480778 |
| EXOC6B   | -0.0148075 |
| AKIRIN2  | -0.0148005 |
| NOX4     | -0.0147964 |
| CORO2B   | -0.0147954 |
| GMIP     | 0.01478958 |
| GLRX5    | 0.01478591 |
| RNF150   | -0.0147689 |
| PDRG1    | 0.01476283 |
| PSD3     | -0.0147618 |
| USP2     | -0.0147602 |
| HSPA9    | 0.01475653 |
| SCARA3   | -0.0147345 |
| FOXJ2    | -0.0147329 |
| WAPAL    | -0.0147265 |
| CDCA7    | 0.01471907 |
| CYP27A1  | 0.01470974 |
| PARVA    | -0.0147066 |
| CREB3L1  | -0.0146964 |
| CNBP     | 0.01469616 |
| SLC12A9  | 0.01469275 |
| GABBR1   | -0.0146831 |
| CTGF     | 0.01467444 |
| VAT1     | -0.0146725 |
| CDK5RAP3 | 0.01466186 |
| NME6     | 0.01464929 |



|          |            |
|----------|------------|
| NFKBIA   | -0.0146369 |
| MLF1     | -0.014636  |
| GK5      | 0.01463168 |
| COL11A1  | -0.0146282 |
| MRM1     | 0.01462582 |
| FAM171B  | -0.0146201 |
| FN1      | -0.014599  |
| CDH1     | -0.0145969 |
| HSPD1    | 0.01459562 |
| RPL7L1   | 0.01459408 |
| ALDH1L2  | -0.0145843 |
| PCSK9    | 0.01457854 |
| CDK14    | -0.0145577 |
| MEIS1    | -0.0145554 |
| PRKCA    | -0.0145501 |
| STOX1    | 0.01451093 |
| SNX24    | -0.0145051 |
| CHST2    | -0.0144935 |
| RABGAP1  | -0.014469  |
| ARHGEF15 | 0.01445452 |
| REEP3    | -0.0144452 |
| STON2    | -0.0144416 |
| HAUS1    | 0.01443464 |
| NOL4     | -0.0144334 |
| IFT27    | 0.01443086 |
| LRRC20   | 0.0144239  |
| NHSL2    | -0.0144177 |
| BMP2     | -0.0144021 |
| CCDC148  | -0.0143956 |
| WBSCR27  | -0.0143883 |
| THRB     | -0.0143826 |
| TPM2     | -0.0143716 |
| WDR12    | 0.01436816 |
| GALNT3   | -0.0143631 |
| EZR      | -0.0143506 |
| ARHGEF5  | -0.0143457 |
| PCSK5    | 0.01434255 |
| MPPED1   | -0.0143173 |
| CCDC51   | 0.01430807 |
| CDC45    | 0.01430666 |
| NUDT5    | 0.01430289 |
| OSMR     | -0.0142812 |

|          |            |
|----------|------------|
| GPM6B    | -0.0142777 |
| ATP1B1   | -0.0142563 |
| ABR      | -0.0142562 |
| TGFBI    | -0.0142535 |
| AUTS2    | -0.0142494 |
| DEPDC1B  | 0.01424266 |
| TSPAN2   | -0.0142342 |
| SCRN2    | 0.01422826 |
| SOX5     | 0.01415672 |
| PLK2     | -0.0141406 |
| TAGLN    | 0.01413758 |
| TEC      | -0.0141299 |
| TAF4B    | 0.01412853 |
| TTC27    | 0.01412515 |
| STX3     | -0.0141239 |
| PSMA5    | 0.01411174 |
| ECE1     | -0.0141085 |
| ZBTB34   | -0.0141063 |
| RRP7A    | 0.01409945 |
| COL4A1   | -0.0140931 |
| SCMH1    | -0.0140862 |
| SYNRG    | -0.014076  |
| ADAM12   | -0.0140733 |
| PSD      | -0.0140596 |
| ZSWIM5   | -0.0140582 |
| MMP14    | -0.0140575 |
| CYP39A1  | -0.0140508 |
| NOP16    | 0.01404511 |
| RB1      | -0.0140431 |
| SHQ1     | 0.01404256 |
| GLT8D2   | -0.0140413 |
| RHOC     | 0.01401848 |
| CALM3    | 0.01401649 |
| FAM129A  | -0.0140156 |
| TUSC2    | 0.01401248 |
| FPGS     | 0.01400779 |
| ACTN2    | -0.0140037 |
| GRB7     | -0.0139899 |
| SLC30A10 | -0.0139894 |
| TAOK1    | -0.0139857 |
| SLC25A37 | -0.0139703 |
| HFM1     | -0.0139634 |

|          |            |
|----------|------------|
| TMEM138  | 0.01395916 |
| ITPK1    | 0.01395622 |
| GFER     | 0.01395184 |
| DOCK11   | -0.0139512 |
| APBA1    | -0.0139423 |
| ERBB3    | -0.0139133 |
| KIF18B   | 0.01390859 |
| MEOX2    | 0.01390824 |
| GLDC     | 0.01390665 |
| MAP3K11  | 0.01390324 |
| CAPS2    | -0.0138975 |
| SLC25A33 | 0.01388141 |
| SH3RF3   | -0.0138726 |
| YPEL2    | -0.0138654 |
| SUN2     | -0.013843  |
| TGM1     | -0.0138329 |
| CRYM     | -0.0138219 |
| CAMK2B   | -0.0138181 |
| EIF2AK2  | -0.0138172 |
| TRAPPC6B | -0.0138168 |
| FUT4     | 0.0138166  |
| PTGFRN   | -0.013808  |
| NENF     | -0.0137865 |
| PLCB2    | -0.0137781 |
| PYGL     | -0.0137704 |
| RARA     | -0.0137625 |
| PSMG1    | 0.01375566 |
| GEMIN8   | 0.01375364 |
| SYP      | -0.0137525 |
| POLK     | -0.013752  |
| SEMA6A   | -0.0137489 |
| PITPNM1  | 0.01374378 |
| MAMDC2   | -0.0137345 |
| SMAP1    | -0.0137293 |
| PPP1R16B | 0.01372765 |
| VSTM2B   | -0.0137189 |
| OSBPL3   | -0.013702  |
| NHSL1    | -0.013698  |
| ZCWPW1   | -0.0136945 |
| MDFIC    | -0.013694  |
| TPI1     | 0.01369128 |
| FAM185A  | 0.01366676 |

|            |            |
|------------|------------|
| PRDX6      | 0.01366455 |
| RPS27      | -0.0136545 |
| MITF       | 0.01365276 |
| RPP40      | 0.01363661 |
| NINL       | 0.01363566 |
| PHC2       | -0.0136219 |
| FAM49A     | -0.0136181 |
| CSGALNACT1 | 0.01359684 |
| ADAMTS4    | -0.0135864 |
| KIF26A     | 0.01358241 |
| MPZL2      | -0.0135794 |
| NR2C2      | -0.0135758 |
| TTLL4      | 0.01357546 |
| MMP16      | -0.0135557 |
| NDUFA2     | -0.0135455 |
| POGK       | -0.0135376 |
| GET4       | 0.01353384 |
| DCAKD      | 0.01353206 |
| AGBL3      | -0.0135306 |
| KCNB2      | -0.0135091 |
| FAM120B    | -0.0135045 |
| SLC3A1     | -0.0134974 |
| KCTD13     | 0.01349212 |
| RAB6B      | -0.013491  |
| CRISPLD1   | -0.0134898 |
| MEGF6      | -0.0134793 |
| COL2A1     | -0.0134781 |
| TUBA1C     | 0.0134768  |
| NEXN       | -0.0134756 |
| FXN        | 0.01346567 |
| TULP4      | -0.0134633 |
| CHST15     | -0.0134624 |
| AURKA      | 0.01345585 |
| E2F5       | 0.01345175 |
| TIMM17A    | 0.01344719 |
| RCOR2      | 0.01344651 |
| GRTP1      | 0.01344028 |
| DYNLT3     | -0.013437  |
| TSSC4      | 0.01342543 |
| WWC2       | -0.0134227 |
| RANBP1     | 0.01341984 |
| POP1       | 0.01341584 |

|          |            |
|----------|------------|
| KLF3     | -0.0134002 |
| MXD3     | -0.0133931 |
| SH3RF1   | -0.0133888 |
| MRPL28   | 0.01338058 |
| IRF6     | -0.0133751 |
| ARSA     | -0.0133742 |
| TJP3     | 0.01335994 |
| EIF2B3   | 0.01335495 |
| SMG6     | -0.0133509 |
| RABAC1   | -0.0133499 |
| GLI3     | 0.01334628 |
| FEZ1     | -0.0133397 |
| MALT1    | -0.0133379 |
| ESPL1    | 0.0133123  |
| DMD      | -0.013311  |
| PPM1L    | -0.0133014 |
| SLITRK5  | 0.01327745 |
| MAD2L1BP | 0.01327247 |
| KLF6     | -0.0132676 |
| FAM161A  | -0.01326   |
| IRF2BP1  | -0.0132559 |
| SLC2A10  | -0.0132502 |
| ALG14    | -0.0132454 |
| ANKRD33B | -0.0132373 |
| RAB30    | -0.0132256 |
| FAM134A  | -0.0132235 |
| SARS     | 0.01322127 |
| CDC34    | 0.01321217 |
| IER3     | -0.0132103 |
| COL4A6   | -0.01321   |
| FSTL1    | -0.0132062 |
| DNMT3B   | 0.01320078 |
| FIS1     | 0.01319131 |
| N4BP2L1  | -0.0131889 |
| FZD3     | -0.013184  |
| SIAE     | -0.0131798 |
| PARD6G   | -0.0131604 |
| NUP85    | 0.01314391 |
| SLC2A13  | -0.0131374 |
| TSC22D3  | -0.0131367 |
| RGS17    | -0.0131153 |
| POLR2C   | 0.01310402 |

|          |            |
|----------|------------|
| FBXW5    | -0.0131027 |
| PTN      | -0.0131009 |
| TUFT1    | -0.0130999 |
| VIM      | -0.0130964 |
| ESYT1    | -0.0130958 |
| CRISPLD2 | 0.01309154 |
| RAP1GAP  | -0.0130896 |
| CSF1R    | -0.0130875 |
| IQSEC2   | -0.0130831 |
| SERPINE1 | -0.0130793 |
| ERBB2    | -0.0130737 |
| HAS3     | 0.01307066 |
| CHST11   | -0.0130574 |
| PPDPF    | -0.0130564 |
| TYSND1   | 0.01304495 |
| PRICKLE2 | -0.0130444 |
| OCRL     | -0.0130435 |
| SLC1A5   | 0.01302296 |
| LRRIQ1   | -0.0130193 |
| ZFAND6   | -0.0129976 |
| B3GNT1   | -0.0129947 |
| TBC1D30  | -0.0129867 |
| RRN3     | 0.01298304 |
| ADAM23   | -0.0129751 |
| MMRN2    | 0.01297392 |
| WDR44    | -0.0129682 |
| LONRF1   | -0.0129679 |
| TRADD    | 0.01296258 |
| EVL      | -0.0129595 |
| B3GAT2   | -0.0129589 |
| RERG     | -0.012954  |
| UBE2G2   | 0.01295356 |
| KLHL28   | -0.0129507 |
| RGS10    | -0.0129505 |
| PLA2G12A | 0.01294544 |
| PGAP3    | 0.01293915 |
| SFRP2    | -0.0129382 |
| HPGD     | -0.0129283 |
| CCT5     | 0.01292649 |
| PHYH     | -0.0129185 |
| RGS7BP   | 0.0129144  |
| MYO9A    | -0.0129065 |

|          |            |
|----------|------------|
| SEC24D   | -0.0128967 |
| TOMM22   | 0.01287782 |
| ATP1B2   | -0.0128758 |
| UQCC     | 0.01287064 |
| TMEM106B | -0.012867  |
| PSME1    | -0.012861  |
| SYNM     | -0.0128591 |
| DET1     | 0.012859   |
| NFATC2   | -0.0128582 |
| DDR1     | -0.0128562 |
| COL27A1  | -0.0128413 |
| RC3H2    | -0.0128389 |
| EPM2A    | -0.0128385 |
| RAB32    | -0.0128256 |
| LHFP     | -0.0128235 |
| ARL3     | 0.01282195 |
| ASH1L    | -0.0128144 |
| STK17B   | -0.0127955 |
| FAM63A   | -0.0127948 |
| SNF8     | 0.01279141 |
| DND1     | 0.01278867 |
| CCDC12   | 0.01278363 |
| MRPL2    | 0.01278278 |
| SLC25A4  | -0.0127794 |
| SKIV2L   | -0.0127749 |
| DOK4     | 0.01277451 |
| IGF2     | -0.0127435 |
| PTGES    | -0.0127398 |
| CLSTN3   | -0.0127288 |
| TMEM56   | -0.0127229 |
| RPL7     | 0.01271857 |
| CTPS     | 0.01271821 |
| EPHB1    | -0.0127173 |
| PRICKLE1 | 0.01270415 |
| PREX2    | 0.01270048 |
| INSIG2   | -0.0126972 |
| GUCY1A2  | -0.0126932 |
| TRMT6    | 0.01268234 |
| PYGB     | -0.0126816 |
| CAPN7    | -0.0126794 |
| MUTYH    | 0.012679   |
| ATAT1    | -0.0126735 |

|          |            |
|----------|------------|
| PDGFRL   | -0.0126686 |
| PTRF     | -0.0126676 |
| POLR1A   | 0.01266574 |
| ELF3     | -0.0126573 |
| XPNPEP3  | 0.01265618 |
| GRHL2    | -0.012655  |
| TMEM151B | -0.0126549 |
| CLMN     | -0.0126538 |
| ZC3H7A   | -0.0126489 |
| RNF144B  | -0.0126475 |
| HSPB6    | -0.0126438 |
| PAIP1    | -0.0126437 |
| EFTUD1   | 0.01262766 |
| HECTD2   | -0.0126269 |
| CMPK2    | -0.0126239 |
| GALNT6   | 0.01261967 |
| ANKRD10  | 0.0126148  |
| WIPF3    | -0.0126141 |
| ARID4B   | -0.0126081 |
| PPM1D    | -0.0126057 |
| PDDC1    | 0.01260532 |
| NUDT4    | -0.0125991 |
| TESK2    | -0.0125864 |
| DZIP1    | -0.0125834 |
| C3AR1    | -0.0125798 |
| RELA     | -0.0125702 |
| VWCE     | 0.01256631 |
| CHST3    | -0.0125567 |
| PTGER4   | -0.0125545 |
| AFAP1    | -0.0125496 |
| TMEM180  | 0.0125405  |
| ZFAND5   | -0.012536  |
| CCDC11   | -0.0125344 |
| KLHL17   | -0.0125292 |
| MTBP     | 0.01252619 |
| BTD      | -0.0125193 |
| ADCY9    | -0.0125099 |
| NEO1     | -0.0125091 |
| GOLGB1   | -0.0125066 |
| SREBF1   | 0.01250457 |
| HDAC5    | -0.0124983 |
| NFATC4   | -0.0124968 |



|          |            |
|----------|------------|
| GNG8     | -0.0124963 |
| GTPBP10  | 0.01249554 |
| GALE     | 0.01249369 |
| PDCD11   | 0.01249135 |
| VWA1     | -0.0124884 |
| NTAN1    | -0.0124839 |
| FKBP11   | 0.01248158 |
| CDH2     | -0.0124773 |
| ATPIF1   | -0.0124715 |
| EVI5L    | -0.0124699 |
| PCBP4    | 0.01246731 |
| RASSF7   | -0.0124521 |
| ADAMTS19 | -0.0124439 |
| ARHGEF6  | -0.0124286 |
| TIFA     | -0.0124195 |
| ANKRD6   | -0.0124115 |
| HOXD4    | 0.01240822 |
| PPM1E    | -0.0124077 |
| FTSJ3    | 0.01240419 |
| DUSP4    | 0.01240394 |
| AK5      | 0.01240388 |
| ADCY5    | -0.0124038 |
| CSTB     | -0.0124023 |
| URB1     | 0.01239765 |
| ATXN10   | -0.0123944 |
| ODC1     | 0.01238525 |
| SLIT2    | -0.0123808 |
| ZMAT4    | -0.0123783 |
| CECR5    | 0.01237332 |
| PWWP2B   | -0.0123684 |
| TACO1    | 0.01236312 |
| TFE3     | -0.0123614 |
| ARHGAP19 | 0.01234616 |
| FARSB    | 0.0123367  |
| MRPL20   | 0.01233442 |
| KRTCAP2  | 0.01233232 |
| DAB2     | -0.0123295 |
| MTRF1    | 0.01232823 |
| ERBB2IP  | -0.0123218 |
| DCXR     | -0.0123176 |
| BMPR1A   | -0.0123135 |
| ZBTB46   | 0.01231072 |

|          |            |
|----------|------------|
| HEATR3   | 0.01230544 |
| NID1     | -0.012305  |
| SLC22A15 | -0.0123045 |
| RNMT     | 0.01230274 |
| CREG1    | -0.0122984 |
| TBC1D16  | -0.0122973 |
| FAM73A   | -0.0122972 |
| SETD3    | 0.01228014 |
| DRG2     | 0.01227824 |
| NAT9     | 0.0122763  |
| TEK      | 0.01227514 |
| PPA1     | 0.01227309 |
| AP1S3    | -0.0122706 |
| DARS2    | 0.01226774 |
| IL2RG    | 0.01226746 |
| PGBD5    | -0.0122636 |
| FAM13A   | -0.0122538 |
| JAZF1    | -0.0122466 |
| PPAPDC1B | -0.0122419 |
| PPP1R7   | 0.01223709 |
| FTH1     | -0.0122356 |
| TSEN2    | 0.01223242 |
| MRPS10   | 0.01222286 |
| QPRT     | 0.01221911 |
| OSBPL7   | -0.0122133 |
| TSPAN8   | -0.0122115 |
| PPP1R8   | 0.01220723 |
| SNAP47   | -0.0122023 |
| MFSD10   | 0.01220134 |
| HDAC6    | -0.012198  |
| ANKLE1   | -0.0121958 |
| SLC2A12  | -0.0121863 |
| KLF15    | 0.01216678 |
| BCL2L1   | -0.0121655 |
| MKL2     | -0.0121538 |
| CCNG1    | -0.0121496 |
| EPHA2    | 0.01214763 |
| AIMP2    | 0.01214597 |
| ACTG2    | -0.0121406 |
| S1PR1    | 0.0121308  |
| IQCB1    | -0.0121275 |
| MCEE     | -0.0121265 |

|          |            |
|----------|------------|
| PPARGC1B | -0.012125  |
| FAM117A  | -0.0121248 |
| BICC1    | -0.0121186 |
| COL13A1  | 0.01211255 |
| ARL10    | 0.01211194 |
| TNNI3    | -0.012095  |
| DOK1     | -0.0120838 |
| PCGF1    | -0.0120825 |
| CDC42EP5 | -0.0120793 |
| STRADB   | -0.0120761 |
| SLC46A1  | -0.0120744 |
| MARCKS   | -0.0120587 |
| PARD6A   | -0.0120546 |
| PCDH10   | -0.0120457 |
| TSTA3    | 0.01204478 |
| GPR173   | -0.0120444 |
| CARS     | 0.01202313 |
| ACSL1    | 0.01202088 |
| OSBPL10  | -0.0120167 |
| IL17RA   | -0.0120137 |
| ZFHX2    | -0.0120106 |
| PQBP1    | -0.012007  |
| ALKBH7   | 0.01199916 |
| TNFAIP3  | -0.0119614 |
| CDC42SE2 | 0.01194847 |
| LHFPL3   | -0.0119463 |
| CACNA1B  | -0.0119436 |
| AARS     | 0.01194197 |
| NPM3     | 0.01193553 |
| TDRD3    | -0.0119121 |
| SNED1    | -0.0119109 |
| NFKBIE   | -0.0119108 |
| FHL1     | -0.011907  |
| REEP1    | -0.0119042 |
| RBFA     | 0.01189842 |
| TCOF1    | 0.01189831 |
| FZD2     | -0.0118943 |
| ARNT     | -0.0118759 |
| FAM69A   | -0.011874  |
| ATRN     | -0.0118715 |
| RPS14    | 0.01187013 |
| SPRYD3   | 0.01186658 |

|           |            |
|-----------|------------|
| EPHB6     | -0.0118642 |
| HBXIP     | 0.01185324 |
| CHAF1B    | 0.01184462 |
| GNAI1     | -0.0118363 |
| LNX2      | -0.0118329 |
| DOCK9     | -0.0118288 |
| TANK      | -0.0118283 |
| ACVR2B    | 0.01182817 |
| MAG1      | -0.0118255 |
| RAB11FIP2 | -0.0118199 |
| FAM162A   | -0.0118151 |
| UPF3B     | -0.0118064 |
| BRSK2     | -0.0118014 |
| ENTPD3    | -0.011796  |
| FBXO27    | -0.0117943 |
| IDH3A     | 0.01179275 |
| COL4A2    | -0.0117855 |
| PSMG4     | -0.0117667 |
| ARL9      | 0.0117613  |
| ANXA11    | -0.0117558 |
| ZFPM2     | -0.0117499 |
| LPHN1     | -0.011747  |
| PPAP2A    | -0.0117442 |
| RTN2      | -0.0117405 |
| CYCS      | 0.01173676 |
| GPX8      | -0.0117324 |
| CDC42EP3  | -0.0117302 |
| GUK1      | 0.01172444 |
| GLS2      | -0.0117171 |
| CLTB      | -0.011715  |
| NDUFS4    | -0.0117117 |
| TRPA1     | 0.01169614 |
| BMI1      | -0.0116927 |
| PDE7B     | -0.0116912 |
| SPINT1    | -0.0116909 |
| HCFC2     | -0.0116828 |
| ZHX3      | -0.0116828 |
| ABHD6     | -0.011674  |
| DTWD1     | 0.01166677 |
| SLC17A5   | -0.0116666 |
| RNF217    | -0.0116649 |
| CALCRL    | -0.0116599 |

|          |            |
|----------|------------|
| CCT2     | 0.01165923 |
| TMEM222  | 0.01165104 |
| CDKN1A   | -0.0116502 |
| PPIE     | 0.01164169 |
| NOC4L    | 0.01163602 |
| MPDU1    | 0.01163594 |
| DUSP22   | -0.011631  |
| DENND3   | -0.0116262 |
| PTS      | -0.0116218 |
| EIF5A2   | 0.01161921 |
| PABPC4   | 0.01161449 |
| UCHL3    | 0.01161424 |
| ZNRF2    | -0.0115972 |
| IQGAP1   | -0.0115934 |
| RAD54L   | 0.01158902 |
| MICU1    | -0.0115856 |
| ANO10    | -0.0115784 |
| PRICKLE3 | -0.0115779 |
| ACER2    | 0.01157587 |
| EMID1    | -0.0115722 |
| JPH1     | -0.0115638 |
| GGH      | -0.0115637 |
| TEKT2    | -0.0115535 |
| LRRC1    | -0.0115524 |
| NCAPD2   | 0.01154966 |
| KLHL10   | -0.0115403 |
| LRSAM1   | -0.0115345 |
| TTC32    | -0.0115289 |
| MXI1     | -0.0115211 |
| ATP11A   | -0.0115012 |
| SIX4     | -0.0114953 |
| VTI1A    | -0.0114895 |
| SPATA2   | 0.01147861 |
| SEMA6C   | -0.0114686 |
| MCM5     | 0.01146665 |
| MRPL18   | 0.01146547 |
| ITFG3    | -0.0114646 |
| IGF2BP1  | 0.0114632  |
| TERF1    | 0.01146174 |
| FBXO9    | -0.01146   |
| SDHB     | -0.0114462 |
| CHTF8    | 0.01144283 |

|          |            |
|----------|------------|
| ARL16    | -0.0114406 |
| NUDT15   | 0.01143626 |
| AHRR     | -0.0114226 |
| LEPREL1  | -0.0114223 |
| RELN     | -0.0114206 |
| ACTR1A   | 0.01141538 |
| GOLIM4   | -0.0114078 |
| RTN4IP1  | 0.01140722 |
| ABCB6    | 0.01140275 |
| PPP3CA   | -0.0114016 |
| ACN9     | -0.0114002 |
| MAP1LC3A | -0.0113882 |
| FIGN     | 0.01138669 |
| SCHIP1   | -0.0113839 |
| ATF4     | 0.01138379 |
| PLXNC1   | -0.0113811 |
| AMD1     | 0.01138071 |
| TES      | -0.0113739 |
| NUP205   | 0.01136825 |
| TIMM9    | 0.01135777 |
| PFKFB4   | 0.0113498  |
| SYNPR    | -0.0113361 |
| RPS16    | 0.01133531 |
| CREBBP   | -0.011328  |
| STARD13  | -0.0113249 |
| SPSB1    | -0.0113227 |
| KIF1B    | -0.011321  |
| COL9A3   | -0.0113161 |
| LRRC34   | 0.01130408 |
| CCNJ     | 0.01130407 |
| CELF2    | -0.0112835 |
| TLE3     | -0.0112706 |
| PEX11A   | -0.0112545 |
| ARHGAP28 | -0.0112346 |
| RBPM2    | 0.01123156 |
| FOXO6    | -0.0112306 |
| AARS2    | 0.01122922 |
| ARID3B   | 0.01121607 |
| PDP2     | 0.01121078 |
| HSPA14   | 0.01120194 |
| NOTCH1   | -0.0111936 |
| REEP5    | -0.0111908 |

|         |            |
|---------|------------|
| PPP2R4  | 0.01118705 |
| SGMS2   | -0.0111738 |
| XPA     | -0.0111652 |
| GLI1    | -0.0111635 |
| SPATA2L | -0.0111627 |
| ABHD14B | -0.0111618 |
| TYMS    | 0.0111609  |
| ACP5    | -0.0111557 |
| SRPK3   | 0.01115531 |
| FUT8    | -0.0111494 |
| CUTC    | 0.01114739 |
| XKR6    | -0.0111399 |
| RGS9BP  | -0.0111381 |
| BCL2    | -0.0111327 |
| IKZF4   | -0.0111315 |
| ST7     | -0.0111177 |
| ARL6IP5 | -0.011116  |
| CLDN12  | 0.01110918 |
| MYO1E   | -0.0111081 |
| AKNA    | -0.0111071 |
| SLC6A13 | -0.0111068 |
| CCNG2   | -0.011096  |
| FGFR1OP | 0.01109598 |
| NUP107  | 0.01109541 |
| PDIA5   | 0.01109435 |
| DNAJB2  | -0.0110927 |
| PTTG1IP | -0.0110926 |
| PIAS3   | -0.0110867 |
| ZMIZ1   | -0.0110842 |
| TRPT1   | -0.0110716 |
| THPO    | 0.01107055 |
| RNF122  | -0.0110701 |
| SYCE2   | -0.0110622 |
| IGF1R   | -0.011061  |
| FRMD3   | -0.0110519 |
| BAHCC1  | 0.01105038 |
| NOLC1   | 0.01104635 |
| RAC3    | -0.0110443 |
| PFKFB1  | 0.01103578 |
| WARS    | 0.01103119 |
| MECP2   | -0.011028  |
| NSUN2   | 0.01102176 |

|          |            |
|----------|------------|
| SERPIND1 | -0.0110208 |
| LIPG     | 0.01101951 |
| ASNA1    | 0.01100927 |
| ABCC8    | -0.0110067 |
| SLC16A7  | -0.0110012 |
| MIS18BP1 | -0.0109968 |
| TOMM70A  | 0.01099619 |
| FOXP4    | -0.0109919 |
| CDK1     | 0.010991   |
| PTPRU    | -0.0109904 |
| SALL2    | -0.0109887 |
| AP1S2    | 0.01098677 |
| ALG3     | 0.01098565 |
| DYRK3    | 0.01098465 |
| GLIS3    | -0.0109799 |
| PPP1R12B | -0.0109613 |
| ZC4H2    | -0.010959  |
| FAM69B   | 0.01095607 |
| ICA1     | -0.010954  |
| FITM2    | 0.01094384 |
| TMEM88   | 0.0109349  |
| NEK3     | 0.01092158 |
| MYNN     | -0.0109215 |
| ATPBD4   | -0.0109194 |
| GCLM     | -0.0109129 |
| PRKAR1B  | -0.0109091 |
| CCS      | 0.01090714 |
| TAB2     | -0.0109064 |
| RABEP1   | -0.0109058 |
| GFM1     | 0.01090294 |
| HERPUD2  | -0.0108909 |
| CPSF3    | 0.0108904  |
| MYO1G    | 0.01088724 |
| ARSB     | -0.0108819 |
| MED24    | 0.01088059 |
| VRK1     | 0.01087208 |
| FBXL15   | 0.01086869 |
| PDCD2L   | 0.01086724 |
| APPL2    | -0.0108612 |
| GAB1     | -0.010853  |
| EIF6     | 0.01084635 |
| B4GALNT1 | -0.0108435 |



|          |            |
|----------|------------|
| MVD      | 0.01083775 |
| DNAJC11  | 0.01083731 |
| RP9      | -0.0108352 |
| ABCD1    | -0.0108346 |
| S100A10  | -0.0108323 |
| NIPA1    | -0.0108298 |
| SH3PXD2B | -0.0108258 |
| DDX24    | 0.01081618 |
| GDI1     | -0.0108137 |
| LIMA1    | -0.0108083 |
| MIF4GD   | 0.01080413 |
| UTP15    | 0.01080045 |
| HSPE1    | 0.01079281 |
| GDF11    | 0.0107855  |
| TTI1     | -0.0107818 |
| XYLT1    | -0.0107806 |
| SLC15A3  | -0.0107783 |
| MLLT6    | -0.010777  |
| INSIG1   | 0.01077674 |
| GART     | 0.01077495 |
| RPS27A   | 0.01076816 |
| CLIP4    | -0.0107661 |
| CISD1    | 0.010759   |
| NPM1     | 0.01075863 |
| PAQR5    | -0.0107578 |
| DOPEY1   | -0.0107574 |
| IGSF9B   | -0.0107515 |
| RFX5     | -0.01075   |
| ATP2C2   | -0.0107497 |
| MRPL38   | 0.01074735 |
| ASAH1    | -0.0107406 |
| P2RY6    | -0.0107368 |
| TM7SF2   | 0.0107257  |
| TBC1D9   | -0.010721  |
| SVOPL    | 0.01071557 |
| IMP4     | 0.01071322 |
| BPNT1    | 0.01071175 |
| PSMD14   | 0.01070853 |
| SFPQ     | -0.0107009 |
| SLC35E2  | -0.0106998 |
| CCNJL    | 0.01069735 |
| TEAD3    | -0.0106946 |

|          |            |
|----------|------------|
| AZIN1    | 0.01069074 |
| IRS1     | -0.0106853 |
| BID      | 0.01068442 |
| VAV3     | -0.0106843 |
| SMOX     | -0.0106796 |
| RHPN2    | -0.0106765 |
| CCDC137  | 0.01066835 |
| ITPA     | 0.01066737 |
| FAM131A  | -0.0106657 |
| ARHGEF17 | -0.0106604 |
| KLHL6    | 0.01065589 |
| MTHFSD   | -0.0106542 |
| MYD88    | -0.0106502 |
| RASGRP4  | -0.0106481 |
| LASP1    | -0.0106475 |
| SDHA     | 0.01064667 |
| EXOC6    | -0.0106459 |
| OCIAD2   | -0.0106346 |
| PLEKHG2  | -0.0106303 |
| RECQL5   | 0.01062558 |
| ARGLU1   | -0.0106198 |
| KREMEN2  | -0.0106162 |
| ULK2     | -0.0106134 |
| LAMB1    | -0.0106001 |
| PTGFR    | -0.010595  |
| GLIPR2   | -0.0105939 |
| LPP      | -0.0105936 |
| ASCC1    | -0.0105919 |
| ITIH5    | 0.01059029 |
| SYNJ2    | -0.0105871 |
| JAK2     | -0.0105855 |
| SRM      | 0.01058078 |
| PDCD4    | -0.0105697 |
| CCDC28B  | -0.0105594 |
| RUVBL1   | 0.01055538 |
| ATXN1L   | -0.0105512 |
| DDHD1    | -0.0105448 |
| POLR1D   | 0.01054407 |
| DQX1     | -0.0105431 |
| DLGAP5   | 0.01054215 |
| MECR     | 0.01053839 |
| RPP21    | -0.0105361 |

|          |            |
|----------|------------|
| FAM13C   | -0.0105326 |
| ZFPM1    | -0.0105322 |
| WIF1     | -0.0105289 |
| RDH5     | -0.0105273 |
| NFKBIZ   | -0.0105197 |
| HPN      | -0.0105165 |
| NAGK     | -0.0105129 |
| CTSK     | -0.0105022 |
| WDR26    | -0.0105012 |
| IMPDH2   | 0.01049495 |
| SKI      | -0.0104932 |
| BTBD6    | 0.0104914  |
| SNAPIN   | -0.0104887 |
| RNF111   | -0.0104865 |
| FOSL1    | 0.01048429 |
| OPTN     | 0.01048102 |
| EHHADH   | 0.01047287 |
| ADAMTS14 | -0.0104609 |
| KLHDC3   | 0.01045674 |
| NSUN4    | 0.01045599 |
| MARS2    | 0.01045496 |
| NAA50    | 0.01045354 |
| TXNL4B   | 0.0104497  |
| PBX1     | -0.010445  |
| SLC39A1  | -0.0104377 |
| MAPKAP1  | -0.0104323 |
| MDH2     | 0.0104164  |
| TRAF5    | -0.0104125 |
| DHRS1    | -0.0104032 |
| ITGAV    | -0.0104019 |
| RAB2A    | -0.0104018 |
| MBD5     | -0.0103963 |
| PPP2R2B  | -0.0103963 |
| CHMP1A   | 0.0103956  |
| RPUSD1   | 0.0103924  |
| PPP6R2   | -0.0103923 |
| EPAS1    | -0.0103902 |
| MAMDC4   | 0.01039011 |
| BRIX1    | 0.01038587 |
| POLH     | 0.01038414 |
| FAM5B    | -0.0103821 |
| GLCCI1   | -0.0103786 |

|         |            |
|---------|------------|
| RRNAD1  | -0.0103741 |
| TNRC6C  | -0.0103738 |
| AGBL2   | -0.0103723 |
| ENC1    | 0.01036755 |
| MEA1    | 0.01036602 |
| USP13   | 0.01036232 |
| PLEKHH2 | -0.0103599 |
| FARSA   | 0.01035787 |
| PPAP2C  | 0.01035659 |
| NR5A2   | -0.0103465 |
| GEMIN5  | 0.01034427 |
| GPC4    | -0.0103374 |
| RFTN1   | -0.0103367 |
| STYX    | -0.0103288 |
| BRCC3   | -0.0103271 |
| AMN1    | -0.010326  |
| NSUN3   | -0.0103255 |
| R3HDM2  | -0.0103244 |
| MRPL47  | 0.01032174 |
| FGD1    | -0.0103193 |
| MBIP    | -0.0103163 |
| MKL1    | -0.0103094 |
| BMP1    | -0.0103075 |
| LRPAP1  | -0.0103002 |
| TBC1D2B | -0.0102854 |
| ANPEP   | -0.0102672 |
| STXBP2  | -0.0102635 |
| NCOA2   | -0.0102586 |
| SORCS2  | -0.0102478 |
| MARS    | 0.01024003 |
| ALG2    | -0.0102341 |
| DNA2    | 0.0102317  |
| NOL8    | 0.01023136 |
| AHSA1   | 0.01022804 |
| P4HTM   | 0.01021648 |
| MRPL10  | 0.0102112  |
| EDN3    | -0.0102084 |
| MED8    | 0.01020468 |
| NOS3    | 0.0102045  |
| TSSC1   | 0.01019737 |
| RIBC1   | 0.0101937  |
| PRKCH   | -0.0101908 |

|           |            |
|-----------|------------|
| FAM126B   | -0.0101873 |
| SLC29A3   | -0.0101824 |
| NDRG1     | -0.010173  |
| DCP1B     | -0.0101702 |
| GOLGA1    | -0.0101626 |
| NEGR1     | -0.0101595 |
| YBEY      | 0.01015569 |
| USP21     | -0.0101464 |
| FNIP1     | -0.0101447 |
| EFHA2     | -0.010143  |
| NTRK2     | -0.0101416 |
| EPHA4     | -0.0101372 |
| EFCAB2    | -0.0101353 |
| CAST      | -0.0101347 |
| CSRP2     | -0.0101318 |
| EFHB      | 0.01013012 |
| WRAP53    | 0.01012999 |
| GATA6     | -0.0101295 |
| CEP78     | 0.01012608 |
| ABCA2     | -0.0101199 |
| B3GALT1   | -0.0101174 |
| SOX6      | 0.01011228 |
| PCMTD2    | -0.0101116 |
| IRAK4     | -0.0101114 |
| TATDN3    | 0.01010161 |
| POLR2L    | 0.01010096 |
| SORBS1    | -0.0100983 |
| CCND1     | 0.01009799 |
| CAPZA2    | 0.01009482 |
| RPL18A    | 0.01009065 |
| CDK2AP2   | 0.01008831 |
| GTDC1     | -0.0100811 |
| ANTXR2    | -0.0100744 |
| TAF3      | -0.0100726 |
| RGMB      | -0.0100719 |
| FLNB      | -0.0100661 |
| ADIPOR1   | -0.0100622 |
| RFC3      | 0.01006215 |
| SECISBP2L | -0.0100605 |
| EHBP1     | -0.0100601 |
| EXOC5     | -0.0100543 |
| GNAQ      | -0.0100477 |

|          |            |
|----------|------------|
| HSPH1    | 0.01004758 |
| FANCG    | 0.01004635 |
| SGK3     | -0.0100462 |
| DUS1L    | 0.01004296 |
| MELK     | 0.01004027 |
| METTL1   | 0.01003835 |
| RNF13    | -0.0100304 |
| PLCH2    | -0.0100298 |
| XPOT     | 0.01002796 |
| GSTCD    | 0.01000939 |
| SETD7    | -0.0099996 |
| HOXB4    | 0.00999914 |
| TXNRD1   | 0.00998314 |
| NEURL1B  | -0.0099797 |
| GNE      | 0.00997963 |
| TGIF1    | -0.0099795 |
| FAM71E1  | -0.0099785 |
| IGSF8    | -0.0099783 |
| ADPRHL2  | 0.00997207 |
| EPOR     | 0.00997116 |
| CTDSP2   | -0.00997   |
| ACOT9    | -0.0099658 |
| BOC      | -0.0099597 |
| SIPA1L2  | -0.0099574 |
| PLCD1    | -0.0099555 |
| SUCLG1   | 0.00995525 |
| ABCD2    | -0.0099532 |
| PXK      | -0.0099513 |
| PHOSPHO1 | -0.009951  |
| RSBN1    | -0.0099506 |
| RNF14    | -0.009944  |
| PIK3R3   | -0.0099381 |
| DARS     | 0.00993781 |
| TTBK2    | -0.0099322 |
| ENPP4    | -0.0099303 |
| HEY2     | -0.0099286 |
| SKP2     | 0.00992737 |
| MTIF2    | -0.0099182 |
| FOXO3    | -0.009917  |
| CACYBP   | 0.00991704 |
| N6AMT1   | -0.0099148 |
| PWP1     | 0.00991454 |

|          |            |
|----------|------------|
| FAM171A1 | -0.0099136 |
| CD34     | 0.00991255 |
| MAPK6    | 0.00991236 |
| SLC6A8   | -0.0099102 |
| SLC16A1  | 0.00990952 |
| MTMR10   | -0.0099088 |
| PTPN14   | -0.009906  |
| FNBP1L   | -0.0099053 |
| MED6     | -0.0099024 |
| BTBD7    | -0.0098876 |
| DAB2IP   | -0.0098856 |
| ECE2     | 0.00988495 |
| GEN1     | 0.00987871 |
| CCDC96   | 0.00987625 |
| MERTK    | -0.0098717 |
| ASCC2    | -0.0098652 |
| PPP1R11  | -0.0098636 |
| MAPKBP1  | -0.0098627 |
| STK33    | 0.00986179 |
| KLHL3    | -0.0098567 |
| RASSF8   | -0.0098547 |
| TRAPPC8  | -0.0098521 |
| MRPS12   | 0.00985007 |
| MBP      | -0.0098476 |
| B4GALT7  | 0.00984592 |
| POLR2F   | 0.00984492 |
| FBXO31   | 0.00984096 |
| SYDE2    | -0.0098295 |
| RTKN     | -0.009826  |
| RREB1    | -0.009824  |
| GDPD1    | -0.0098223 |
| SLA      | -0.0098195 |
| CSF2RB   | 0.00981806 |
| ABCA7    | -0.0098174 |
| ARHGAP18 | -0.0098117 |
| ASPN     | -0.0098103 |
| ARRDC3   | -0.0098066 |
| SIK1     | -0.0098052 |
| STRN3    | -0.0098031 |
| ADRM1    | 0.0098024  |
| MAPK13   | -0.0098004 |
| GCAT     | 0.00978911 |

|         |            |
|---------|------------|
| RBM20   | -0.0097845 |
| ACVR1   | -0.0097835 |
| TPK1    | -0.0097777 |
| ETFDH   | -0.0097665 |
| SYNE1   | -0.0097538 |
| KIF26B  | -0.0097534 |
| WDR18   | 0.00975213 |
| CYP26A1 | 0.0097493  |
| NTHL1   | 0.00974663 |
| RHOQ    | -0.0097401 |
| CHD7    | 0.00974006 |
| CDK9    | 0.00971069 |
| SORT1   | -0.0097088 |
| NKD1    | -0.0097075 |
| SH3D19  | -0.0097072 |
| FBXO42  | -0.0097041 |
| TXNDC16 | -0.0097032 |
| TGDS    | 0.00970187 |
| TBCC    | -0.0097013 |
| ABHD14A | 0.00969896 |
| PDGFC   | -0.0096975 |
| WFS1    | -0.0096935 |
| TMEM107 | -0.0096914 |
| RNPEPL1 | -0.0096885 |
| KCTD17  | 0.00968312 |
| MAFF    | 0.00967455 |
| CCDC25  | -0.0096677 |
| LPIN2   | -0.009663  |
| NFE2    | -0.0096617 |
| PDZRN3  | -0.009657  |
| CLP1    | 0.00965582 |
| VPS13B  | -0.0096533 |
| ZDHHC9  | -0.009652  |
| PAK6    | -0.0096484 |
| PIH1D1  | 0.0096455  |
| TTLL7   | -0.0096426 |
| CLK2    | -0.0096416 |
| AKT3    | -0.00964   |
| PTX3    | -0.0096371 |
| KCNG2   | -0.0096363 |
| VARS    | 0.00963444 |
| TMEM5   | -0.0096315 |



|          |            |
|----------|------------|
| ELMO3    | -0.0096291 |
| PDE12    | 0.00962147 |
| GATA3    | -0.0096173 |
| STAMBP   | -0.0096118 |
| LIN7C    | 0.00960763 |
| CENPH    | 0.00959898 |
| PDZD7    | -0.0095959 |
| EZH1     | -0.0095958 |
| CBY1     | 0.00958885 |
| SVEP1    | -0.0095864 |
| EIF2B2   | 0.0095815  |
| RUNDC1   | -0.0095743 |
| STAT1    | -0.0095692 |
| PRDM6    | 0.00956869 |
| MARVELD1 | -0.0095655 |
| TRIB2    | -0.0095655 |
| PAM      | -0.0095643 |
| LACE1    | -0.0095609 |
| ING5     | 0.00955831 |
| TMEM184C | -0.0095576 |
| DR1      | 0.00955541 |
| CRAMP1L  | -0.0095484 |
| MYO6     | -0.0095405 |
| ZFAND2B  | 0.00954005 |
| GRAMD1C  | -0.0095389 |
| PCNX     | -0.0095377 |
| TMEM59L  | 0.00953761 |
| BZW1     | 0.0095373  |
| TIMELESS | 0.00953495 |
| ERLEC1   | -0.0095339 |
| WDR43    | 0.00952719 |
| RPL9     | 0.00952399 |
| THSD4    | -0.0095226 |
| HOXC4    | 0.00952084 |
| KLHL32   | 0.00951951 |
| ATF2     | -0.0095094 |
| DTL      | 0.00950731 |
| MFAP3L   | -0.0095045 |
| L3MBTL2  | 0.00950295 |
| F8       | -0.0095012 |
| SGK1     | -0.0095011 |
| HECA     | -0.0094992 |

|          |            |
|----------|------------|
| CYB5D1   | 0.00949874 |
| TRAF3IP2 | -0.0094976 |
| CTDSPL   | -0.0094935 |
| PEX3     | -0.0094896 |
| SGMS1    | -0.0094885 |
| DIABLO   | 0.00948411 |
| ADAMTS3  | -0.0094837 |
| SPEN     | -0.0094831 |
| KLF8     | -0.0094829 |
| FAM3A    | -0.0094821 |
| B3GALT2  | -0.0094821 |
| ZDHHC8   | -0.0094807 |
| WASF3    | -0.009466  |
| SPDYA    | -0.0094522 |
| FAM107B  | -0.0094461 |
| LRRC57   | 0.00944423 |
| S1PR3    | -0.0094417 |
| SRA1     | -0.0094309 |
| ARHGAP6  | -0.0094287 |
| SPAG16   | -0.0094249 |
| SRGAP1   | -0.0094235 |
| WDR59    | -0.0094211 |
| HSBP1    | -0.0094139 |
| SH3BP1   | -0.0094138 |
| SYT11    | -0.0094121 |
| KIF3A    | -0.009412  |
| PGS1     | 0.00941112 |
| SMAD3    | -0.0094077 |
| TRMT2A   | 0.00940559 |
| DPYSL3   | -0.0094054 |
| CACNB2   | -0.009404  |
| NUDCD1   | 0.00940149 |
| UNC50    | -0.0093971 |
| PTCH2    | -0.0093897 |
| TBC1D22A | 0.00938617 |
| MBNL2    | -0.0093799 |
| ANKRD49  | -0.0093669 |
| SRP19    | -0.0093662 |
| ATRX     | -0.0093647 |
| DKC1     | 0.00936462 |
| FGGY     | 0.00935171 |
| KLHL29   | -0.0093484 |

|         |            |
|---------|------------|
| TTK     | 0.00934393 |
| KIFAP3  | -0.0093424 |
| CCDC3   | -0.0093308 |
| CLEC11A | -0.0093303 |
| MRPS34  | 0.00932109 |
| ERH     | 0.00932068 |
| POLR2D  | 0.00931957 |
| FBXL17  | -0.0093156 |
| PITPNA  | -0.0093123 |
| RPAIN   | -0.0093107 |
| DNAJC17 | 0.00930783 |
| TTC7B   | -0.0093037 |
| CSNK1E  | -0.0093017 |
| DAPP1   | -0.0092917 |
| RBFOX2  | -0.0092869 |
| PKNOX2  | -0.009285  |
| SSH2    | -0.0092788 |
| WDFY3   | -0.0092786 |
| SLC9A6  | -0.009275  |
| ATL3    | -0.0092709 |
| SOX13   | 0.00926921 |
| EFEMP2  | -0.0092684 |
| ARFGEF1 | -0.0092675 |
| HSDL2   | -0.0092657 |
| SPCS1   | -0.0092621 |
| LRRC8C  | -0.0092614 |
| TRABD   | 0.00925524 |
| PRKD2   | -0.0092487 |
| NFASC   | -0.009243  |
| RIT1    | -0.0092402 |
| DCLRE1B | 0.00924013 |
| EPHA1   | -0.0092383 |
| PHLDB2  | -0.009234  |
| CTDSP1  | -0.0092279 |
| EXOC2   | -0.0092207 |
| GATA1   | 0.00921985 |
| MPZL1   | -0.0092131 |
| TCF20   | -0.0092107 |
| DAB1    | -0.0092106 |
| NUDT9   | 0.00920947 |
| CRADD   | -0.0092086 |
| DPP7    | 0.00920371 |

|          |            |
|----------|------------|
| LLGL2    | 0.00919918 |
| POLR1C   | 0.00919631 |
| GSTZ1    | -0.0091946 |
| NCAPG2   | 0.00919332 |
| MRPS30   | 0.00918903 |
| SLC39A13 | -0.0091885 |
| SPSB4    | -0.0091769 |
| ELK4     | -0.0091733 |
| LIX1     | -0.0091643 |
| IPPK     | 0.00916407 |
| HMGCLL1  | -0.0091582 |
| CNTLN    | -0.0091575 |
| MRPL12   | 0.009156   |
| GPR179   | -0.009149  |
| ETV3     | -0.0091486 |
| LRP1     | -0.0091464 |
| MLLT3    | -0.0091463 |
| MDN1     | 0.00914298 |
| CIR1     | -0.0091396 |
| OGG1     | 0.009139   |
| BEND4    | 0.00913837 |
| VASH1    | -0.009136  |
| FAM188B  | 0.00912932 |
| DNAJC28  | -0.0091278 |
| CLIP2    | -0.0091268 |
| ANXA6    | -0.0091266 |
| IFT88    | -0.0091256 |
| SH3GLB1  | -0.0091226 |
| CRELD1   | 0.00912127 |
| ENTPD7   | -0.0091185 |
| GOT1     | 0.0091125  |
| SYT2     | -0.0091023 |
| ARHGEF11 | -0.0090986 |
| USP11    | -0.0090986 |
| RAPH1    | -0.0090875 |
| MLL3     | -0.0090871 |
| SH3BP5   | -0.0090856 |
| PHF20L1  | -0.0090828 |
| NBEAL1   | -0.0090828 |
| WIPF1    | -0.00908   |
| CDIPT    | 0.00907934 |
| ACAD11   | 0.00907648 |

|         |            |
|---------|------------|
| CASD1   | 0.00907621 |
| FAN1    | -0.0090761 |
| BUB1B   | 0.00907237 |
| KCTD9   | -0.0090722 |
| NFYA    | -0.0090722 |
| ANGPT1  | -0.0090699 |
| DNPEP   | -0.0090665 |
| WHSC1L1 | -0.009058  |
| AGK     | 0.0090564  |
| RNF167  | -0.0090472 |
| FAM98A  | 0.00904541 |
| PPIP5K1 | -0.0090409 |
| METTL22 | 0.00903338 |
| FAM196A | -0.0090255 |
| PNPLA6  | -0.0090127 |
| GPC3    | 0.00901163 |
| MAP4K5  | -0.0090092 |
| MCM3AP  | 0.0090025  |
| GLRB    | -0.0089986 |
| PSMD12  | 0.00898122 |
| AAK1    | -0.008981  |
| FUNDC1  | -0.0089801 |
| WNT5A   | -0.0089756 |
| MRPS5   | 0.00897522 |
| OSBPL8  | -0.0089741 |
| PHC3    | -0.008968  |
| COX15   | 0.00896357 |
| UQCR10  | -0.0089538 |
| ECD     | 0.00895247 |
| MANF    | 0.00895189 |
| HELB    | 0.00895183 |
| ZBTB7C  | -0.0089484 |
| FECH    | -0.0089477 |
| CXXC5   | 0.00894495 |
| PHYHD1  | -0.0089436 |
| PTPRZ1  | -0.0089391 |
| MRPS7   | 0.00893897 |
| NAA15   | 0.00893727 |
| DTWD2   | 0.00893271 |
| WDR61   | 0.00893237 |
| DNTTIP1 | -0.008932  |
| MTIF3   | 0.00892038 |

|          |            |
|----------|------------|
| SKA1     | 0.00891433 |
| VPS28    | -0.0089143 |
| TOE1     | 0.00890837 |
| CEP57L1  | 0.00890445 |
| PSMB2    | 0.00889735 |
| TMEM100  | -0.0088912 |
| DYRK2    | -0.0088908 |
| LNX1     | -0.008889  |
| PGP      | 0.00888767 |
| RASEF    | -0.0088858 |
| MAPK14   | -0.0088829 |
| UBE2L6   | -0.0088783 |
| VPS52    | -0.0088722 |
| FUNDC2   | -0.0088717 |
| HOXA5    | 0.00886989 |
| FBXO46   | -0.0088684 |
| DNAJB1   | -0.0088647 |
| TMEM175  | -0.0088635 |
| STARD10  | -0.0088592 |
| MTSS1L   | -0.0088582 |
| HSD17B7  | 0.00885032 |
| INPP5E   | -0.0088471 |
| EBPL     | 0.00884695 |
| PLEKHN1  | -0.0088435 |
| ITGB1BP1 | -0.0088424 |
| TAOK3    | -0.0088416 |
| RG9MTD2  | 0.00884081 |
| RCOR3    | -0.0088396 |
| TEAD1    | -0.0088382 |
| TSC2     | -0.0088334 |
| GREB1    | 0.00883076 |
| DACH1    | 0.00882875 |
| MGAT5    | -0.0088191 |
| TMEM143  | 0.00881725 |
| BMPR1B   | -0.0088163 |
| METTL16  | 0.00881483 |
| XRCC6BP1 | 0.00881393 |
| CHD6     | -0.0088106 |
| MYOM1    | -0.0088076 |
| IKBKE    | -0.0088075 |
| XPO5     | 0.00880685 |
| ARHGEF7  | -0.0088039 |

|         |            |
|---------|------------|
| CCNI    | -0.0088008 |
| ALPL    | -0.0087993 |
| GUSB    | 0.00879226 |
| SLMAP   | -0.0087908 |
| MCMBP   | 0.00879052 |
| PRSS23  | -0.0087884 |
| NGDN    | 0.00878409 |
| CNKSR1  | -0.0087836 |
| PNLDC1  | -0.0087763 |
| KDELC2  | -0.008776  |
| CNNM3   | -0.0087734 |
| TMEM101 | 0.00876989 |
| PLCL2   | 0.0087689  |
| VAT1L   | -0.0087635 |
| GFOD1   | -0.0087534 |
| IMPA1   | 0.00874421 |
| IKBIP   | -0.0087422 |
| ECM2    | -0.0087353 |
| B4GALT5 | -0.0087335 |
| DNMBP   | -0.0087333 |
| STK24   | -0.0087315 |
| SLC5A6  | 0.00873099 |
| CCNDBP1 | -0.0087303 |
| CYFIP1  | -0.0087298 |
| RGS9    | -0.0087278 |
| LRRC59  | 0.00872309 |
| KCNE1L  | 0.00872215 |
| TRIP13  | 0.00872019 |
| PUF60   | -0.00872   |
| RENBP   | -0.0087171 |
| NELF    | -0.0087091 |
| UBE2E2  | -0.0087033 |
| RIOK2   | 0.00870274 |
| SIPA1L1 | -0.0086984 |
| KIF2C   | 0.00869113 |
| EIF2S2  | 0.00868858 |
| MRPL19  | 0.00868159 |
| PPM1F   | 0.00867953 |
| ZDHHC20 | -0.0086791 |
| SLC35A5 | -0.0086789 |
| JPH2    | 0.00867315 |
| PRKCI   | -0.0086713 |

|         |            |
|---------|------------|
| CARD14  | -0.0086707 |
| ABHD12  | -0.008669  |
| POC1A   | 0.00866828 |
| HS2ST1  | -0.0086619 |
| VPS33B  | -0.0086605 |
| FZD1    | -0.0086547 |
| GLG1    | -0.0086542 |
| GIN1    | -0.0086536 |
| RBBP6   | -0.0086507 |
| LRRC8D  | -0.0086497 |
| DPM3    | -0.0086421 |
| FCF1    | -0.0086409 |
| HMBOX1  | -0.0086407 |
| DFFA    | 0.00863789 |
| RCL1    | 0.00863297 |
| CALU    | 0.00863058 |
| POLR1E  | 0.0086287  |
| STIP1   | 0.00862497 |
| SFT2D2  | -0.0086233 |
| STX18   | 0.00862071 |
| FAM110B | 0.0086119  |
| RFT1    | 0.00860697 |
| MTAP    | 0.00860455 |
| ATP11B  | -0.0086009 |
| DENND4A | -0.0085984 |
| CLYBL   | 0.0085968  |
| DCLK2   | -0.0085951 |
| DUSP16  | -0.0085924 |
| PHACTR2 | -0.00859   |
| PHF12   | -0.0085889 |
| ALG6    | -0.0085835 |
| YAF2    | 0.00857397 |
| SH2D4A  | -0.0085723 |
| PLEKHA1 | -0.008564  |
| RNF38   | -0.0085618 |
| UST     | -0.008555  |
| CBX7    | -0.0085525 |
| PHF21A  | -0.0085478 |
| VDAC2   | 0.0085466  |
| PMM2    | 0.00854486 |
| DUSP7   | -0.0085434 |
| LARP4   | 0.00854292 |



|           |            |
|-----------|------------|
| PAPSS1    | -0.0085427 |
| PLCE1     | -0.0085415 |
| CTTNBP2NL | -0.0085398 |
| FAM20C    | 0.00853327 |
| PHKA2     | -0.0085319 |
| BRF1      | -0.0085317 |
| CCNH      | 0.00852306 |
| IPO11     | 0.00851925 |
| TPPP3     | -0.0085178 |
| PDE10A    | -0.0085169 |
| CD276     | -0.0085153 |
| RAE1      | 0.00851026 |
| SIK2      | -0.0085102 |
| GALK1     | 0.00850722 |
| FAM100B   | 0.00850646 |
| SFI1      | -0.0085029 |
| VAMP2     | -0.0084933 |
| NSL1      | 0.00849168 |
| MTHFD2    | 0.00849081 |
| KLHL2     | 0.0084809  |
| NMD3      | 0.00847811 |
| PRELP     | -0.0084778 |
| BCCIP     | 0.00847713 |
| PIM1      | 0.00847454 |
| MORN2     | 0.00847403 |
| LIMD2     | -0.0084669 |
| CDT1      | 0.00845993 |
| SPECC1L   | -0.0084462 |
| KCNJ15    | -0.0084379 |
| TTC39A    | 0.00843672 |
| SHROOM3   | -0.0084293 |
| DCAF15    | 0.00842916 |
| WBP1      | -0.0084233 |
| PODXL     | -0.0084232 |
| CEP170    | -0.008423  |
| AP3M2     | -0.008418  |
| NAT10     | 0.00841456 |
| MID2      | -0.0084132 |
| EXTL2     | 0.00841037 |
| PIK3C2A   | -0.0084066 |
| SDC4      | -0.0084036 |
| HABP4     | -0.0084011 |

|           |            |
|-----------|------------|
| ACYP2     | -0.0083971 |
| MTMR7     | -0.0083948 |
| PTGES3    | 0.00839192 |
| CBFB      | -0.0083876 |
| SNX25     | -0.0083851 |
| ALG8      | 0.0083844  |
| BCL9      | -0.008378  |
| UTP6      | 0.00837597 |
| UBE4A     | -0.0083755 |
| EPS8L1    | -0.008375  |
| KIF22     | 0.00836996 |
| PLK1      | 0.00836728 |
| BPGM      | -0.0083626 |
| BAX       | 0.00835958 |
| MRPS18B   | 0.00835528 |
| SPRED3    | -0.0083551 |
| WNK1      | -0.0083538 |
| TSPAN31   | -0.0083507 |
| APBB1IP   | 0.00834816 |
| KDM4C     | -0.0083445 |
| BAMBI     | -0.0083429 |
| KDM5A     | -0.0083428 |
| MSH6      | 0.00834188 |
| SULF2     | 0.0083411  |
| VASH2     | -0.0083289 |
| NOSTRIN   | 0.00832839 |
| CRLS1     | -0.0083277 |
| FAM126A   | 0.00832519 |
| PTPRF     | -0.0083236 |
| CLEC16A   | -0.0083229 |
| RALGDS    | -0.0083202 |
| NCBP1     | 0.00832001 |
| NAV1      | -0.0083194 |
| KRT222    | 0.00831634 |
| NAGPA     | 0.00831273 |
| SH3YL1    | -0.0083102 |
| KLHL7     | -0.0083078 |
| LRP2      | -0.0083019 |
| CCDC58    | 0.00829781 |
| ANKRD11   | -0.008297  |
| MPHOSPH10 | 0.0082944  |
| PAR6B     | 0.00828805 |

|         |            |
|---------|------------|
| COL4A5  | -0.0082879 |
| TM7SF3  | 0.00828186 |
| UBE2H   | -0.0082797 |
| SLC17A9 | -0.0082735 |
| IRAK2   | 0.00826959 |
| USP34   | -0.0082624 |
| AVPI1   | -0.0082515 |
| FAM19A5 | -0.0082506 |
| CCDC80  | -0.0082484 |
| BLM     | 0.00824563 |
| ADAMTS6 | -0.0082449 |
| PTPN6   | 0.00824192 |
| TMEM48  | 0.00824137 |
| CHCHD5  | 0.00823955 |
| PAIP2   | -0.0082348 |
| GPX7    | 0.00823456 |
| EFHA1   | -0.0082283 |
| TH1L    | 0.00821838 |
| ABCD3   | -0.0082183 |
| ST7L    | -0.0082113 |
| RAPGEF5 | -0.0082066 |
| NDFIP2  | -0.0082049 |
| DDOST   | -0.0082043 |
| ASH2L   | 0.00820079 |
| TXNL4A  | 0.00820032 |
| YKT6    | 0.00819714 |
| WDR91   | 0.00819575 |
| B3GNT2  | -0.0081927 |
| MAL     | -0.0081915 |
| GMPPB   | -0.0081886 |
| CGRRF1  | 0.00818827 |
| USP43   | -0.0081868 |
| EXO1    | 0.00817295 |
| BBS2    | -0.0081696 |
| SCLY    | -0.0081663 |
| TXNRD3  | 0.00816537 |
| NR4A1   | 0.00816445 |
| CUEDC1  | -0.0081636 |
| MIPEP   | 0.00816255 |
| SLC38A4 | 0.00816252 |
| PAWR    | -0.0081624 |
| SSH1    | -0.0081624 |

|          |            |
|----------|------------|
| IMPACT   | 0.00815743 |
| ZBTB25   | -0.0081518 |
| PPOX     | -0.0081486 |
| NDUFAF1  | 0.00814834 |
| SPICE1   | 0.00814756 |
| SMCR7    | 0.00814479 |
| TBC1D20  | -0.0081441 |
| SATB1    | -0.0081433 |
| COQ3     | 0.00814214 |
| PNPLA8   | -0.008142  |
| DCK      | 0.00813955 |
| PACS2    | -0.0081354 |
| SLC25A20 | 0.00813008 |
| AP3S1    | -0.0081238 |
| PRR14    | -0.0081175 |
| NOL11    | 0.00811006 |
| LDHB     | -0.0081079 |
| GLOD4    | 0.00810758 |
| CSTF1    | 0.00810733 |
| CISH     | -0.0081066 |
| HSDL1    | 0.00810018 |
| FANCL    | -0.0080962 |
| VAMP7    | -0.0080959 |
| RWDD3    | 0.00809405 |
| TAPT1    | -0.0080911 |
| MICAL1   | -0.0080902 |
| SH3KBP1  | -0.0080871 |
| CCND3    | 0.00808694 |
| TRAPPC5  | 0.0080817  |
| E4F1     | -0.0080756 |
| SPPL3    | -0.0080705 |
| MGST3    | 0.00807032 |
| SLC35A2  | -0.0080695 |
| TMBIM6   | 0.00806814 |
| PRKX     | -0.0080656 |
| TLE1     | -0.0080633 |
| PARP4    | -0.0080607 |
| POLR2B   | 0.00806    |
| UQCRC1   | 0.00805828 |
| SETBP1   | -0.0080547 |
| PTCD2    | 0.00805166 |
| FAM173B  | 0.00804731 |

|          |            |
|----------|------------|
| LRRC8E   | -0.0080376 |
| KLC3     | 0.00803552 |
| TBC1D13  | 0.00803216 |
| CASKIN1  | 0.00803154 |
| SHANK3   | 0.00803107 |
| CEP152   | 0.00803041 |
| GPS2     | -0.0080266 |
| PEX5L    | -0.0080236 |
| ELP3     | 0.00802058 |
| UBL3     | -0.0080129 |
| NKIRAS1  | -0.0080111 |
| AASDHPPT | -0.008007  |
| RNF135   | 0.00800512 |
| RCCD1    | 0.00800028 |
| TRIM3    | -0.0079999 |
| ZMAT2    | 0.00799776 |
| USE1     | 0.00799735 |
| CYHR1    | -0.0079853 |
| FAM82A1  | -0.007985  |
| TBC1D2   | -0.0079818 |
| SLC12A2  | -0.0079816 |
| UBE2I    | 0.00797552 |
| CCNE2    | 0.00797529 |
| PSTK     | -0.0079708 |
| PDE4B    | -0.0079707 |
| EBAG9    | -0.007968  |
| LGR4     | -0.0079674 |
| POGZ     | -0.0079674 |
| TPRN     | -0.007967  |
| ACYP1    | -0.0079645 |
| WDR81    | -0.0079643 |
| CCDC134  | 0.0079618  |
| XRN2     | 0.00796118 |
| RBX1     | 0.00795994 |
| POLR3H   | 0.00795247 |
| DCTN5    | -0.0079516 |
| USP20    | -0.0079504 |
| PARVG    | -0.0079485 |
| NPHP1    | 0.00794624 |
| MID1IP1  | 0.00794375 |
| RSU1     | -0.0079436 |
| CHD2     | -0.007936  |

|         |            |
|---------|------------|
| TNKS    | -0.0079356 |
| MED9    | 0.00793479 |
| PLCB3   | -0.0079311 |
| HDAC10  | 0.00792595 |
| TNRC6B  | -0.0079214 |
| DPH5    | 0.00791963 |
| TAF8    | 0.00791608 |
| ARV1    | 0.00791608 |
| DEPDC7  | -0.0079157 |
| FANCE   | 0.00791431 |
| COX5A   | -0.0079096 |
| CXCR4   | -0.0079076 |
| CCDC85C | 0.00790616 |
| LRRC27  | 0.00790474 |
| ZFP1    | -0.0078937 |
| WDHD1   | 0.00788987 |
| CLCN2   | -0.0078891 |
| DIEXF   | 0.00788759 |
| MMP19   | -0.0078874 |
| DYNC1I1 | 0.00788704 |
| RAB24   | -0.0078842 |
| CNDP2   | 0.00787708 |
| ZFP36L2 | -0.0078721 |
| CHMP1B  | 0.00786613 |
| ALDH6A1 | -0.0078621 |
| CKAP4   | -0.0078602 |
| HMGCL   | 0.00785901 |
| RBM41   | -0.0078561 |
| SETD2   | -0.0078549 |
| TMEM57  | -0.0078528 |
| KATNB1  | -0.0078509 |
| RNMTL1  | 0.00784956 |
| NAA10   | 0.00784474 |
| MAPK9   | -0.0078443 |
| BTK     | 0.00784131 |
| HDAC7   | -0.0078402 |
| ZADH2   | 0.00783936 |
| MRPL1   | 0.00783913 |
| MRPS9   | 0.0078362  |
| ATP7A   | -0.0078337 |
| CYP2R1  | -0.0078329 |
| ELOVL5  | 0.00783099 |

|          |            |
|----------|------------|
| PPRC1    | 0.00783006 |
| ACVRL1   | 0.007826   |
| POLR3D   | 0.00782557 |
| GFPT2    | 0.00782143 |
| NARS     | 0.00781645 |
| SLBP     | 0.00781587 |
| FAM125B  | -0.0078141 |
| MNAT1    | 0.0078129  |
| CSPP1    | -0.0078118 |
| DUSP2    | 0.00779995 |
| MRPL3    | 0.00779955 |
| FAM134C  | -0.0077948 |
| GPATCH3  | 0.00779415 |
| RAPGEFL1 | -0.007793  |
| SRP14    | -0.0077916 |
| GLA      | 0.00778943 |
| UBA7     | 0.00778307 |
| EML3     | 0.00778071 |
| HNRPDL   | 0.00777736 |
| URB2     | 0.00777371 |
| HACL1    | -0.0077718 |
| NUDT13   | 0.00777173 |
| MTERFD1  | -0.0077691 |
| ZFYVE21  | -0.0077683 |
| VRK3     | -0.0077619 |
| GRK5     | -0.0077601 |
| ARHGAP32 | -0.0077568 |
| UROS     | -0.0077562 |
| YAP1     | -0.0077554 |
| FKBP14   | -0.0077506 |
| PLXNB2   | -0.0077429 |
| TBP      | 0.00774261 |
| KCNA1    | 0.00774144 |
| RHOJ     | -0.0077406 |
| MON1B    | -0.0077356 |
| PSMD8    | 0.00773125 |
| RBBP4    | 0.00772898 |
| TCF12    | -0.0077243 |
| PKP4     | -0.007722  |
| TMCC3    | -0.0077186 |
| ATP6V0E2 | -0.0077176 |
| ARID1A   | -0.0077129 |

|         |            |
|---------|------------|
| JMY     | -0.0077108 |
| HIPK1   | -0.007699  |
| CCDC120 | -0.0076976 |
| PROCR   | 0.00769566 |
| AMBRA1  | -0.0076939 |
| ATF7IP  | -0.007693  |
| ZRANB1  | -0.0076888 |
| ZFP161  | 0.0076879  |
| GPD1L   | 0.00768682 |
| THUMPD3 | 0.00768327 |
| SNX16   | -0.0076759 |
| NIN     | -0.0076744 |
| TAX1BP1 | -0.0076727 |
| PYCRL   | 0.00766657 |
| STX17   | -0.0076642 |
| MYH7B   | 0.00766337 |
| MRPS11  | 0.00766222 |
| BIRC5   | 0.00765142 |
| ADCK1   | 0.00765125 |
| SNRNP40 | 0.00764749 |
| OSCP1   | -0.0076457 |
| RPL21   | 0.00764536 |
| STAC    | 0.00764305 |
| ECT2    | 0.00763557 |
| RPS9    | 0.0076319  |
| PREP    | 0.00763129 |
| RAP1A   | -0.0076301 |
| ACAT1   | -0.0076226 |
| EIF4B   | 0.00762246 |
| MRPL14  | 0.00762184 |
| SLC22A5 | 0.00761933 |
| MYB     | -0.0076166 |
| CCT4    | 0.00761481 |
| ITPKB   | -0.0076147 |
| UTP20   | 0.00761307 |
| RARS    | 0.00760726 |
| FBXL3   | -0.0076052 |
| SNRPA1  | 0.0076028  |
| TPBG    | -0.0075936 |
| YTHDC1  | -0.0075918 |
| BCL7C   | -0.0075916 |
| NAB2    | -0.0075907 |



|         |            |
|---------|------------|
| FSCN2   | -0.00759   |
| VEZF1   | -0.0075874 |
| DAP3    | 0.00758375 |
| AK3     | -0.0075835 |
| GINS2   | 0.00757801 |
| MRPL32  | 0.0075772  |
| RAI14   | -0.007577  |
| STK39   | 0.00757397 |
| AMOTL1  | -0.0075738 |
| KIF9    | -0.0075704 |
| STMN1   | -0.0075672 |
| FTSJ2   | 0.00756561 |
| LRRC41  | 0.00756498 |
| BAIAP2  | -0.0075569 |
| PIAS2   | -0.007555  |
| CDKL5   | -0.0075541 |
| COQ10A  | -0.007553  |
| KLHL25  | 0.00755259 |
| WDSUB1  | -0.0075525 |
| GPRIN3  | 0.00754949 |
| ETV1    | 0.00754877 |
| ACTG1   | 0.00754786 |
| MOCS3   | -0.0075471 |
| MRPS14  | 0.00754422 |
| SPRYD4  | 0.00753985 |
| TMEM204 | 0.00753974 |
| NIF3L1  | 0.00753702 |
| NHS     | 0.00753563 |
| EIF3E   | 0.00753085 |
| PPIG    | -0.007527  |
| ELAC2   | 0.00752361 |
| SMURF1  | -0.0075229 |
| MESDC2  | 0.00752271 |
| RNF146  | -0.0075204 |
| EIF1    | -0.0075187 |
| ADAD1   | -0.0075163 |
| MGAT4A  | -0.0075146 |
| IMMT    | 0.00750666 |
| PLEK    | -0.0075012 |
| MDGA2   | 0.00749981 |
| ZBTB22  | 0.0074969  |
| KLHL5   | -0.007496  |

|          |            |
|----------|------------|
| NKAIN1   | -0.0074958 |
| IRF7     | -0.0074927 |
| CDC42BPA | -0.0074886 |
| PRMT5    | 0.00748862 |
| SUMO3    | 0.00748614 |
| NDUFA8   | -0.0074857 |
| KRIT1    | -0.0074856 |
| GLRX     | -0.0074842 |
| RBBP5    | 0.00748331 |
| MPP1     | -0.0074803 |
| PPAP2B   | -0.0074792 |
| RBM34    | 0.00747776 |
| FYCO1    | -0.0074766 |
| PLBD2    | -0.0074732 |
| PROSC    | 0.0074703  |
| PRR5     | 0.00746879 |
| LYRM2    | -0.0074651 |
| B4GALT1  | -0.0074647 |
| DAGLA    | -0.0074569 |
| RAD17    | 0.00745681 |
| CTSO     | -0.007448  |
| NUDT14   | 0.00744799 |
| MEPCE    | -0.0074479 |
| TCP11L1  | -0.0074414 |
| UCK1     | 0.00743459 |
| GPR63    | 0.00743234 |
| DDX47    | 0.00743087 |
| TTC19    | -0.0074252 |
| TMOD2    | -0.0074242 |
| CYB561D2 | -0.007419  |
| PNKD     | -0.0074176 |
| VCPIP1   | -0.0074152 |
| PHPT1    | -0.0074143 |
| ANKRD46  | 0.00741403 |
| TWSG1    | -0.0074121 |
| CHMP2B   | -0.0074107 |
| ULK1     | -0.0074082 |
| TTC39C   | -0.0074071 |
| API5     | -0.0074046 |
| CEP55    | 0.00740427 |
| MAML1    | -0.0074041 |
| COX4I1   | 0.00739433 |

|          |            |
|----------|------------|
| EP300    | -0.0073939 |
| BNIP3L   | -0.007393  |
| GAPDH    | 0.00739145 |
| PPP1R16A | 0.00738872 |
| CD63     | 0.00738211 |
| WHSC1    | 0.00738026 |
| TRIM36   | -0.0073777 |
| STK4     | 0.00737545 |
| TYRO3    | -0.0073749 |
| TRMT61A  | 0.00737299 |
| RGMA     | -0.0073724 |
| BTG2     | -0.007372  |
| GMDS     | -0.0073711 |
| MYPOP    | -0.0073709 |
| POLR2H   | 0.00736032 |
| RPAP1    | 0.00735945 |
| SNX19    | -0.0073569 |
| NUP54    | 0.00735594 |
| ISM1     | -0.0073557 |
| GAR1     | 0.00735304 |
| DHX40    | -0.0073526 |
| PRMT3    | 0.00734857 |
| VPS37A   | -0.0073431 |
| TTC1     | 0.00734114 |
| MBD1     | -0.0073396 |
| METTL8   | 0.0073376  |
| PDCD6    | 0.00733692 |
| RCAN1    | -0.0073341 |
| CCDC84   | -0.0073331 |
| TMEM131  | -0.0073313 |
| AKT1     | 0.00733045 |
| LYN      | -0.0073304 |
| SFMBT2   | -0.007327  |
| PIAS1    | -0.0073251 |
| IDH2     | 0.00732386 |
| DDX11    | 0.00732192 |
| ATXN7    | -0.0073195 |
| HOXA2    | -0.0073189 |
| PUS7L    | 0.00731844 |
| MEST     | 0.00731436 |
| PRDX2    | 0.00730994 |
| MAPK8IP1 | -0.0073096 |

|          |            |
|----------|------------|
| PHC1     | -0.0073092 |
| ZYX      | -0.0073034 |
| RASA3    | -0.0073029 |
| TAGLN3   | -0.0073022 |
| PASK     | 0.00730134 |
| SLC9A1   | 0.00729715 |
| RALGPS2  | -0.007297  |
| LNPEP    | -0.0072944 |
| BRD4     | -0.0072939 |
| TDP1     | 0.00728864 |
| TTYH3    | -0.0072872 |
| BACE1    | -0.0072861 |
| YEATS4   | -0.0072859 |
| PKIG     | -0.0072803 |
| TYK2     | -0.0072764 |
| TUBGCP6  | 0.00727619 |
| HYAL2    | 0.00727122 |
| SEMA3F   | -0.0072676 |
| POLB     | 0.00725714 |
| DIXDC1   | 0.00725678 |
| TMEM14A  | -0.0072564 |
| MAST4    | -0.0072548 |
| FAM189A1 | 0.0072536  |
| NQO2     | -0.0072531 |
| LAYN     | -0.0072482 |
| ATP6V0D1 | -0.0072465 |
| DBNL     | 0.00724551 |
| CIZ1     | -0.0072451 |
| ARAP1    | -0.0072441 |
| OSBP     | -0.0072344 |
| SEC63    | -0.0072333 |
| CDKN3    | 0.00722033 |
| SCO1     | 0.00721926 |
| ANAPC2   | 0.00721922 |
| SERINC1  | -0.0072185 |
| KIF3B    | -0.0072182 |
| SASS6    | 0.00721474 |
| TGFBRAP1 | -0.0072143 |
| TCF4     | -0.0072123 |
| SNTA1    | -0.0072121 |
| ADA      | 0.00720377 |
| FN3KRP   | 0.00720071 |

|         |            |
|---------|------------|
| FBXL20  | -0.0072005 |
| RPN2    | 0.00720026 |
| PRKAB2  | 0.00719861 |
| THAP1   | 0.00719523 |
| PI4KA   | -0.0071943 |
| KIFC3   | -0.0071933 |
| TMEM65  | -0.007193  |
| PLXNB1  | -0.0071927 |
| SSFA2   | -0.0071921 |
| SDC1    | 0.00718979 |
| ABHD4   | -0.0071862 |
| CCDC159 | -0.007185  |
| PCM1    | -0.0071799 |
| PDZD11  | -0.0071782 |
| PSTPIP2 | -0.0071776 |
| FZD8    | 0.00717697 |
| MDM1    | -0.0071751 |
| DPY19L4 | -0.0071748 |
| RPLP2   | 0.00717468 |
| RCOR1   | -0.0071731 |
| CASP7   | -0.007173  |
| NOM1    | 0.00716499 |
| TDP2    | 0.00716112 |
| SPOP    | -0.007158  |
| DNAJC4  | -0.0071572 |
| RBM5    | -0.0071563 |
| B4GALT6 | -0.0071561 |
| SFXN5   | 0.00715528 |
| STK11   | -0.0071534 |
| SLC27A3 | -0.0071484 |
| FAM195B | 0.0071476  |
| SLC5A2  | -0.0071454 |
| DDX1    | 0.00714263 |
| FAM105A | -0.0071421 |
| NEK1    | -0.0071395 |
| PLEKHJ1 | 0.00713095 |
| FNDC3A  | -0.00713   |
| APBB3   | 0.00712886 |
| THRA    | -0.0071287 |
| EBF3    | -0.0071274 |
| WISP3   | 0.00712104 |
| FBXW7   | -0.0071206 |

|          |            |
|----------|------------|
| RBM38    | 0.00711941 |
| FBXL2    | -0.0071186 |
| GRK6     | -0.0071145 |
| HAND2    | 0.00711419 |
| RPS13    | 0.00711331 |
| PCDHGC3  | -0.0071115 |
| FAM54A   | 0.00711148 |
| FBXL18   | 0.00710781 |
| DYRK1B   | -0.0071048 |
| SEMA4B   | -0.0071022 |
| PHACTR3  | -0.0070987 |
| UACA     | -0.0070975 |
| DENND5B  | 0.00709746 |
| PIGY     | 0.00709618 |
| NAPG     | 0.00709579 |
| DTNB     | -0.0070953 |
| TNFRSF1A | 0.00709511 |
| SACS     | 0.00709471 |
| EXOSC3   | -0.0070847 |
| DHPS     | 0.0070818  |
| CDC37L1  | -0.0070784 |
| TMEM120B | 0.00706839 |
| SERTAD2  | -0.0070676 |
| PLXNA1   | -0.0070676 |
| FDX1L    | 0.00706706 |
| KCNC3    | -0.0070656 |
| TTC17    | -0.007064  |
| KIRREL   | -0.0070628 |
| FAM117B  | -0.0070616 |
| TGFBR2   | -0.0070606 |
| PCIF1    | -0.00705   |
| CNRIP1   | -0.0070487 |
| DUSP19   | -0.0070474 |
| HADHB    | -0.007041  |
| TMEM47   | 0.00704079 |
| RALGAPA2 | -0.0070403 |
| PLSCR3   | -0.0070398 |
| DCTD     | 0.00703896 |
| TIMM10   | 0.0070381  |
| SLC1A4   | 0.00703608 |
| PTPN11   | -0.0070343 |
| VPS26B   | -0.0070324 |

|            |            |
|------------|------------|
| EBP        | 0.00703234 |
| UQCRH      | -0.0070299 |
| FAM118A    | 0.00702812 |
| EHD2       | -0.007027  |
| MCM3       | 0.00702276 |
| LRRC16A    | -0.0070224 |
| G3BP2      | 0.00702144 |
| ANKRD16    | -0.0070195 |
| SRRM2      | -0.0070146 |
| VPS8       | 0.0070122  |
| SNX30      | -0.0070095 |
| PUSL1      | 0.00700651 |
| SETX       | -0.0070045 |
| CNST       | -0.0070043 |
| CSGALNACT2 | -0.0070031 |
| MAP2K4     | -0.0069988 |
| NOTUM      | -0.0069973 |
| SEC22A     | -0.0069966 |
| CERK       | -0.0069932 |
| GNG11      | 0.00699234 |
| DACH2      | -0.0069904 |
| SLC36A4    | -0.00699   |
| SNX18      | -0.0069899 |
| CMTM3      | -0.0069888 |
| SSX2IP     | -0.0069861 |
| HEBP2      | -0.0069819 |
| IRAK1BP1   | -0.006973  |
| STXBP1     | -0.0069711 |
| STAG1      | -0.0069637 |
| ARHGEF40   | -0.0069631 |
| ELOVL2     | 0.00696289 |
| PEX13      | -0.0069624 |
| WNT7A      | -0.0069605 |
| ITGB5      | -0.0069602 |
| ARL4C      | -0.0069557 |
| KCNIP4     | -0.0069528 |
| CBR4       | -0.0069504 |
| ADHFE1     | 0.00694984 |
| SRPK1      | 0.00694708 |
| GADD45GIP1 | 0.00694372 |
| PSMG2      | 0.00694332 |
| CTDSPL2    | -0.0069421 |

|            |            |
|------------|------------|
| STIM1      | -0.0069418 |
| PDE5A      | -0.0069397 |
| HSD3B7     | -0.0069376 |
| MYCBP2     | -0.006937  |
| MCAM       | -0.006936  |
| ERAP1      | -0.0069354 |
| TMEM127    | -0.0069252 |
| IQCG       | -0.0069215 |
| GMPR2      | -0.0069147 |
| PTPN7      | 0.00691436 |
| CLOCK      | -0.0069138 |
| MCL1       | -0.0069104 |
| DIP2B      | -0.0069092 |
| GLO1       | 0.00690839 |
| ARHGAP44   | -0.0069068 |
| RIOK1      | 0.00690412 |
| TXNDC11    | -0.0069015 |
| CCNB1      | 0.00690123 |
| ARHGAP17   | -0.0068989 |
| SMTNL2     | -0.0068929 |
| PTBP2      | -0.0068922 |
| PPARD      | -0.0068919 |
| GPR19      | 0.00689055 |
| ERCC6L     | 0.00688974 |
| TFB2M      | 0.00688763 |
| APBB1      | 0.00688507 |
| ARL15      | -0.0068842 |
| GRHPR      | 0.00688361 |
| RASA1      | -0.0068802 |
| CDS2       | -0.0068801 |
| DNAJC19    | 0.00687401 |
| WASL       | -0.0068739 |
| LBR        | 0.0068704  |
| TIRAP      | -0.0068694 |
| XAB2       | 0.00686856 |
| GGNBP2     | -0.006867  |
| TMEM86A    | -0.006862  |
| SPAG9      | -0.0068616 |
| ST6GALNAC4 | 0.00686092 |
| KIF1C      | -0.0068566 |
| ARPC1A     | -0.0068564 |
| PPP1R12A   | -0.0068563 |



|          |            |
|----------|------------|
| SMAD2    | -0.0068552 |
| XYLB     | -0.0068539 |
| OGFR     | 0.00685179 |
| EPHX2    | -0.0068491 |
| ATG14    | -0.0068398 |
| SETD5    | -0.0068393 |
| ARSK     | -0.0068387 |
| KLF10    | 0.00683253 |
| BCAM     | -0.0068227 |
| HMOX1    | -0.0068177 |
| ARHGEF16 | -0.0068174 |
| PARP3    | -0.0068168 |
| SPHK2    | 0.00681364 |
| SH3TC1   | 0.00681279 |
| RNF169   | -0.0068063 |
| NDST1    | -0.0068055 |
| SLC25A19 | 0.00680309 |
| SMYD5    | -0.0067995 |
| PRPF40B  | -0.0067984 |
| GEMIN6   | 0.00679812 |
| MCM4     | 0.00679589 |
| AXIN1    | -0.0067875 |
| SOCS4    | 0.00678752 |
| CEP68    | 0.00678433 |
| SLC24A6  | -0.0067792 |
| ADIPOR2  | -0.0067788 |
| MARK4    | -0.0067746 |
| REEP2    | 0.00677036 |
| OTUD4    | 0.00676936 |
| CHMP2A   | -0.0067686 |
| RMND1    | -0.0067679 |
| IP6K2    | -0.0067668 |
| TRPM4    | -0.006762  |
| SOWAHB   | -0.0067588 |
| DLC1     | 0.00675778 |
| FRRS1    | -0.0067533 |
| WRB      | 0.00675067 |
| CD109    | -0.0067447 |
| ASF1B    | 0.00674468 |
| WARS2    | 0.00674077 |
| YLPM1    | -0.0067396 |
| DDB1     | 0.00673871 |

|          |            |
|----------|------------|
| SCN2B    | 0.0067387  |
| CCNL1    | -0.006738  |
| RHOF     | -0.0067349 |
| RFC1     | 0.00673334 |
| DDX10    | 0.00673249 |
| PORCN    | -0.0067308 |
| TNRC18   | -0.0067287 |
| LARS     | 0.00672702 |
| GLYCTK   | -0.0067235 |
| CNIH4    | -0.0067233 |
| GGA3     | 0.00672311 |
| DHX58    | -0.0067222 |
| TLK2     | -0.006721  |
| MAP3K2   | -0.0067179 |
| CBX3     | 0.00671406 |
| HUNK     | -0.006709  |
| GLT25D1  | -0.0067055 |
| ADAMTS15 | -0.0067042 |
| PTPRK    | -0.0067027 |
| BRMS1L   | -0.0067018 |
| BMP4     | -0.0067009 |
| VEGFC    | -0.0067005 |
| RPL18    | 0.00669919 |
| TFAM     | 0.00669834 |
| NECAB3   | -0.0066968 |
| CTDNEP1  | -0.0066933 |
| ALDH5A1  | -0.0066925 |
| TMEM184A | -0.0066899 |
| LMX1A    | -0.0066873 |
| MTERFD2  | -0.0066841 |
| ANKIB1   | -0.0066827 |
| CCDC50   | -0.0066818 |
| LPIN1    | -0.006679  |
| POLQ     | 0.00667701 |
| ZFYVE1   | -0.0066734 |
| VWA3A    | 0.00667182 |
| PKD2     | -0.006669  |
| SEL1L    | -0.0066673 |
| MICALL2  | -0.0066667 |
| PARP8    | -0.0066635 |
| ARL4A    | -0.0066612 |
| RARB     | -0.0066601 |

|          |            |
|----------|------------|
| LRIG3    | -0.0066601 |
| SPR      | 0.0066592  |
| RBM39    | -0.0066583 |
| PDZD4    | -0.0066578 |
| RFTN2    | -0.0066575 |
| NUSAP1   | -0.0066569 |
| RABEPK   | 0.00665621 |
| FKBP1B   | -0.0066497 |
| UBIAD1   | 0.00663756 |
| NCSTN    | -0.0066358 |
| ST3GAL2  | -0.0066346 |
| MAPK8IP2 | -0.0066317 |
| SUPV3L1  | 0.0066308  |
| PTGIS    | 0.00662861 |
| ZRANB3   | 0.00662422 |
| EIF3H    | 0.00662394 |
| ELAC1    | 0.00662268 |
| ARHGAP29 | -0.0066156 |
| KLHL4    | -0.0066146 |
| PDE1B    | 0.00661138 |
| NPDC1    | 0.00661044 |
| PRCC     | -0.0066088 |
| ADC      | -0.006608  |
| GSPT2    | 0.0066062  |
| HDAC8    | -0.0066029 |
| TACC2    | -0.0066014 |
| MAP3K13  | -0.0066006 |
| CFLAR    | -0.0065965 |
| FGD5     | -0.0065961 |
| LYRM1    | -0.0065954 |
| PAK1IP1  | 0.00659246 |
| TBC1D8   | -0.0065891 |
| KIF23    | -0.0065819 |
| KDM6B    | -0.0065819 |
| KIF15    | 0.00658148 |
| SASH1    | -0.0065763 |
| HAUS2    | 0.00657572 |
| LIPE     | -0.0065756 |
| THRAP3   | -0.0065756 |
| ADCK3    | -0.0065754 |
| FAM45A   | -0.0065748 |
| KLC2     | 0.00657429 |

|          |            |
|----------|------------|
| DLGAP4   | -0.0065719 |
| USP3     | -0.0065679 |
| DHX36    | -0.0065665 |
| CDK4     | 0.00656554 |
| DCLRE1C  | -0.0065629 |
| THOC2    | -0.0065598 |
| YARS     | 0.00655682 |
| CDC7     | 0.00655639 |
| POLR3E   | 0.00655467 |
| AP3D1    | -0.0065516 |
| B4GALNT4 | -0.0065507 |
| DAK      | 0.00655036 |
| SSU72    | 0.00654687 |
| E2F3     | 0.006545   |
| SIRT7    | 0.00654409 |
| CDKL3    | -0.0065423 |
| MED14    | -0.0065371 |
| HERC3    | -0.0065343 |
| NAPB     | -0.0065337 |
| ORC5     | 0.0065316  |
| MYO9B    | -0.0065297 |
| RPRD2    | -0.0065266 |
| KIF20A   | 0.00651703 |
| MAEA     | 0.00651692 |
| RNF130   | -0.0065163 |
| CABIN1   | -0.0065152 |
| PSMD11   | 0.00651511 |
| PPPDE1   | 0.00651144 |
| UTP23    | 0.00650978 |
| MTX2     | -0.0065082 |
| AGPAT1   | 0.00650817 |
| MRPL52   | -0.0065042 |
| MTMR1    | -0.0064993 |
| TIPRL    | 0.00649592 |
| FAM96B   | 0.0064933  |
| TTC8     | -0.0064911 |
| SOS2     | -0.0064852 |
| FAHD1    | -0.006485  |
| HEMGN    | -0.0064796 |
| B3GALT1  | -0.0064793 |
| DAGLB    | 0.00647887 |
| TIPARP   | 0.00647814 |

|          |            |
|----------|------------|
| PDGFRB   | -0.0064781 |
| AAAS     | 0.00647722 |
| DUSP9    | 0.0064757  |
| DSTYK    | -0.0064743 |
| TRPS1    | 0.00646877 |
| FAM57A   | 0.00646736 |
| LYPD6B   | -0.0064658 |
| SLC39A8  | -0.0064623 |
| MSTO1    | 0.00645965 |
| CPOX     | 0.00645865 |
| SLC16A2  | -0.0064578 |
| TRIP11   | -0.0064571 |
| STAU1    | -0.006454  |
| ZMAT3    | -0.0064516 |
| ANLN     | 0.00645028 |
| AKAP12   | -0.0064493 |
| ARHGAP21 | -0.0064469 |
| DALRD3   | -0.0064467 |
| EAF1     | 0.00644362 |
| ARMC9    | 0.00644218 |
| SH3TC2   | -0.0064396 |
| KANK4    | 0.00643844 |
| KRR1     | 0.00643425 |
| SERAC1   | -0.006433  |
| SHD      | -0.0064293 |
| TXNDC5   | 0.00642713 |
| DENND1B  | 0.00642456 |
| CSAD     | 0.00642431 |
| ATXN7L2  | -0.0064224 |
| PPIL1    | 0.00642217 |
| FBXO4    | -0.0064167 |
| IGHMBP2  | -0.0064163 |
| PAN3     | -0.0064119 |
| CDK18    | -0.0064106 |
| GDI2     | -0.0064105 |
| MPRIP    | -0.0064097 |
| PCCB     | -0.0064097 |
| BCS1L    | -0.0064097 |
| PAG1     | -0.0064066 |
| LDLRAP1  | -0.0064057 |
| IKZF5    | 0.00640551 |
| TCTA     | -0.0064044 |

|           |            |
|-----------|------------|
| NLN       | 0.0063997  |
| ASXL1     | -0.0063991 |
| PARP1     | 0.00639528 |
| ZC3H12B   | -0.0063931 |
| CHPT1     | -0.0063875 |
| SMAD6     | -0.0063839 |
| SYNGR2    | 0.00638292 |
| DPH3      | 0.00638234 |
| GTF2E1    | 0.00638107 |
| FLOT2     | -0.0063794 |
| KLHDC4    | 0.00637837 |
| DENND4C   | -0.0063779 |
| CCDC136   | -0.0063759 |
| FUK       | -0.006375  |
| GPATCH8   | -0.0063748 |
| NCOR1     | -0.0063743 |
| CCDC14    | 0.00637017 |
| ELP4      | -0.006369  |
| TBC1D23   | -0.0063609 |
| RPL38     | 0.0063576  |
| NLK       | 0.0063573  |
| ELTD1     | 0.00635552 |
| TBC1D15   | 0.00635416 |
| GTF2E2    | 0.006354   |
| SRD5A3    | -0.0063535 |
| STX11     | 0.00635295 |
| YEATS2    | -0.0063499 |
| MRE11A    | 0.00634887 |
| KCTD2     | -0.0063472 |
| MFF       | -0.0063449 |
| NT5C3     | -0.0063414 |
| RANBP10   | -0.0063398 |
| ERCC5     | -0.0063361 |
| PCYOX1L   | 0.00633589 |
| LINGO1    | -0.0063309 |
| MRPS27    | 0.00633001 |
| CLASP1    | -0.006328  |
| KIDINS220 | -0.0063267 |
| TENC1     | -0.0063253 |
| PPIL3     | 0.00632372 |
| CLCN7     | 0.00631775 |
| SDF2      | -0.006317  |

|         |            |
|---------|------------|
| SNAP91  | -0.0063155 |
| PIK3C2B | -0.0063139 |
| PPID    | 0.00631383 |
| RPL22   | -0.0063136 |
| OSBPL2  | -0.0063061 |
| MTMR6   | -0.0063053 |
| LARGE   | -0.0063035 |
| PSMB3   | 0.00630202 |
| RBMS2   | -0.0063016 |
| URM1    | 0.00629566 |
| JMJD1C  | -0.0062936 |
| FAM173A | -0.0062889 |
| DHDDS   | -0.0062881 |
| BLMH    | 0.00628242 |
| TBKBP1  | 0.00628054 |
| PACSIN1 | -0.0062782 |
| PRKCD   | -0.006278  |
| VIPR2   | 0.00627359 |
| FAM105B | 0.00627033 |
| EIF2C2  | 0.00626833 |
| SHISA5  | 0.00626653 |
| MOSPD1  | -0.006264  |
| AP4S1   | -0.0062617 |
| ZDHHC1  | -0.0062602 |
| TMEM54  | 0.00625314 |
| TMEM38B | -0.0062525 |
| LMOD1   | 0.00625214 |
| MCTS1   | 0.00625112 |
| DUSP10  | -0.0062509 |
| LYST    | -0.0062506 |
| PDZD9   | 0.00625004 |
| GSS     | 0.00624065 |
| FBXW9   | 0.00624047 |
| MLEC    | -0.0062399 |
| DIS3L   | -0.0062392 |
| BTRC    | -0.0062391 |
| CRIP2   | 0.00623374 |
| POLI    | 0.00623208 |
| AARSD1  | 0.00623177 |
| VPS16   | -0.0062304 |
| ACTR5   | 0.00622817 |
| MAK16   | 0.00622788 |

|          |            |
|----------|------------|
| TFEB     | -0.0062265 |
| FAM129B  | -0.0062252 |
| KCTD1    | -0.0062236 |
| CLTC     | -0.0062232 |
| OSGEPL1  | -0.0062218 |
| EGFL8    | -0.0062177 |
| MMS22L   | 0.00621473 |
| CMBL     | 0.00621258 |
| ABCG2    | -0.0062098 |
| HDAC4    | -0.0062094 |
| NUP93    | 0.00620722 |
| FBXO30   | -0.0062043 |
| RAPGEF2  | -0.0062027 |
| DMTF1    | -0.0062007 |
| ZFYVE19  | 0.00619887 |
| DNAJA3   | 0.00619824 |
| TXLNA    | -0.0061969 |
| SLC12A6  | -0.0061928 |
| RFWD3    | 0.00618917 |
| FAM53B   | 0.00618777 |
| GFOD2    | 0.0061841  |
| GPRIN1   | 0.0061784  |
| GLE1     | -0.0061757 |
| YPEL4    | -0.006172  |
| SLC30A5  | 0.0061704  |
| SOCS5    | -0.0061657 |
| SLC25A28 | -0.006165  |
| STEAP3   | 0.00616338 |
| ALDH9A1  | 0.00615911 |
| FRMD6    | -0.0061581 |
| PMP22    | -0.0061567 |
| STK36    | -0.0061521 |
| NAPEPLD  | -0.0061506 |
| ASB1     | -0.0061494 |
| HOXC11   | -0.0061448 |
| FAM60A   | 0.00614304 |
| LRP6     | -0.0061427 |
| UBN1     | -0.0061422 |
| RBM14    | 0.00614181 |
| REST     | -0.0061418 |
| PDXDC1   | -0.0061416 |
| WAC      | -0.0061405 |



|         |            |
|---------|------------|
| RNF10   | -0.0061399 |
| SNX12   | -0.0061377 |
| PSMA3   | 0.00613528 |
| PHIP    | -0.0061304 |
| PCBD1   | 0.0061287  |
| ADH5    | 0.00612765 |
| BTBD10  | 0.00612105 |
| BTBD3   | -0.006118  |
| GPX1    | 0.00611478 |
| PLOD3   | -0.0061147 |
| ZBTB24  | -0.006114  |
| ARFRP1  | 0.00611149 |
| AP3B1   | -0.006109  |
| SEC23B  | 0.00610714 |
| SSR4    | 0.00610678 |
| LAMC1   | -0.0061049 |
| SORBS3  | -0.0061047 |
| GNL3L   | 0.00610223 |
| GINS3   | -0.0060932 |
| KCNA3   | 0.00609202 |
| RECK    | 0.00609028 |
| PDIK1L  | -0.0060897 |
| CABLES2 | -0.0060888 |
| ADCY6   | -0.0060845 |
| COPA    | -0.0060817 |
| HPS3    | 0.00607946 |
| TATDN2  | 0.00607908 |
| MCM2    | 0.00607252 |
| ADARB1  | 0.00606868 |
| TCF25   | -0.0060646 |
| DLL4    | 0.00606308 |
| ZCCHC8  | 0.00606236 |
| COX10   | 0.00606223 |
| SPAST   | -0.0060586 |
| NECAP2  | -0.0060544 |
| ADD3    | -0.0060537 |
| FICD    | -0.0060529 |
| SUV39H1 | 0.00605266 |
| SYT7    | -0.0060505 |
| DEF6    | -0.0060441 |
| SNX8    | 0.00604092 |
| FBXO18  | -0.0060406 |

|         |            |
|---------|------------|
| UBA3    | -0.0060366 |
| TRAFD1  | -0.006036  |
| ELL2    | -0.0060339 |
| BCKDHB  | 0.00602987 |
| SNRPD2  | 0.00602943 |
| METTL3  | 0.00602913 |
| SNX2    | -0.0060239 |
| ADCK5   | 0.00602379 |
| EPT1    | 0.00602159 |
| GARNL3  | -0.0060198 |
| DDX58   | -0.0060185 |
| CERCAM  | -0.0060166 |
| SNRPB2  | -0.0060139 |
| ATXN2   | -0.0060119 |
| SNRK    | -0.0060091 |
| DHX38   | 0.00600828 |
| STX8    | -0.0060077 |
| TSPAN18 | -0.0060077 |
| MAN1A2  | -0.0060036 |
| TIMP3   | -0.0060024 |
| CHFR    | -0.0060022 |
| SSR1    | 0.00599777 |
| TAF1A   | 0.0059942  |
| MRVI1   | -0.0059927 |
| PRPF39  | -0.0059924 |
| EFHC1   | -0.0059899 |
| ATP5H   | -0.0059896 |
| PHF16   | 0.00598913 |
| DYNLRB1 | -0.0059856 |
| CAMK2N2 | -0.0059849 |
| GCDH    | 0.00598224 |
| MAD2L1  | 0.00598085 |
| HACE1   | 0.00598071 |
| PPPDE2  | 0.00597869 |
| ARPC5L  | -0.0059779 |
| RNF44   | 0.00597687 |
| EIF4A2  | 0.00597496 |
| GIPC1   | 0.00597312 |
| ADSS    | 0.00597193 |
| PDE8B   | 0.00597088 |
| TRIB1   | 0.00597002 |
| NUP35   | 0.00596932 |

|          |            |
|----------|------------|
| KCNK5    | -0.0059669 |
| PDLIM1   | -0.0059604 |
| BIN1     | 0.00594994 |
| LSM3     | -0.0059464 |
| PRAF2    | 0.00594316 |
| CCNY     | -0.0059411 |
| MYSM1    | -0.0059408 |
| KLHL15   | -0.0059399 |
| ARHGAP27 | -0.0059383 |
| PTK7     | 0.00593537 |
| VSNL1    | 0.00593347 |
| NPHP3    | -0.0059335 |
| HIVEP1   | -0.0059322 |
| METTL15  | -0.0059244 |
| NDUFB3   | -0.0059243 |
| COTL1    | 0.00592152 |
| SUFU     | 0.00592042 |
| NCK2     | -0.00592   |
| RAD23B   | 0.00591955 |
| FLI1     | -0.0059167 |
| CREBZF   | -0.0059166 |
| ANKRA2   | -0.0059158 |
| SEC24B   | -0.0059132 |
| CHN1     | -0.005908  |
| MFSD4    | 0.0059062  |
| RIBC2    | 0.00590544 |
| PIK3CG   | -0.0059028 |
| GUF1     | 0.0059021  |
| MOB2     | 0.00590208 |
| RPS3A    | 0.00590118 |
| GJA1     | -0.0059002 |
| TWF2     | 0.00589996 |
| RTCD1    | 0.00589803 |
| ST3GAL6  | -0.0058952 |
| FUCA2    | -0.0058951 |
| SREK1IP1 | -0.0058915 |
| FAM70A   | -0.0058877 |
| NUP50    | 0.00588746 |
| ACSL6    | -0.0058863 |
| PIAS4    | -0.0058854 |
| RAD51C   | 0.00588291 |
| GPAM     | 0.00588206 |

|         |            |
|---------|------------|
| WDR90   | 0.00587805 |
| LUC7L2  | -0.0058755 |
| RNF5    | -0.0058754 |
| CPSF2   | 0.00587457 |
| CTNND1  | -0.0058745 |
| HECW2   | -0.0058741 |
| NKTR    | -0.0058737 |
| GLI2    | -0.0058737 |
| RAB28   | 0.00587219 |
| ANGPT2  | -0.0058678 |
| ATPAF1  | 0.00586773 |
| ADI1    | -0.0058677 |
| SLC43A1 | 0.0058664  |
| BEND3   | 0.00586629 |
| ALG5    | 0.0058521  |
| BCL2L13 | 0.00585139 |
| TXNDC9  | 0.00584863 |
| FCHO2   | -0.005848  |
| RNH1    | -0.0058468 |
| KIF5C   | -0.0058444 |
| CLIC4   | 0.0058412  |
| MTA3    | -0.0058381 |
| TRPM7   | -0.0058375 |
| SPATA6  | 0.00583569 |
| PHAX    | 0.0058325  |
| SFXN2   | 0.00583063 |
| NDUFS6  | 0.00582779 |
| DNAJC12 | 0.0058267  |
| CTSH    | -0.0058258 |
| ARID4A  | -0.005825  |
| HYI     | -0.0058246 |
| KLHL11  | 0.00581997 |
| ANXA7   | -0.0058182 |
| MLH3    | 0.00581706 |
| SUCLG2  | 0.00581616 |
| OCIAD1  | 0.0058143  |
| CEP57   | -0.0058137 |
| WDR65   | 0.00581348 |
| DPP8    | -0.0058128 |
| CENPO   | 0.00581195 |
| RIOK3   | -0.0058114 |
| ZZEF1   | -0.0058105 |

|            |            |
|------------|------------|
| UQCRQ      | 0.0058092  |
| MED30      | -0.005805  |
| NAA30      | -0.0058029 |
| TGFBR3     | -0.005802  |
| SLC11A2    | 0.00580145 |
| ATAD2B     | -0.0058011 |
| NXN        | 0.0057957  |
| ANKRD45    | 0.00579442 |
| NDUFA3     | 0.00579162 |
| RACGAP1    | 0.0057832  |
| DIRC2      | -0.0057829 |
| TSPAN9     | -0.0057812 |
| CAPN3      | -0.00578   |
| TRUB1      | 0.00577809 |
| ST6GALNAC5 | 0.00577613 |
| P2RY1      | 0.00577434 |
| POC5       | 0.00577249 |
| YIPF5      | -0.0057694 |
| UFSP1      | 0.00576841 |
| HOOK2      | -0.0057663 |
| PLEKHA8    | -0.0057648 |
| ADAM17     | -0.0057629 |
| RCAN3      | -0.0057586 |
| NDUFAB1    | -0.0057578 |
| ISPD       | -0.0057519 |
| RUFY1      | -0.0057517 |
| SNX33      | -0.0057504 |
| SNX14      | -0.0057484 |
| FTSD1      | 0.00574675 |
| ADCY4      | 0.00574414 |
| PRKAB1     | -0.0057414 |
| TMCO1      | 0.00574057 |
| DTD1       | 0.00573934 |
| AVEN       | 0.00573324 |
| MPND       | -0.005732  |
| SFSWAP     | -0.0057315 |
| GOLPH3L    | -0.0057311 |
| SIDT2      | -0.00573   |
| PRSS8      | -0.0057255 |
| DNAJB12    | -0.0057246 |
| SCCPDH     | -0.0057238 |
| PDP1       | -0.0057238 |

|            |            |
|------------|------------|
| SMC2       | 0.00572133 |
| KNTC1      | 0.00572055 |
| NSD1       | -0.0057201 |
| ERG        | -0.0057191 |
| CSRNP2     | -0.0057154 |
| ACVR2A     | -0.0057118 |
| CACNA1C    | -0.0057107 |
| PPIC       | -0.0057096 |
| DUT        | 0.00570794 |
| GNPDA2     | -0.0057072 |
| SLC25A29   | -0.0057066 |
| AIMP1      | 0.00570596 |
| REPS1      | -0.0057052 |
| USP49      | -0.005702  |
| ILK        | -0.0056944 |
| TMX4       | -0.0056936 |
| NUMB       | -0.0056922 |
| RPS6KA1    | -0.0056892 |
| CMAS       | -0.0056855 |
| KATNAL1    | -0.0056837 |
| RFESD      | 0.00567722 |
| ITPR1      | -0.0056749 |
| EWSR1      | -0.0056744 |
| RYK        | -0.0056734 |
| TRAPPC10   | -0.0056714 |
| TSPAN33    | 0.00566855 |
| RASIP1     | 0.00566591 |
| MED10      | 0.00566542 |
| FAM179B    | -0.0056644 |
| ALX1       | -0.0056636 |
| TIMP1      | -0.0056635 |
| ST6GALNAC6 | -0.0056628 |
| RBFOX1     | -0.0056601 |
| ERRFI1     | -0.0056574 |
| QTRTD1     | 0.00565195 |
| SLC26A2    | -0.0056516 |
| PSTPIP1    | 0.0056504  |
| CLCF1      | 0.00564926 |
| PRKRA      | 0.00564785 |
| JARID2     | -0.0056393 |
| TRMT112    | 0.00563709 |
| N6AMT2     | 0.00563612 |

|           |            |
|-----------|------------|
| RALBP1    | -0.0056333 |
| RAB11FIP1 | 0.0056313  |
| RSL24D1   | 0.00562458 |
| LAMA4     | 0.00562084 |
| SLC25A45  | 0.00561716 |
| ADAT1     | 0.00560131 |
| CDR2L     | 0.00559347 |
| ANKRD39   | -0.0055913 |
| HINT1     | 0.00558789 |
| CRY1      | 0.00558774 |
| ADPGK     | 0.00558377 |
| TJAP1     | 0.00558326 |
| RSRC2     | -0.0055805 |
| DLG5      | -0.0055768 |
| MARK1     | -0.0055765 |
| SRI       | -0.0055752 |
| COPB1     | -0.0055751 |
| NRK       | -0.0055734 |
| AHCYL2    | -0.0055716 |
| HIRIP3    | 0.00557164 |
| PRDX5     | -0.0055715 |
| TTC5      | -0.0055653 |
| LRRC33    | 0.00556452 |
| E2F7      | 0.00556374 |
| AEN       | 0.00555895 |
| ZBTB41    | -0.005556  |
| CHN2      | -0.0055555 |
| ANKRD27   | 0.00555368 |
| SLC6A9    | -0.0055521 |
| MMAA      | -0.0055502 |
| LCA5L     | 0.00554528 |
| MCAT      | 0.00554477 |
| TSTD2     | 0.00554467 |
| SMPD1     | -0.0055435 |
| RNF170    | -0.0055422 |
| CASC4     | -0.0055414 |
| LATS1     | -0.0055375 |
| MRPL55    | 0.00553743 |
| GAA       | -0.0055336 |
| ENSA      | -0.0055328 |
| MRPL37    | 0.00553239 |
| STAU2     | -0.0055316 |

|          |            |
|----------|------------|
| LIMD1    | 0.00553062 |
| ARL8A    | -0.0055281 |
| FBN2     | -0.0055244 |
| RPS6KB1  | -0.0055238 |
| USP51    | 0.00551425 |
| ABTB1    | -0.0055139 |
| HOXD3    | 0.0055136  |
| TSPAN5   | -0.0055106 |
| PDE3A    | -0.0055106 |
| OMA1     | -0.0055096 |
| TINAGL1  | 0.00550507 |
| ASPSCR1  | 0.00550191 |
| NAE1     | -0.0054993 |
| INPP5A   | -0.0054984 |
| FLT1     | -0.0054963 |
| MYBBP1A  | 0.00549548 |
| FRS2     | -0.0054905 |
| ERMP1    | -0.0054877 |
| HBS1L    | 0.00548762 |
| CAMK2A   | -0.0054876 |
| FUT11    | -0.0054873 |
| NVL      | 0.00548678 |
| GARS     | 0.0054864  |
| PPM1H    | 0.00548529 |
| NARFL    | 0.00548453 |
| TADA3    | -0.005482  |
| PANK1    | -0.0054804 |
| RPP30    | 0.00547042 |
| WIZ      | -0.0054681 |
| PURG     | -0.0054675 |
| SGCB     | 0.00545952 |
| NAA25    | 0.00545779 |
| MON2     | -0.005457  |
| ORAI3    | -0.0054569 |
| EXTL3    | -0.0054524 |
| TFG      | -0.0054501 |
| GMEB1    | -0.0054482 |
| SERPINI1 | -0.0054479 |
| TGIF2    | 0.00544731 |
| USP48    | -0.0054463 |
| NEK9     | -0.0054463 |
| AFTPH    | -0.0054458 |



|         |            |
|---------|------------|
| MOV10   | -0.0054343 |
| UGP2    | -0.0054319 |
| VPS13C  | -0.0054236 |
| RRP36   | 0.00542293 |
| METAP1D | -0.0054205 |
| STAG2   | -0.00542   |
| HTRA2   | 0.00541913 |
| TBC1D12 | -0.0054182 |
| DEGS1   | 0.00541284 |
| AP2S1   | 0.00541283 |
| MBNL3   | -0.0054084 |
| TPP1    | -0.0054066 |
| ALG12   | -0.0054004 |
| NDST2   | -0.005399  |
| CHMP6   | 0.0053987  |
| H2AFV   | -0.0053982 |
| PACS1   | -0.0053958 |
| TMEM19  | -0.0053942 |
| TMEM208 | 0.00539354 |
| XPO4    | 0.00539345 |
| FAM123A | 0.00539166 |
| GSTK1   | -0.0053905 |
| IGDCC4  | -0.0053891 |
| RNF2    | -0.0053877 |
| RICTOR  | -0.0053876 |
| TM2D2   | 0.0053864  |
| CCDC127 | -0.0053862 |
| PRKD3   | -0.0053834 |
| ACP6    | -0.0053808 |
| CAPRIN1 | 0.00537999 |
| HEATR5B | -0.0053704 |
| EIF4G3  | -0.0053686 |
| PRDM11  | -0.0053646 |
| NOP58   | 0.00536337 |
| GNS     | -0.0053567 |
| RAP1B   | -0.0053534 |
| SLC35F5 | -0.0053532 |
| EHD1    | 0.00535314 |
| TRMU    | 0.00534753 |
| MBTD1   | -0.0053469 |
| EXOG    | 0.00534644 |
| BRWD3   | -0.0053454 |

|          |            |
|----------|------------|
| P4HB     | 0.00534113 |
| ATP6AP2  | -0.0053395 |
| WDR25    | 0.00533911 |
| ACSM3    | -0.0053373 |
| SETDB2   | -0.0053349 |
| PNKP     | 0.00533209 |
| FAM122B  | -0.0053311 |
| SMYD4    | -0.0053303 |
| LIG1     | 0.00533018 |
| POLR3A   | 0.00532964 |
| CNNM2    | -0.0053259 |
| NFS1     | 0.00532414 |
| PLOD2    | -0.0053228 |
| RAB27A   | -0.0053211 |
| JMJD5    | 0.00532012 |
| UHMK1    | -0.0053135 |
| CCDC41   | 0.00531343 |
| SLC38A7  | -0.0053127 |
| MFGE8    | -0.0053112 |
| NDUFA1   | -0.0053109 |
| TEX9     | -0.0053028 |
| PEX14    | 0.00529798 |
| FAM160B1 | -0.0052932 |
| EIF3I    | 0.00529296 |
| FAM151B  | 0.00529127 |
| COX11    | -0.0052862 |
| METTL9   | -0.0052841 |
| JAG2     | 0.00528382 |
| TET3     | -0.0052803 |
| TOMM34   | 0.00527893 |
| FYTTD1   | -0.0052743 |
| PKD2L2   | -0.0052739 |
| RHBDD1   | -0.0052737 |
| HNRNPK   | 0.0052714  |
| HAUS7    | 0.0052712  |
| TFAP2A   | -0.005271  |
| LTN1     | 0.00526865 |
| SLC35A1  | -0.0052666 |
| TSGA10   | 0.00526425 |
| CS       | 0.00525755 |
| JOSD1    | 0.00525438 |
| IMPAD1   | -0.0052543 |

|          |            |
|----------|------------|
| THSD1    | 0.00525316 |
| TBRG4    | 0.0052525  |
| ZSWIM3   | 0.00524862 |
| NOTCH4   | -0.0052455 |
| BRIP1    | -0.0052449 |
| GSK3B    | -0.0052444 |
| PEX5     | -0.0052409 |
| CSF1     | -0.0052402 |
| HUWE1    | -0.0052394 |
| MANBAL   | -0.0052355 |
| ARL5A    | -0.0052331 |
| FBXL19   | 0.00523203 |
| PRR11    | 0.00523146 |
| CPEB3    | 0.00523101 |
| GANC     | -0.0052289 |
| MRPL35   | 0.00522876 |
| SBK1     | -0.0052271 |
| PTRH2    | -0.0052271 |
| PARD3    | -0.0052237 |
| ETFA     | -0.0052169 |
| GGCX     | -0.0052129 |
| LZTR1    | 0.00521213 |
| CCDC57   | 0.00521165 |
| ATRIP    | 0.00521029 |
| NFATC2IP | 0.00521028 |
| YY2      | 0.00520935 |
| ELOVL4   | -0.0052006 |
| NTPCR    | -0.0051989 |
| TMEM229B | -0.0051978 |
| HAUS6    | 0.00519717 |
| TTC12    | 0.00519567 |
| OS9      | -0.0051935 |
| SMAD7    | -0.0051854 |
| TDG      | 0.00518335 |
| DEPDC5   | -0.0051826 |
| ITGB3BP  | 0.00518178 |
| RCE1     | 0.00518061 |
| EEF1A1   | 0.00518034 |
| IQGAP2   | -0.0051789 |
| PGRMC1   | 0.00517809 |
| NDUFB7   | 0.00517631 |
| SOCS6    | 0.00517625 |

|          |            |
|----------|------------|
| ASF1A    | -0.0051705 |
| ZBTB42   | -0.0051696 |
| PDE4D    | -0.0051689 |
| NUP37    | 0.00515645 |
| ATP6V1C2 | 0.00515464 |
| SWAP70   | 0.0051502  |
| XPNPEP1  | 0.00514596 |
| CAMKV    | 0.00514544 |
| FILIP1   | 0.00514454 |
| BFAR     | -0.005144  |
| THUMPD2  | -0.0051369 |
| EFCAB4A  | -0.0051369 |
| UBE2V2   | 0.00513594 |
| LRRC16B  | -0.005135  |
| NDUFB10  | -0.0051347 |
| CXADR    | -0.0051296 |
| IAH1     | 0.00512877 |
| PSEN1    | 0.00512454 |
| WTAP     | -0.0051189 |
| CARHSP1  | 0.00511654 |
| DSEL     | -0.0051165 |
| CAND2    | -0.0051148 |
| FSD1L    | -0.0051147 |
| ETF1     | 0.00510926 |
| SPATA13  | -0.0051093 |
| MPST     | -0.0051089 |
| SFXN1    | -0.0051089 |
| OTUD7B   | -0.0051074 |
| GPR124   | -0.0051065 |
| SGTB     | -0.0051057 |
| TRAF3    | -0.0051053 |
| EPC2     | -0.0051048 |
| FANCB    | 0.00510274 |
| RNLS     | 0.00510267 |
| TTC33    | -0.0050951 |
| UBE2T    | 0.00509408 |
| KCTD3    | 0.00509176 |
| DEAF1    | -0.0050885 |
| FLOT1    | -0.005086  |
| HBEGF    | -0.0050852 |
| PAN2     | -0.0050842 |
| PDAP1    | -0.0050797 |

|         |            |
|---------|------------|
| DIS3L2  | -0.0050763 |
| PKIA    | -0.0050759 |
| LANCL2  | -0.0050708 |
| GNB2L1  | 0.00507032 |
| TRIM8   | -0.0050692 |
| HNRNPU  | -0.0050644 |
| RSPRY1  | -0.0050635 |
| IDH3G   | -0.005063  |
| GAPVD1  | -0.0050619 |
| ACADS   | 0.00506127 |
| SLC10A3 | -0.0050599 |
| SNX6    | -0.0050581 |
| VPS53   | -0.005054  |
| CHTF18  | 0.00505386 |
| LAMTOR3 | 0.00505322 |
| FBXO3   | -0.0050524 |
| STX6    | -0.005051  |
| CCDC40  | 0.00504874 |
| PSMA7   | 0.00504526 |
| TTC14   | -0.0050412 |
| GOLGA3  | -0.0050395 |
| ATG16L1 | 0.0050373  |
| POMT1   | 0.00503598 |
| SF3B2   | -0.0050338 |
| TTPAL   | -0.0050338 |
| KDEL2   | 0.00503203 |
| CAPZA1  | -0.0050312 |
| SLC35A3 | 0.00502802 |
| GMPR    | -0.0050266 |
| TMEM115 | 0.00502552 |
| WIPF2   | -0.0050255 |
| PELP1   | -0.0050233 |
| IPO13   | 0.00502178 |
| CDK17   | -0.005018  |
| MRPL9   | 0.00501125 |
| WDR47   | -0.0050095 |
| FOXRED2 | 0.00500478 |
| IKBKB   | -0.0049998 |
| DOM3Z   | -0.0049927 |
| ICK     | -0.0049924 |
| MATR3   | -0.0049857 |
| SEC24C  | 0.00498537 |

|          |            |
|----------|------------|
| GPR180   | -0.0049853 |
| SOD2     | 0.00497422 |
| C1GALT1  | -0.004974  |
| GAS2L3   | -0.0049647 |
| TMC7     | 0.00496319 |
| NDUFS1   | 0.00496174 |
| NR4A2    | -0.0049556 |
| EFNB3    | -0.0049554 |
| MUT      | 0.00495382 |
| FKBP15   | -0.0049526 |
| PIGX     | -0.0049524 |
| DBP      | -0.0049476 |
| MOCS2    | -0.0049464 |
| GLRX3    | 0.00494621 |
| ARHGAP12 | 0.00494173 |
| TM9SF4   | 0.00493905 |
| FYN      | -0.0049371 |
| BBS10    | -0.004934  |
| WDR36    | 0.00493051 |
| UBE2S    | 0.00492698 |
| TAF1C    | 0.00492695 |
| STXBP4   | -0.0049237 |
| ZDHHC2   | 0.00492086 |
| DCTN1    | -0.0049193 |
| CGGBP1   | -0.0049187 |
| WDR53    | 0.00491846 |
| FRZB     | -0.0049178 |
| FGD4     | -0.0049176 |
| MICAL2   | -0.0049174 |
| WWP1     | -0.0049135 |
| FAM83G   | -0.0049094 |
| FLII     | -0.0049088 |
| PIP4K2C  | 0.00490634 |
| ASB3     | -0.0049052 |
| AFAP1L1  | -0.0049039 |
| TTC37    | 0.00490338 |
| GTPBP4   | 0.00490275 |
| SNRPD3   | 0.00490254 |
| SEC61B   | -0.0049015 |
| NUPL2    | 0.00489232 |
| LOXL4    | 0.00488899 |
| FBXO25   | -0.0048861 |

|         |            |
|---------|------------|
| EIF3M   | 0.00488338 |
| PANX1   | -0.0048808 |
| POP5    | 0.00487982 |
| MRPL13  | 0.00487729 |
| COX7C   | 0.00487027 |
| RABGGTA | 0.00486893 |
| TMEM87A | -0.0048675 |
| MARK2   | -0.004866  |
| CCDC72  | -0.0048641 |
| CIRBP   | -0.004862  |
| ARMC1   | 0.00485835 |
| BAP1    | 0.00485141 |
| TMEM135 | -0.0048499 |
| MRC2    | -0.0048491 |
| FANCC   | 0.00484866 |
| ADAM9   | 0.00484617 |
| DDX17   | -0.0048369 |
| SF3B1   | -0.004836  |
| ZWINT   | 0.00483397 |
| AFMID   | 0.00483257 |
| ACSL5   | -0.0048304 |
| SLC38A1 | 0.00483027 |
| ACO1    | -0.0048283 |
| CNPY3   | 0.00482781 |
| ASRGL1  | 0.00482698 |
| SPG11   | -0.0048261 |
| ARMC5   | 0.00482513 |
| HARBI1  | 0.00482358 |
| ZCCHC10 | 0.00482277 |
| ECI2    | 0.00482269 |
| PIGQ    | 0.00482145 |
| TAF12   | 0.00482111 |
| TRMT11  | 0.00481961 |
| LSM14B  | -0.0048182 |
| DVL3    | -0.0048174 |
| HDDC3   | -0.0048169 |
| INVS    | -0.0048163 |
| SS18L1  | -0.0048123 |
| ITGA6   | -0.0048118 |
| DUSP23  | 0.00480907 |
| OSBPL1A | -0.0048016 |
| NBR1    | -0.0048014 |

|         |            |
|---------|------------|
| FHIT    | -0.0047987 |
| NFATC1  | 0.00479751 |
| TPD52   | -0.0047941 |
| PIK3CB  | -0.0047916 |
| FAM50A  | -0.0047909 |
| GREB1L  | 0.00478745 |
| ADAM19  | -0.0047837 |
| POFUT2  | -0.0047831 |
| TNS3    | -0.0047827 |
| FCHSD2  | -0.0047819 |
| RSPH9   | 0.0047815  |
| PLA2G6  | 0.0047811  |
| DDX18   | 0.00477976 |
| COX4NB  | 0.00477938 |
| HMGB2   | 0.00477891 |
| PITRM1  | 0.00477841 |
| CSNK1D  | -0.0047768 |
| PTP4A2  | -0.0047751 |
| ZSWIM6  | -0.0047748 |
| SAMHD1  | -0.0047736 |
| TMPO    | 0.00477363 |
| RAB5A   | 0.00477152 |
| ACADM   | 0.00476187 |
| NUS1    | 0.00476118 |
| SSBP3   | 0.00475928 |
| NARF    | -0.0047591 |
| WWOX    | -0.0047563 |
| YIPF1   | 0.00475362 |
| ADNP    | -0.0047469 |
| TMEM82  | -0.0047451 |
| PCGF3   | -0.0047435 |
| TMEM9   | -0.0047416 |
| ANK3    | -0.0047387 |
| MGAT4B  | 0.00473871 |
| BGN     | -0.0047372 |
| SAP18   | 0.00473241 |
| LZTFL1  | 0.00472829 |
| ST5     | -0.0047255 |
| DOLK    | 0.00472482 |
| SCP2    | -0.0047247 |
| ANKRD54 | 0.00472283 |
| GPATCH4 | 0.00472234 |



|          |            |
|----------|------------|
| SMARCD2  | 0.00472086 |
| POLRMT   | 0.0047174  |
| ING4     | -0.0047169 |
| SRSF6    | 0.00471586 |
| GADD45G  | -0.0047157 |
| BVES     | 0.00471277 |
| TMTC4    | -0.00471   |
| BPHL     | -0.0047081 |
| SMCR7L   | 0.00470596 |
| EDC4     | 0.0047059  |
| FOXN3    | -0.0047013 |
| NECAP1   | 0.00470051 |
| CLIP1    | -0.0047    |
| CSNK1G1  | -0.0046989 |
| GATAD1   | -0.0046979 |
| BANP     | -0.0046973 |
| PHKG2    | -0.0046943 |
| CRABP2   | 0.00469381 |
| CYP20A1  | 0.00468918 |
| DCLRE1A  | 0.00468841 |
| MAU2     | -0.0046879 |
| SCNM1    | -0.004684  |
| PSMD7    | 0.00468249 |
| THYN1    | -0.0046796 |
| GPR137B  | 0.00467869 |
| GPC1     | 0.00467838 |
| LPAR2    | -0.0046779 |
| BYSL     | 0.00467621 |
| BCL7A    | 0.00467598 |
| COPS3    | 0.00467343 |
| SLC25A35 | -0.0046731 |
| NTNG2    | 0.00467105 |
| PSIP1    | 0.00467073 |
| LRP12    | -0.0046673 |
| MET      | -0.0046666 |
| TFCP2    | -0.004666  |
| TICAM1   | -0.0046657 |
| SLC35D2  | -0.0046628 |
| CCDC142  | -0.0046627 |
| ZNHIT6   | 0.00466059 |
| RPS23    | 0.00466003 |
| ZFYVE9   | -0.0046597 |

|          |            |
|----------|------------|
| DGKQ     | -0.0046571 |
| PLCG1    | -0.0046569 |
| MYEF2    | 0.00465621 |
| CD97     | 0.004656   |
| BRPF1    | -0.0046538 |
| UBXN4    | -0.0046538 |
| EEF1E1   | 0.00465089 |
| SEMA3E   | -0.0046507 |
| PGRMC2   | -0.0046507 |
| LSM11    | 0.00464655 |
| CHORDC1  | 0.00464452 |
| IFT172   | -0.0046419 |
| TMEM183A | 0.00463881 |
| USP53    | -0.004638  |
| CHST10   | -0.0046377 |
| KHDRBS3  | 0.00463662 |
| AGAP2    | -0.0046357 |
| ACTR1B   | 0.00463394 |
| DMC1     | 0.00463389 |
| ATF5     | 0.0046333  |
| SYCP3    | -0.0046333 |
| CCDC76   | 0.00463249 |
| NDUFAF4  | 0.00462842 |
| ACTN1    | 0.00462802 |
| HPS1     | 0.00462698 |
| RPS6KB2  | 0.00462687 |
| ZC3HAV1  | -0.0046262 |
| IGF2BP3  | 0.00462619 |
| SNRPD1   | 0.00462579 |
| ARFGAP3  | 0.00462293 |
| OBFC1    | 0.00461441 |
| SESN1    | -0.0046135 |
| TMED8    | 0.00461291 |
| GANAB    | 0.00460824 |
| RFXAP    | -0.0046056 |
| PIH1D2   | 0.00460514 |
| RWDD1    | 0.00460376 |
| TNIP1    | -0.0045997 |
| CDK6     | -0.004597  |
| TRAP1    | -0.004597  |
| MKI67IP  | 0.0045955  |
| DUS4L    | 0.00459466 |

|            |            |
|------------|------------|
| NCOA3      | -0.0045932 |
| DBN1       | -0.0045931 |
| LRP10      | -0.004593  |
| ST6GALNAC3 | -0.0045915 |
| KCTD21     | -0.0045905 |
| RABIF      | -0.0045852 |
| DONSON     | 0.00458494 |
| TCEB2      | -0.0045848 |
| KLHDC5     | -0.0045838 |
| LENG9      | -0.0045827 |
| KDM4A      | -0.0045818 |
| SFMBT1     | 0.00458105 |
| RSF1       | -0.0045776 |
| MSN        | 0.00457725 |
| PTCD3      | 0.00457514 |
| RNF168     | -0.0045743 |
| BCORL1     | -0.0045741 |
| RNFT1      | -0.0045734 |
| GPCPD1     | -0.0045725 |
| SPEF1      | -0.004572  |
| RNF215     | -0.0045693 |
| DCUN1D3    | -0.0045676 |
| CYP2U1     | -0.0045657 |
| ERP29      | -0.0045654 |
| TTF2       | 0.00456066 |
| SHISA2     | -0.0045604 |
| R3HCC1     | -0.0045604 |
| TNPO2      | 0.00455918 |
| S1PR5      | 0.00455891 |
| ATP1A1     | 0.00455659 |
| AATF       | 0.00455629 |
| AUP1       | 0.0045557  |
| SAAL1      | 0.0045523  |
| F5         | -0.0045523 |
| LIMK1      | -0.004552  |
| SNX13      | -0.0045507 |
| EML2       | 0.00454859 |
| CHID1      | 0.00454823 |
| PGAM5      | -0.004548  |
| RPL27      | 0.00454243 |
| TRIP12     | -0.0045396 |
| ACTR6      | -0.0045374 |

|         |            |
|---------|------------|
| MOSPD2  | 0.00453694 |
| HEXDC   | 0.00453109 |
| OLFM1   | -0.0045303 |
| ANKRD17 | -0.00453   |
| FANK1   | -0.0045298 |
| VTA1    | 0.00452695 |
| VPS36   | 0.00452695 |
| NOP10   | 0.00452672 |
| DNTTIP2 | 0.00452495 |
| KDM2A   | -0.0045244 |
| IFT52   | -0.004524  |
| SEC61A1 | 0.00452391 |
| FPGT    | 0.00452326 |
| MRPS25  | -0.0045229 |
| JAK1    | -0.0045229 |
| SUDS3   | -0.0045205 |
| ARF4    | -0.0045202 |
| HEXIM1  | -0.0045177 |
| FAM168A | -0.004516  |
| MOB3B   | 0.00451587 |
| MBTPS2  | -0.0045147 |
| FLCN    | 0.00451409 |
| NOC3L   | 0.00451373 |
| DDIT3   | -0.0045132 |
| PDIA4   | 0.0045122  |
| KLF11   | -0.0045119 |
| ACOX3   | -0.0045118 |
| WDR37   | -0.004509  |
| PER2    | 0.00450762 |
| DNAJC10 | 0.00450527 |
| WSB1    | -0.0045046 |
| TUSC3   | -0.0045018 |
| HTATSF1 | -0.0044967 |
| CPSF4   | 0.00449334 |
| OPA3    | -0.0044923 |
| YDJC    | 0.00449222 |
| LRIG2   | -0.0044911 |
| MCFD2   | 0.00448588 |
| SEPHS2  | 0.00448476 |
| THTPA   | -0.0044824 |
| UAP1    | -0.0044809 |
| PRDM2   | -0.0044801 |

|         |            |
|---------|------------|
| PSMD10  | 0.00447978 |
| EIF2AK4 | 0.00447891 |
| ETNK1   | 0.00447867 |
| LIN52   | -0.0044764 |
| LRRC8A  | -0.0044722 |
| MBOAT1  | -0.0044697 |
| TMEM70  | -0.0044681 |
| MKNK1   | 0.0044648  |
| EPN2    | -0.0044631 |
| COL25A1 | -0.0044624 |
| CIRH1A  | 0.00446152 |
| CBX8    | -0.0044599 |
| DSCR3   | 0.00445908 |
| STK38L  | 0.00445809 |
| GNPDA1  | 0.00445509 |
| EMCN    | 0.00444749 |
| ATF7    | -0.00444   |
| ARIH2   | 0.00443766 |
| MEN1    | -0.004434  |
| TBCCD1  | 0.00442749 |
| TRIM33  | -0.0044259 |
| NAP1L4  | 0.0044242  |
| ACVR1B  | -0.004423  |
| LCLAT1  | -0.0044208 |
| HCCS    | 0.00442059 |
| WDTC1   | 0.00441577 |
| ATG9A   | -0.0044147 |
| MYO5A   | -0.004414  |
| MTMR2   | -0.0044102 |
| COPS8   | 0.00440935 |
| PCBD2   | -0.0044071 |
| UNC13D  | 0.00440652 |
| DNAJC21 | -0.0044052 |
| FANCA   | -0.0044045 |
| ITPRIP  | -0.0044008 |
| PDGFRA  | -0.0044003 |
| CRYZ    | 0.0043997  |
| RHOG    | -0.0043968 |
| JMJD6   | 0.00439655 |
| TUBE1   | 0.00439642 |
| LLGL1   | -0.004393  |
| FOXK1   | -0.0043924 |

|           |            |
|-----------|------------|
| RPLP1     | 0.00439208 |
| TDRD7     | -0.0043921 |
| MRPL45    | 0.00438996 |
| ARHGEF2   | -0.0043897 |
| TNPO1     | 0.00438637 |
| PLEKHO1   | -0.0043853 |
| MBD4      | 0.00438443 |
| YES1      | -0.0043823 |
| FBXO33    | -0.0043807 |
| NUB1      | 0.00438051 |
| NEIL3     | 0.00437781 |
| CLNS1A    | -0.0043725 |
| UROD      | -0.0043722 |
| ARRDC1    | -0.0043687 |
| COG5      | -0.0043687 |
| CSTF3     | 0.00436611 |
| SLC24A5   | 0.00436311 |
| BCL7B     | -0.0043614 |
| ORC3      | -0.0043601 |
| ABHD1     | 0.00435929 |
| IGF2BP2   | 0.00435895 |
| FUCA1     | -0.0043565 |
| CDC123    | 0.00435506 |
| E2F2      | 0.00435322 |
| SF3B3     | 0.00435228 |
| NSUN5     | 0.00435161 |
| NDC80     | 0.00435101 |
| APOA1BP   | -0.0043501 |
| LYRM4     | -0.0043501 |
| HCLS1     | -0.0043492 |
| PIP4K2B   | 0.00434828 |
| RASGRP3   | 0.00434818 |
| CSNK1G3   | -0.0043468 |
| DDR2      | -0.0043431 |
| UHRF1BP1L | -0.0043426 |
| ZMIZ2     | -0.0043407 |
| PIGO      | 0.00433932 |
| POLR2M    | -0.0043384 |
| SNX7      | 0.00433766 |
| ITGA9     | 0.00433434 |
| ACSS2     | -0.0043341 |
| NEK7      | 0.00433406 |

|          |            |
|----------|------------|
| ZBTB43   | 0.00433376 |
| BCOR     | -0.0043337 |
| CLPX     | -0.0043307 |
| SRP68    | 0.00432991 |
| KCTD6    | -0.0043289 |
| IQCE     | 0.00432815 |
| ECHDC1   | -0.0043233 |
| STARD4   | 0.00432147 |
| CCNT1    | 0.00431884 |
| DDA1     | 0.00431658 |
| CCDC39   | -0.0043117 |
| HEXA     | 0.00430755 |
| PRPF40A  | -0.0043071 |
| GEMIN4   | 0.00430543 |
| FREM1    | 0.00429777 |
| CTNNB1   | -0.0042966 |
| FYB      | -0.0042956 |
| SLC25A30 | 0.00429452 |
| UBE2D2   | -0.0042868 |
| FAM169A  | -0.0042856 |
| QDPR     | -0.0042827 |
| HS1BP3   | 0.00428262 |
| PFKFB3   | 0.00428111 |
| GNPAT    | 0.00428025 |
| AIFM2    | 0.00427974 |
| FKRP     | -0.0042734 |
| UGCG     | -0.0042727 |
| EPC1     | -0.004272  |
| NUCB1    | -0.0042672 |
| JHDM1D   | -0.004265  |
| WDR17    | -0.0042627 |
| FKBP8    | 0.00426237 |
| TBC1D7   | -0.0042611 |
| MTHFD2L  | -0.0042601 |
| NCL      | 0.00425935 |
| RPL13A   | -0.0042576 |
| ASAP2    | -0.0042558 |
| EME1     | 0.00425135 |
| DHX57    | -0.0042506 |
| SPG21    | -0.0042441 |
| CHST14   | -0.0042417 |
| XRN1     | -0.0042404 |

|          |            |
|----------|------------|
| SEC16A   | -0.0042404 |
| PRRC1    | -0.0042365 |
| TUBA4A   | -0.0042365 |
| RASGEF1B | 0.0042345  |
| MLLT10   | -0.0042339 |
| FBXL14   | -0.0042332 |
| ADAL     | -0.0042316 |
| DCTN4    | -0.0042313 |
| GALNT1   | 0.00422782 |
| GPR125   | -0.0042276 |
| SATB2    | 0.00422308 |
| ATP5J    | -0.0042198 |
| CYR61    | -0.004219  |
| ARAF     | -0.0042185 |
| KARS     | 0.00421758 |
| GMCL1    | -0.0042168 |
| HOXA7    | 0.00421543 |
| FNDC3B   | -0.004214  |
| PPP2R5C  | -0.004214  |
| DHX9     | -0.0042132 |
| SHOC2    | -0.004212  |
| BBS7     | -0.0042087 |
| RAB8A    | 0.00420649 |
| NOB1     | -0.0042054 |
| D2HGDH   | -0.0042053 |
| TMEM59   | -0.0042029 |
| BRD3     | -0.0042022 |
| ZDHHC6   | 0.00420051 |
| BCAP29   | -0.0042002 |
| MSX2     | -0.0042    |
| SLC37A2  | 0.00419858 |
| JOSD2    | 0.00419818 |
| LCMT2    | -0.004196  |
| GPR161   | 0.00419551 |
| TLK1     | -0.0041925 |
| PTGS1    | -0.0041907 |
| UPRT     | 0.00419045 |
| RG9MTD3  | 0.00419038 |
| GCFC1    | -0.0041855 |
| DSN1     | 0.00418543 |
| TAF2     | 0.00418214 |
| SNX3     | -0.0041816 |



|          |            |
|----------|------------|
| RBM22    | 0.00417818 |
| FAIM     | -0.0041765 |
| DBNDD1   | -0.0041723 |
| SENP2    | 0.00417137 |
| MRPS18C  | -0.0041707 |
| STK38    | -0.0041705 |
| CSRNP1   | 0.00416847 |
| KPNB1    | 0.00416545 |
| UBAP1    | -0.0041647 |
| ZDHHC3   | 0.00415979 |
| GNA13    | 0.00415718 |
| DCP2     | 0.00415638 |
| ZC3H12A  | -0.0041543 |
| CNIH     | 0.00415403 |
| BRE      | -0.0041517 |
| SHROOM4  | -0.0041502 |
| RAB12    | -0.0041496 |
| RBMS1    | -0.0041486 |
| SLC9A3R1 | 0.00414402 |
| WDYHV1   | -0.0041377 |
| CEPT1    | -0.0041334 |
| EIF4E    | 0.00413099 |
| C1QBP    | 0.00413046 |
| POLR2K   | -0.0041285 |
| BAG5     | 0.00412766 |
| NDUFS3   | -0.004126  |
| SLC48A1  | -0.0041239 |
| CDCA7L   | 0.00412279 |
| CNOT4    | -0.0041224 |
| RPS18    | -0.0041222 |
| PRDX1    | 0.004121   |
| GRB10    | -0.0041193 |
| TMEM39A  | -0.0041188 |
| NR1D2    | 0.00411762 |
| HOGA1    | -0.0041165 |
| CWC27    | 0.00411534 |
| GALC     | -0.0041131 |
| TCF19    | -0.0041087 |
| EFNA2    | 0.0041075  |
| NRAS     | -0.0041064 |
| MPP5     | -0.0041053 |
| SCAMP2   | -0.0041053 |

|          |            |
|----------|------------|
| ENTPD4   | -0.0041049 |
| USH1C    | 0.00410258 |
| TUB      | -0.0041017 |
| BRAF     | -0.0040987 |
| POLE2    | 0.00409806 |
| LSM1     | -0.0040956 |
| SAP30BP  | 0.00409365 |
| MYBL1    | -0.0040935 |
| CAB39    | -0.0040872 |
| PROM1    | -0.0040863 |
| DNAJC3   | 0.00408417 |
| TMX1     | -0.0040824 |
| RAB21    | -0.0040812 |
| PI4K2B   | 0.00407867 |
| ABCB10   | 0.00407663 |
| XRCC6    | 0.00407633 |
| GTF2I    | -0.0040748 |
| MRPS36   | 0.00407215 |
| GLTPD1   | 0.00407148 |
| ILVBL    | -0.0040699 |
| BRSK1    | 0.00406831 |
| LEF1     | 0.00406541 |
| ATP5D    | -0.0040653 |
| ATG4B    | 0.004063   |
| TMEM43   | 0.00405945 |
| YIPF2    | -0.0040574 |
| ARHGAP42 | -0.0040542 |
| SNRPE    | 0.00405365 |
| CAV1     | -0.0040532 |
| WHAMM    | -0.0040525 |
| BSN      | -0.0040514 |
| RAF1     | 0.00405122 |
| ABCE1    | 0.00404822 |
| CDAN1    | 0.00403673 |
| WDR89    | 0.0040367  |
| LMBR1    | 0.00403519 |
| PGAM2    | 0.00403454 |
| ADAT3    | 0.00403415 |
| MRPS15   | 0.00403402 |
| CARNS1   | -0.0040318 |
| CADM1    | -0.0040315 |
| TUBD1    | 0.00403105 |

|          |            |
|----------|------------|
| NDUFV2   | -0.0040276 |
| COMMD6   | 0.00402717 |
| LARS2    | -0.004022  |
| FRS3     | -0.0040219 |
| RBBP8    | -0.0040218 |
| SCPEP1   | -0.0040214 |
| GATM     | -0.0040207 |
| SEC11C   | 0.00401966 |
| AP2A1    | 0.00401738 |
| AZI2     | -0.0040163 |
| LLPH     | 0.00401551 |
| TSPAN4   | -0.004014  |
| LBH      | -0.0040112 |
| NFXL1    | -0.00401   |
| LAMA1    | 0.0040073  |
| PPM1A    | -0.004007  |
| KIF14    | 0.00400398 |
| HPS5     | -0.0040023 |
| RCN2     | -0.0040011 |
| STXBP5   | -0.0040011 |
| KIF18A   | 0.00399918 |
| ARRDC4   | 0.00399802 |
| RAI1     | -0.0039978 |
| TARBP2   | 0.00399665 |
| IRF2     | -0.0039948 |
| ANAPC10  | -0.0039899 |
| GDAP2    | 0.00398859 |
| ADAMTS20 | -0.0039771 |
| LRRC48   | -0.0039761 |
| MEF2A    | -0.0039752 |
| ATF6B    | 0.0039747  |
| MED17    | 0.00397242 |
| RPL35A   | 0.00397132 |
| SART3    | -0.0039674 |
| CDK20    | 0.00396632 |
| SLC35B1  | 0.00396491 |
| SERPINF1 | -0.0039646 |
| FASTKD3  | 0.0039636  |
| CMYA5    | -0.0039606 |
| SERTAD4  | 0.00396023 |
| TAOK2    | -0.0039601 |
| OSGIN2   | 0.00395795 |

|         |            |
|---------|------------|
| ETS1    | -0.0039572 |
| AP1AR   | -0.0039557 |
| PSMC2   | 0.00395529 |
| ACPL2   | -0.0039507 |
| KCTD18  | 0.00395007 |
| CBL     | -0.0039498 |
| CASKIN2 | -0.0039465 |
| FGD6    | -0.0039453 |
| FAM192A | -0.0039437 |
| ZFAND3  | -0.0039419 |
| MINPP1  | 0.00394045 |
| MFN1    | -0.0039345 |
| EFNA5   | -0.0039283 |
| SHMT2   | 0.0039261  |
| SARNP   | -0.0039239 |
| PCID2   | 0.00392288 |
| CLCN1   | -0.0039218 |
| ESM1    | 0.00392168 |
| GALNT10 | 0.00392097 |
| MLLT4   | -0.0039193 |
| FAM135A | -0.0039146 |
| CASP6   | 0.00391249 |
| RAVER1  | 0.0039124  |
| MRPS18A | 0.00391182 |
| ATP9B   | -0.0039115 |
| MKI67   | -0.0039109 |
| ANXA3   | 0.00391047 |
| RIC8B   | 0.00390897 |
| WIBG    | 0.00390881 |
| MRPL4   | 0.00390577 |
| PTPN21  | -0.0039051 |
| ARHGAP9 | 0.00390365 |
| TOR3A   | -0.0039033 |
| NOL9    | 0.00390253 |
| IL16    | 0.00390151 |
| NUP210  | -0.0039004 |
| PRPF18  | 0.00389704 |
| FAM149A | -0.0038945 |
| SLC2A4  | -0.0038928 |
| DECR2   | -0.0038923 |
| CXCR7   | -0.0038906 |
| VGLL4   | -0.0038856 |

|          |            |
|----------|------------|
| RPUSD4   | 0.00388551 |
| ZDBF2    | -0.0038854 |
| PLAG1    | -0.0038854 |
| DERA     | 0.00388515 |
| PEPD     | -0.0038817 |
| TRIP4    | 0.00388133 |
| UNC119B  | 0.00388078 |
| FKBPL    | 0.00387732 |
| IQCD     | 0.00387726 |
| CBFA2T3  | 0.00387509 |
| DNAJC5   | -0.0038709 |
| GOSR1    | -0.0038703 |
| FAM114A2 | -0.0038703 |
| RAPGEF4  | 0.00386589 |
| PPFIA4   | 0.00386399 |
| PPCDC    | -0.0038626 |
| CABLES1  | -0.0038625 |
| FAM193B  | -0.0038625 |
| PRPF4B   | -0.0038597 |
| TOP1MT   | 0.00385845 |
| RSPO1    | 0.00385672 |
| PDGFB    | -0.0038566 |
| NFE2L2   | -0.0038564 |
| RAP2A    | 0.00385354 |
| EPDR1    | -0.0038533 |
| CWF19L1  | -0.0038532 |
| CCDC75   | -0.0038497 |
| MYO18A   | -0.0038484 |
| PSMD2    | 0.00384809 |
| OSGEP    | 0.00384726 |
| GYPC     | -0.003846  |
| MTERFD3  | -0.0038445 |
| FNIP2    | -0.0038441 |
| TOB1     | -0.0038439 |
| GNB1     | -0.0038425 |
| PAICS    | 0.00384158 |
| PRELID1  | 0.00384018 |
| NFKB2    | -0.0038402 |
| QTRT1    | 0.00383999 |
| KDM1A    | -0.0038351 |
| FAM120C  | -0.0038344 |
| MAN2C1   | -0.0038335 |

|          |            |
|----------|------------|
| NMT1     | 0.00383302 |
| ADCY7    | 0.0038309  |
| AMFR     | 0.0038284  |
| PHYHIP   | 0.00382747 |
| CHAF1A   | 0.00382531 |
| FAM175B  | 0.00382435 |
| TECR     | 0.00382349 |
| POLR3B   | 0.00382325 |
| PPP1R15B | 0.00381984 |
| NOVA2    | -0.0038177 |
| DBT      | 0.00381305 |
| ZPBP     | 0.00381241 |
| XPO6     | -0.0038106 |
| LSM6     | 0.00380987 |
| METTL6   | 0.003809   |
| PHF17    | 0.00380044 |
| SLC25A13 | 0.00379789 |
| RAPGEF1  | -0.0037937 |
| ZCCHC17  | -0.0037912 |
| RAB3GAP2 | -0.0037852 |
| GSR      | -0.0037831 |
| NDUFA7   | -0.0037783 |
| ZCCHC14  | -0.0037767 |
| SLC39A9  | 0.00377402 |
| COPZ1    | 0.00377401 |
| WDFY2    | -0.0037722 |
| PBX2     | -0.0037696 |
| TCTN3    | -0.0037695 |
| KAT2A    | 0.00376915 |
| YWHAB    | 0.00376841 |
| PRPF3    | 0.00376581 |
| TRMT61B  | -0.0037631 |
| PPP3CB   | 0.0037625  |
| TFCP2L1  | -0.0037607 |
| PSMB4    | 0.0037583  |
| NFKBIB   | 0.0037582  |
| MFAP3    | -0.0037564 |
| TRPC4AP  | 0.0037563  |
| RAD54L2  | -0.0037559 |
| EXOSC9   | -0.0037549 |
| AGFG1    | -0.0037532 |
| SURF1    | 0.00375169 |

|          |            |
|----------|------------|
| LMLN     | 0.00375095 |
| PTPRC    | 0.00374977 |
| NANS     | 0.00374725 |
| GALK2    | 0.00374607 |
| ATHL1    | 0.00374327 |
| HNRNPH3  | 0.00374255 |
| HGSNAT   | -0.0037394 |
| GIGYF1   | -0.0037374 |
| RALGAPB  | -0.0037373 |
| TMF1     | -0.0037367 |
| DDB2     | -0.0037307 |
| PPP4R4   | -0.0037299 |
| EIF1B    | -0.0037262 |
| WIPI2    | -0.003726  |
| FBXL6    | 0.00372479 |
| TTC16    | -0.0037245 |
| SLC37A3  | -0.0037233 |
| AAGAB    | 0.00372297 |
| TOMM7    | -0.0037155 |
| INTU     | 0.00371476 |
| DMXL2    | -0.0037125 |
| KTN1     | -0.003708  |
| GPRC5B   | -0.0037074 |
| TUBGCP2  | -0.0037071 |
| RHOBTB1  | -0.0037066 |
| TMC6     | 0.00370378 |
| RPL32    | 0.00370272 |
| CACHD1   | -0.0037011 |
| LETM2    | -0.0036998 |
| EMD      | -0.003698  |
| ENOPH1   | 0.00369254 |
| PXDN     | -0.0036919 |
| CSE1L    | 0.00369099 |
| FGFR1OP2 | -0.0036875 |
| DNAJC13  | 0.00368709 |
| CNOT3    | -0.0036863 |
| LRRC24   | -0.0036827 |
| GTPBP8   | 0.00368126 |
| CAPRIN2  | 0.00368064 |
| UBE2B    | -0.0036806 |
| SFXN4    | -0.0036777 |
| KCNAB2   | -0.0036771 |

|          |            |
|----------|------------|
| IRF3     | 0.00367655 |
| DYNLL1   | -0.0036765 |
| PMS2     | -0.0036747 |
| PAQR3    | 0.00367299 |
| SKIV2L2  | -0.0036726 |
| ARID2    | -0.0036725 |
| METTLL14 | -0.0036718 |
| CLN8     | -0.0036701 |
| WRNIP1   | 0.00366558 |
| DGKG     | -0.0036649 |
| TMEM132A | -0.0036645 |
| GALNT5   | -0.0036635 |
| PDLIM5   | -0.0036594 |
| SYT14    | -0.0036532 |
| MIOS     | 0.00365297 |
| RQCD1    | 0.00364529 |
| SNUPN    | -0.0036436 |
| ELF2     | -0.0036408 |
| PSME4    | -0.0036407 |
| SP1      | -0.0036396 |
| MFN2     | -0.0036381 |
| RNF6     | 0.00363023 |
| DHX8     | 0.00362788 |
| BAK1     | 0.00362526 |
| GALNTL4  | 0.00362468 |
| SLAIN2   | -0.0036237 |
| RIN3     | -0.0036229 |
| CHIC1    | -0.0036156 |
| EYA3     | 0.00361279 |
| SYAP1    | -0.0036117 |
| NPLOC4   | 0.00361067 |
| ERGIC1   | 0.00360623 |
| CCDC23   | -0.0036057 |
| DHX35    | 0.00360545 |
| WDR19    | -0.0036017 |
| SAV1     | -0.0035978 |
| PGM2     | 0.00359663 |
| CRAT     | -0.0035958 |
| INO80B   | -0.0035893 |
| OPA1     | -0.0035881 |
| KLHDC10  | 0.00358725 |
| SPATS2   | 0.0035838  |



|          |            |
|----------|------------|
| PSMB7    | 0.00358342 |
| MYO10    | -0.0035831 |
| LRP3     | -0.0035756 |
| SMAD5    | -0.0035743 |
| MRPL21   | 0.00357263 |
| NICN1    | -0.0035703 |
| GTF2IRD1 | -0.0035701 |
| SUMF1    | -0.003569  |
| SEMA4D   | -0.0035657 |
| JAKMIP2  | 0.00356442 |
| NDUFAF3  | -0.0035643 |
| SUPT7L   | -0.0035635 |
| NPRL3    | -0.0035627 |
| TROVE2   | -0.0035624 |
| CMTM6    | 0.00355921 |
| CTDP1    | 0.003559   |
| PTP4A1   | 0.00355677 |
| OSTF1    | -0.0035566 |
| TNKS1BP1 | -0.0035555 |
| NDE1     | -0.0035548 |
| ERGIC2   | -0.0035542 |
| DISP1    | 0.00355381 |
| GBF1     | -0.0035522 |
| TMEM199  | -0.0035515 |
| DNAJB11  | 0.00354805 |
| FGF9     | -0.003548  |
| STK11IP  | 0.00354673 |
| RMND5A   | -0.0035463 |
| RASSF1   | -0.0035424 |
| SH2B2    | 0.00354048 |
| PLCB1    | 0.00353898 |
| UVRAG    | -0.0035378 |
| DEDD     | -0.0035362 |
| LRRC45   | -0.0035333 |
| SLA2     | -0.0035332 |
| ADAM10   | -0.0035298 |
| EDA2R    | -0.0035289 |
| CNOT8    | 0.00352793 |
| SART1    | 0.00352764 |
| BCAR3    | 0.0035262  |
| ETS2     | 0.00352542 |
| PRPSAP2  | -0.0035245 |

|          |            |
|----------|------------|
| IVD      | 0.00352159 |
| PROX2    | 0.00352115 |
| FMNL3    | -0.0035203 |
| PIP4K2A  | -0.0035186 |
| ZCRB1    | -0.0035166 |
| KIT      | -0.0035164 |
| ABCF3    | 0.00351526 |
| CUL4A    | -0.0035151 |
| RASSF5   | 0.00351469 |
| FBXO10   | 0.00351319 |
| CCDC104  | -0.0035124 |
| PIGT     | -0.0035124 |
| CAMSAP1  | -0.0035116 |
| UQCRFS1  | -0.0035112 |
| USP42    | -0.0035081 |
| VBP1     | 0.00350693 |
| HEATR5A  | -0.0035058 |
| NGLY1    | -0.0035044 |
| MRPL27   | 0.003504   |
| MYEOV2   | -0.0035022 |
| CLCC1    | -0.003502  |
| FANCD2   | 0.00350163 |
| MAP3K3   | 0.00350121 |
| NCOA7    | -0.0035009 |
| ZNRD1    | 0.00350034 |
| MTOR     | -0.0034974 |
| SCARF1   | -0.0034955 |
| LMF1     | -0.0034944 |
| DLG3     | -0.0034905 |
| NUDT21   | -0.00349   |
| SPTY2D1  | -0.0034865 |
| SLMO2    | 0.00348364 |
| BLOC1S2  | 0.00348258 |
| MRI1     | -0.0034825 |
| EPN3     | -0.0034806 |
| STK10    | -0.0034758 |
| NUP153   | 0.00347501 |
| TTLL1    | 0.00347454 |
| TSPAN12  | -0.0034745 |
| PCSK7    | -0.0034729 |
| MAPKAPK5 | -0.0034712 |
| KDSR     | -0.003469  |

|          |            |
|----------|------------|
| RBPJ     | -0.0034678 |
| EIF4H    | -0.0034645 |
| RHOBTB2  | -0.0034607 |
| COL15A1  | -0.0034589 |
| RPS8     | 0.00345818 |
| RTKN2    | 0.00345363 |
| BHLHE40  | 0.00345158 |
| SOCS3    | -0.0034515 |
| AMPH     | -0.0034514 |
| TYW3     | -0.0034469 |
| DYM      | -0.0034465 |
| LXN      | -0.0034445 |
| TTC38    | -0.0034435 |
| ASB8     | -0.0034428 |
| SLC23A2  | 0.00344124 |
| MFSD1    | 0.00343916 |
| MAST2    | -0.0034384 |
| RAB3IL1  | -0.0034381 |
| RINT1    | -0.0034351 |
| ZBTB49   | 0.00343474 |
| SETDB1   | -0.0034329 |
| CHMP7    | -0.0034287 |
| SERINC3  | -0.0034268 |
| GLB1L    | -0.0034242 |
| DCUN1D1  | -0.0034236 |
| KLHL12   | 0.00341566 |
| SEC13    | 0.00341237 |
| DLX2     | 0.0034123  |
| KBTBD8   | -0.0034115 |
| GRSF1    | -0.0034105 |
| ARHGEF10 | -0.0034082 |
| FGFR4    | 0.00340779 |
| PCCA     | 0.00340644 |
| POC1B    | 0.00340524 |
| TSR2     | 0.00340205 |
| RNF19A   | -0.003402  |
| CDC42BPB | -0.0033999 |
| AMOTL2   | -0.0033982 |
| PNPLA2   | 0.00339661 |
| TRAF2    | -0.0033963 |
| DCUN1D4  | -0.0033944 |
| HTR2B    | -0.0033923 |

|          |            |
|----------|------------|
| ZFYVE16  | -0.0033907 |
| ARHGDI1A | 0.00338969 |
| ARHGGEF4 | -0.0033862 |
| SLC44A2  | -0.003385  |
| PCSK4    | -0.003383  |
| HIVEP3   | -0.003381  |
| MAP3K1   | -0.0033796 |
| PIM3     | 0.00337467 |
| HNRNPA3  | -0.0033736 |
| CYTH1    | -0.0033732 |
| RIPK1    | 0.00336532 |
| CHAC2    | -0.0033628 |
| CUL5     | 0.00336135 |
| MRPL36   | 0.00336033 |
| CCDC111  | -0.0033584 |
| SLC25A36 | -0.003358  |
| LARP1    | 0.00335596 |
| GLYR1    | 0.00335459 |
| NCAPD3   | 0.00335207 |
| CROT     | 0.00334972 |
| BEST1    | -0.003349  |
| DAD1     | 0.00334868 |
| RBM26    | -0.0033461 |
| ACAA2    | 0.0033448  |
| CALR3    | -0.0033444 |
| PTPN13   | -0.0033388 |
| MPP7     | -0.0033379 |
| EXT1     | -0.0033373 |
| CD37     | 0.00333657 |
| SCAF4    | -0.0033358 |
| CEP164   | -0.0033325 |
| NISCH    | -0.0033301 |
| ANKS3    | -0.0033293 |
| SERINC5  | -0.0033277 |
| ECI1     | -0.0033273 |
| TNFRSF21 | 0.00332639 |
| SAP30L   | 0.00332619 |
| SLC27A1  | 0.00332515 |
| HDAC2    | -0.0033239 |
| UGGT1    | 0.00332325 |
| FAM40A   | 0.00332255 |
| INPP4A   | -0.003321  |

|          |            |
|----------|------------|
| WDR85    | -0.0033199 |
| SLC7A1   | 0.00331886 |
| SNRNP70  | -0.003314  |
| PCK2     | -0.0033136 |
| FAM114A1 | -0.0033132 |
| MZT1     | -0.0033108 |
| CGNL1    | 0.00331046 |
| SPRY2    | 0.00330352 |
| AGFG2    | 0.00330285 |
| UNC5A    | -0.003302  |
| MSL3     | -0.0033001 |
| GNL1     | -0.0032991 |
| CAMSAP2  | -0.0032956 |
| RPL4     | -0.0032952 |
| CNTN2    | 0.00329367 |
| FBXO34   | -0.0032925 |
| LAPTM4B  | 0.00329172 |
| FAM131B  | -0.003288  |
| ACOT11   | 0.00328709 |
| WDR13    | -0.003287  |
| CEP97    | 0.00328476 |
| CMTM4    | -0.0032823 |
| NFRKB    | -0.0032789 |
| CLCN3    | 0.00327623 |
| LZTS2    | -0.0032755 |
| RNPEP    | 0.00327254 |
| TBC1D22B | -0.0032713 |
| SGPP2    | -0.0032686 |
| SETD4    | -0.0032607 |
| PELI2    | -0.0032555 |
| PPFIA1   | -0.0032516 |
| ST3GAL3  | -0.0032459 |
| RBM6     | -0.003244  |
| TMEM33   | 0.00324136 |
| NAA16    | 0.00323166 |
| RANGAP1  | 0.00323061 |
| ASB7     | -0.0032289 |
| GNPNAT1  | 0.00322779 |
| HMBS     | 0.00322589 |
| UEVLD    | 0.00322352 |
| CCDC157  | -0.003223  |
| MUL1     | 0.00322292 |

|          |            |
|----------|------------|
| KDM4B    | 0.00322281 |
| SHROOM2  | -0.0032226 |
| SOLH     | 0.00322034 |
| AP1B1    | -0.0032199 |
| TSC1     | -0.0032198 |
| IPO8     | 0.00321817 |
| RAB18    | -0.0032168 |
| WASF2    | -0.0032168 |
| RRAGD    | -0.0032141 |
| OXNAD1   | 0.00321153 |
| RPS26    | 0.00320894 |
| H2AFY2   | -0.0032085 |
| DUSP3    | 0.00320448 |
| PEF1     | -0.0031961 |
| OLA1     | -0.0031946 |
| SIGMAR1  | 0.00319444 |
| RIF1     | -0.0031941 |
| PUS10    | 0.00319361 |
| UPF2     | -0.003191  |
| BTF3     | 0.00319095 |
| ANO6     | -0.0031906 |
| PCF11    | -0.0031904 |
| UBTF     | 0.00318991 |
| STK16    | 0.00318947 |
| TMEM11   | 0.00318915 |
| TIE1     | 0.0031861  |
| ESCO1    | -0.003186  |
| TBC1D10B | -0.0031803 |
| MRPL22   | 0.00317922 |
| GORASP1  | 0.00317734 |
| PEX7     | -0.0031738 |
| FDXR     | 0.00317132 |
| ZDHC5    | -0.0031709 |
| MEMO1    | -0.0031694 |
| TUBGCP4  | -0.0031682 |
| RG9MTD1  | 0.00316647 |
| ZMYND8   | -0.0031658 |
| AMPD2    | 0.00316308 |
| TMEM98   | -0.0031601 |
| DENND4B  | -0.0031543 |
| YIPF3    | -0.0031532 |
| ARFGAP1  | -0.0031522 |

|           |            |
|-----------|------------|
| PM20D2    | -0.00315   |
| THOC5     | 0.00315002 |
| QPCTL     | 0.00314973 |
| SAR1B     | -0.0031496 |
| ACBD3     | -0.0031487 |
| LANCL1    | -0.0031476 |
| PLAU      | -0.0031475 |
| TLN2      | 0.00314655 |
| ELL       | -0.003143  |
| CCT7      | 0.00313953 |
| CORO2A    | -0.0031383 |
| PDZK1     | -0.0031378 |
| GIGYF2    | -0.0031375 |
| EIF4E2    | 0.00313525 |
| TSEN34    | 0.00313192 |
| SLC39A10  | -0.0031309 |
| EPRS      | 0.00312883 |
| NCOA4     | 0.00312749 |
| UBAC2     | 0.00312001 |
| ELMO1     | -0.0031185 |
| NPAT      | -0.0031168 |
| STK3      | -0.0031166 |
| ROMO1     | -0.0031162 |
| MAP2K3    | 0.00311446 |
| CCDC71    | 0.00311303 |
| EXT2      | 0.00310857 |
| CEP250    | 0.00310717 |
| SMUG1     | 0.00310367 |
| RCN3      | -0.0031027 |
| RNF138    | 0.00310243 |
| DNAJB9    | -0.0031024 |
| TGS1      | -0.0030997 |
| TCEANC    | -0.003096  |
| ANAPC16   | -0.0030954 |
| POLDIP3   | 0.00309471 |
| TPMT      | 0.00309426 |
| C1GALT1C1 | -0.0030912 |
| SLCO2B1   | -0.00309   |
| ECM1      | 0.00308957 |
| APIP      | 0.00308859 |
| RPAP2     | 0.00308741 |
| TIPIN     | 0.00308717 |

|          |            |
|----------|------------|
| ARHGAP31 | -0.0030866 |
| RPP14    | -0.0030814 |
| L2HGDH   | 0.00307777 |
| RBM19    | 0.00307768 |
| TLN1     | -0.003077  |
| ARL8B    | -0.0030753 |
| PUM2     | -0.0030752 |
| STAM     | -0.0030743 |
| RAD54B   | -0.0030735 |
| DNLZ     | 0.00307005 |
| GFM2     | 0.00306883 |
| MLX      | 0.00306627 |
| CPSF3L   | 0.00306459 |
| NUFIP1   | 0.00306281 |
| DISC1    | -0.0030609 |
| TBL1XR1  | 0.00305711 |
| RBM15B   | -0.0030554 |
| MRPS31   | 0.0030549  |
| GOLGA4   | -0.0030535 |
| VAMP8    | -0.0030533 |
| ATG2A    | -0.0030527 |
| EDF1     | -0.0030515 |
| FIP1L1   | -0.0030513 |
| IK       | -0.0030485 |
| KCTD15   | 0.0030469  |
| GRPEL1   | 0.00304524 |
| ARMC7    | 0.00304473 |
| DNM2     | -0.0030441 |
| MRPL39   | -0.0030439 |
| CXCL12   | -0.0030409 |
| PICK1    | -0.0030407 |
| CCDC90A  | -0.0030389 |
| NUP133   | 0.00303749 |
| NDUFA6   | -0.0030324 |
| ERAL1    | 0.00303187 |
| UBP1     | -0.0030288 |
| TBK1     | -0.0030271 |
| GCA      | -0.0030271 |
| JUND     | -0.0030249 |
| ZWILCH   | 0.0030234  |
| EIF4EBP2 | 0.00301893 |
| TANC1    | 0.00301774 |



|          |            |
|----------|------------|
| MAP2K1   | 0.00301674 |
| NSMCE1   | -0.0030151 |
| MDH1     | 0.00301439 |
| TERF2    | -0.0030133 |
| RNF216   | -0.0030117 |
| VWA2     | 0.00301082 |
| TCTN1    | -0.0030107 |
| PHTF2    | 0.00301068 |
| COL18A1  | -0.0030097 |
| HMGXB4   | -0.0030063 |
| PTPRJ    | 0.00300241 |
| HNRNPL   | -0.0030013 |
| COPS6    | -0.0029973 |
| PPP2R3C  | 0.00299696 |
| STOX2    | -0.0029958 |
| ADAMTS10 | -0.0029956 |
| ORC4     | -0.0029943 |
| NARS2    | 0.0029887  |
| METAP1   | 0.00298732 |
| PAFAH2   | 0.00298389 |
| RDBP     | 0.00298015 |
| MRPL50   | -0.0029769 |
| BRF2     | -0.002976  |
| DDX52    | 0.00297346 |
| VWA5B2   | -0.0029717 |
| RALY     | -0.0029664 |
| NDUFB5   | -0.0029661 |
| SEH1L    | 0.0029658  |
| POLR3F   | 0.00296468 |
| COG4     | -0.0029626 |
| DIMT1    | 0.00296246 |
| SLC16A10 | -0.0029554 |
| COMMD10  | -0.0029543 |
| HIBADH   | -0.0029539 |
| GIN51    | 0.0029537  |
| CCHCR1   | 0.00295321 |
| MAN2A1   | -0.0029507 |
| LGALS8   | -0.0029451 |
| SMAP2    | -0.0029401 |
| TTL      | 0.00293929 |
| GTF2A2   | -0.0029392 |
| ALAD     | -0.0029381 |

|         |            |
|---------|------------|
| GCC1    | -0.0029377 |
| CETN3   | -0.0029376 |
| NUPL1   | 0.00293683 |
| FLT4    | 0.00293322 |
| LMAN2   | -0.00293   |
| MYO1F   | -0.0029283 |
| RC3H1   | -0.0029282 |
| GALNS   | -0.0029256 |
| PTPMT1  | -0.0029244 |
| APAF1   | -0.0029228 |
| DSE     | 0.00292243 |
| EIF2B5  | 0.00292192 |
| ELK1    | -0.0029204 |
| ATG13   | -0.0029171 |
| RNF157  | -0.002916  |
| BROX    | 0.00291066 |
| SMARCD1 | 0.00291018 |
| ARHGDIB | -0.0029058 |
| PCNA    | 0.00290512 |
| RPS6KA3 | 0.00290428 |
| RALA    | -0.0029034 |
| ZBTB37  | 0.00290091 |
| MIPOL1  | 0.00289947 |
| SIK3    | -0.0028992 |
| TBC1D19 | -0.0028985 |
| BAG4    | -0.0028949 |
| PHF21B  | 0.00289251 |
| PANK3   | -0.002889  |
| SFR1    | 0.00288421 |
| SIPA1   | 0.0028822  |
| BBS4    | -0.0028821 |
| TRAK1   | -0.0028768 |
| HEATR6  | -0.0028756 |
| APLF    | 0.00287391 |
| ZFYVE20 | 0.00287153 |
| TBRG1   | 0.00287035 |
| CRY2    | -0.0028702 |
| UBR5    | -0.0028674 |
| KLHL8   | -0.0028669 |
| ABLIM1  | 0.00286585 |
| CUL4B   | 0.00286495 |
| BNIP2   | -0.0028646 |

|          |            |
|----------|------------|
| RNASEH2A | -0.0028625 |
| ANGEL2   | -0.0028616 |
| PACSIN3  | -0.002857  |
| PIKFYVE  | -0.0028546 |
| CTIF     | -0.0028546 |
| CCDC65   | -0.0028544 |
| TULP2    | 0.00285385 |
| EDEM3    | -0.0028534 |
| WDR73    | 0.00285182 |
| ZC3H13   | -0.0028517 |
| SF3A1    | -0.0028513 |
| TRRAP    | -0.002851  |
| MED7     | -0.0028508 |
| CALM1    | -0.0028486 |
| RASSF9   | 0.00284629 |
| RNF8     | 0.00284506 |
| YWHAZ    | 0.0028444  |
| EFCAB4B  | 0.0028437  |
| CPNE2    | 0.00284192 |
| PEAR1    | 0.00284088 |
| PHLPP1   | -0.0028395 |
| BET1L    | -0.0028362 |
| MED29    | -0.0028361 |
| SESN2    | 0.00283577 |
| NAGLU    | -0.0028339 |
| RBM27    | -0.0028325 |
| LPAR4    | 0.00282862 |
| PAQR4    | 0.00282682 |
| KDELC1   | 0.0028268  |
| DYNC1I2  | -0.0028254 |
| ACP1     | 0.00282474 |
| OAT      | 0.00282266 |
| LRCH4    | 0.00282251 |
| YTHDC2   | -0.0028207 |
| GPBP1L1  | 0.00282011 |
| TAZ      | 0.00281952 |
| CCDC59   | -0.0028193 |
| LRRC39   | 0.00281878 |
| SRSF11   | -0.0028185 |
| DAP      | -0.0028113 |
| ZBTB48   | 0.00281072 |
| SLC25A17 | -0.0028103 |

|          |            |
|----------|------------|
| FAM169B  | -0.0028102 |
| STRAP    | 0.00280951 |
| LIPT1    | -0.0028089 |
| ARPC4    | 0.00280433 |
| WDR82    | 0.00280026 |
| FERMT3   | -0.0027993 |
| N4BP1    | -0.0027993 |
| G6PC3    | 0.00279835 |
| VPS37C   | 0.00279617 |
| LPIN3    | -0.0027937 |
| LRR1     | -0.0027931 |
| PSME2    | 0.00278824 |
| METTLL17 | -0.0027874 |
| FXR1     | 0.00278708 |
| GAK      | -0.0027829 |
| ERN1     | -0.0027794 |
| PIGA     | 0.00277716 |
| PINX1    | 0.00277534 |
| SLC25A32 | 0.0027736  |
| CKAP2    | 0.00277351 |
| NAA20    | 0.00277239 |
| SLC31A1  | -0.002771  |
| PRKRIR   | -0.0027708 |
| SYNCRIP  | 0.00276897 |
| UFM1     | 0.00276857 |
| TBC1D5   | -0.0027681 |
| HSPA13   | -0.0027664 |
| TCEA1    | 0.00276362 |
| INPPL1   | -0.0027621 |
| FOXK2    | 0.00276149 |
| RBM33    | -0.0027613 |
| ARL13B   | 0.00275876 |
| FAF2     | -0.0027572 |
| SLC33A1  | 0.00275437 |
| RNF25    | 0.00275291 |
| WDPCP    | 0.00275177 |
| LARP1B   | 0.0027481  |
| YME1L1   | -0.002748  |
| ATP1B3   | 0.0027477  |
| FZD7     | -0.0027441 |
| PIGC     | -0.0027425 |
| SCUBE3   | -0.0027407 |

|          |            |
|----------|------------|
| SIRT3    | -0.0027384 |
| VDAC3    | -0.0027379 |
| RWDD2A   | 0.00273774 |
| MSI2     | -0.002737  |
| FARP1    | -0.0027362 |
| RRAS     | -0.0027336 |
| USP7     | -0.0027321 |
| PARK7    | -0.0027298 |
| RPS5     | 0.00272749 |
| GTF3C5   | -0.0027254 |
| LACTB    | -0.0027226 |
| PSMA6    | -0.0027212 |
| TAF5L    | 0.00272026 |
| NDEL1    | -0.0027199 |
| XKR8     | 0.00271955 |
| SOX9     | -0.0027127 |
| DGCR8    | 0.00271024 |
| AP4B1    | 0.00270969 |
| ABAT     | -0.0027083 |
| SH3BP5L  | 0.00270511 |
| ATG4A    | -0.0027045 |
| GLB1     | 0.00270228 |
| DCAF11   | 0.0027021  |
| OSBPL6   | -0.0027008 |
| SMG7     | -0.0026994 |
| BAZ2A    | 0.00269667 |
| FBRSL1   | -0.0026964 |
| TRIM23   | -0.002695  |
| SCAF11   | 0.00269318 |
| TBCE     | -0.0026899 |
| MTPN     | 0.00268941 |
| CAPN6    | 0.0026875  |
| FOXM1    | 0.00268713 |
| UCP2     | 0.00268474 |
| SLC25A47 | -0.0026813 |
| FBXO36   | 0.00268044 |
| PSMD1    | 0.00268043 |
| NDUFB6   | -0.0026802 |
| KPNA4    | 0.00268012 |
| CDKAL1   | -0.0026778 |
| SLC30A9  | -0.0026775 |
| APEX1    | 0.00267661 |

|          |            |
|----------|------------|
| TPP2     | 0.00267496 |
| XRCC3    | -0.0026734 |
| DROSHA   | 0.00267033 |
| ATE1     | 0.00266915 |
| SACM1L   | 0.00266709 |
| MADD     | -0.0026668 |
| BAG3     | -0.0026656 |
| PMM1     | 0.00266385 |
| LARP4B   | -0.002661  |
| TXNDC15  | -0.0026587 |
| MAP2K7   | -0.0026582 |
| SHISA4   | -0.0026577 |
| FDX1     | 0.00265708 |
| LDB2     | -0.002657  |
| AHI1     | -0.0026567 |
| FAM76B   | -0.0026541 |
| YRDC     | 0.0026534  |
| SMPD2    | -0.0026527 |
| ALDH7A1  | 0.00265164 |
| FAM168B  | 0.00265132 |
| TCIRG1   | -0.002649  |
| PI4KB    | -0.0026437 |
| GCLC     | 0.00263876 |
| ALKBH8   | 0.00263616 |
| GALM     | -0.0026355 |
| ATP6V0A1 | -0.0026351 |
| MYH9     | -0.0026329 |
| DHRS7B   | 0.00263292 |
| GAS6     | -0.0026315 |
| CSDC2    | -0.0026273 |
| BRD8     | -0.0026272 |
| TMBIM1   | 0.00262474 |
| WDFY1    | -0.0026243 |
| FAM55C   | -0.0026225 |
| LIN9     | -0.002619  |
| JDP2     | 0.00261865 |
| KLHDC1   | -0.0026186 |
| FAM48A   | -0.0026143 |
| LETM1    | 0.00261322 |
| PSMC3IP  | 0.00261194 |
| ETAA1    | -0.0026063 |
| COX5B    | -0.0026062 |

|          |            |
|----------|------------|
| PLAGL2   | -0.0026059 |
| SNAPC4   | -0.0026051 |
| TFPT     | 0.00260481 |
| MED26    | 0.00260334 |
| MTFR1    | 0.00260301 |
| EXOC1    | 0.00260029 |
| NDUFB2   | -0.0025966 |
| CRBN     | -0.0025944 |
| PCYOX1   | -0.0025942 |
| AADAT    | -0.0025923 |
| ORAOV1   | 0.00258867 |
| SCRN3    | 0.00258725 |
| SLC25A12 | 0.00258511 |
| ST3GAL1  | -0.0025815 |
| ANKZF1   | 0.00258149 |
| B3GAT3   | -0.002581  |
| CDC23    | 0.00257993 |
| EIF2D    | -0.0025776 |
| CDC25C   | 0.0025765  |
| SLC25A39 | 0.00257063 |
| KIF27    | -0.0025706 |
| UHRF2    | 0.00257016 |
| CLINT1   | 0.00256824 |
| TRAPPC4  | 0.00256814 |
| ZFYVE26  | -0.0025681 |
| HLTF     | -0.0025664 |
| CDR2     | -0.0025652 |
| ACAD9    | -0.0025636 |
| FGFRL1   | 0.00256302 |
| TLCD2    | -0.0025629 |
| TJP1     | -0.0025611 |
| PRIM1    | -0.0025607 |
| TEX264   | -0.0025605 |
| CHMP4C   | -0.0025582 |
| CAP2     | 0.00255793 |
| ARNT2    | -0.0025559 |
| CHKA     | -0.002555  |
| ABL2     | -0.002555  |
| AK4      | 0.00255228 |
| TEF      | 0.00255192 |
| TTYH2    | 0.00255164 |
| CPNE3    | -0.0025509 |

|          |            |
|----------|------------|
| ORC2     | 0.00254934 |
| BIN3     | 0.00254725 |
| MTSS1    | -0.002542  |
| MITD1    | -0.0025416 |
| ZBTB45   | 0.00254006 |
| RAP1GAP2 | 0.00253713 |
| ATG4D    | 0.00253554 |
| HN1      | 0.00253256 |
| RHOBTB3  | 0.00253165 |
| BAG2     | -0.0025309 |
| EIF4E3   | -0.0025257 |
| GALT     | 0.00252524 |
| SYT12    | -0.0025222 |
| SLC7A2   | 0.00252171 |
| WBP11    | -0.0025198 |
| MPDZ     | -0.0025167 |
| TFDP2    | 0.00251416 |
| SEC31A   | 0.00251273 |
| MRPL44   | -0.0025118 |
| LRP11    | 0.00251112 |
| B4GALNT3 | -0.0025092 |
| RPL11    | 0.00250707 |
| ST14     | -0.0025051 |
| PDCD5    | -0.0025038 |
| MPV17L2  | -0.0025025 |
| MKLN1    | -0.002502  |
| SGSH     | 0.00250106 |
| CFDP1    | -0.0025003 |
| C2CD2    | -0.0025001 |
| PPIF     | 0.00249946 |
| MTFMT    | -0.002497  |
| SH3BGR   | -0.0024933 |
| QRSL1    | 0.00249269 |
| RFC4     | 0.00249068 |
| LPHN2    | 0.00247853 |
| CUL3     | 0.00247843 |
| HMGXB3   | 0.00247364 |
| ZBTB9    | -0.0024703 |
| TADA1    | -0.0024621 |
| MAFK     | -0.0024615 |
| MCM9     | -0.0024607 |
| MSRA     | 0.00246071 |



|          |            |
|----------|------------|
| EXD2     | -0.0024569 |
| PPP1CC   | 0.00245208 |
| DCTN6    | -0.0024513 |
| RAB7L1   | -0.0024482 |
| BRP44    | -0.0024435 |
| LMBRD2   | 0.00244283 |
| NAT8L    | -0.0024424 |
| RNF126   | -0.0024416 |
| GGA2     | 0.00243734 |
| CSRP2BP  | 0.00243566 |
| RERE     | -0.0024355 |
| BOK      | -0.0024327 |
| EIF4G2   | 0.002431   |
| POFUT1   | -0.0024283 |
| SH3BP4   | -0.0024282 |
| SCYL1    | 0.00242483 |
| PDE2A    | -0.0024235 |
| ARL6     | -0.0024222 |
| PSMC6    | 0.00242022 |
| ACBD5    | -0.0024199 |
| OGDHL    | -0.0024197 |
| ARMC8    | -0.0024192 |
| SMYD2    | 0.0024191  |
| COQ6     | 0.00241488 |
| EIF2C3   | -0.0024142 |
| ALG9     | -0.0024138 |
| RELL1    | 0.00241229 |
| JAM3     | 0.00241171 |
| ADAR     | -0.0024112 |
| RBM28    | 0.00239932 |
| RAC1     | 0.00239701 |
| SMC4     | 0.00239595 |
| TM6SF1   | 0.00239545 |
| CDC27    | -0.0023942 |
| NDUFS8   | 0.00238794 |
| MAPK3    | -0.0023878 |
| ANGPTL2  | -0.0023858 |
| CCAR1    | 0.00238145 |
| TMEM167B | -0.0023806 |
| GPS1     | 0.00237989 |
| GPATCH2  | 0.00237764 |
| MOB4     | -0.0023771 |

|           |            |
|-----------|------------|
| CSRP1     | -0.002377  |
| ELAVL2    | -0.0023752 |
| ATG7      | -0.0023748 |
| GSK3A     | -0.0023741 |
| SPRED2    | -0.0023691 |
| CCNA2     | 0.00236868 |
| MMADHC    | -0.0023668 |
| DCAF13    | 0.00236315 |
| ARHGEF10L | -0.0023626 |
| EXOSC2    | 0.00236192 |
| CAMKK1    | -0.0023612 |
| NUP160    | 0.00235906 |
| UNK       | -0.002358  |
| SSNA1     | -0.002356  |
| CD247     | -0.0023552 |
| MYLIP     | -0.0023513 |
| USP31     | -0.0023497 |
| USP30     | -0.002348  |
| NT5DC1    | 0.00234723 |
| MTRF1L    | 0.00234674 |
| TRAPPC3   | 0.00234604 |
| CCDC115   | 0.00234388 |
| COX4I2    | 0.00234361 |
| SIKE1     | -0.0023388 |
| SLC25A26  | -0.0023369 |
| SEC23IP   | 0.00233689 |
| USPL1     | 0.00233291 |
| VPRBP     | -0.0023329 |
| TOB2      | -0.0023282 |
| ITM2C     | 0.00232769 |
| PPM1G     | 0.00232625 |
| MLH1      | 0.00232618 |
| EXOSC1    | 0.00232298 |
| ATP6V0C   | -0.0023228 |
| LCMT1     | -0.0023214 |
| AKR1A1    | 0.0023213  |
| PIGU      | -0.0023199 |
| HSPBAP1   | 0.00231969 |
| P4HA2     | -0.0023188 |
| ABCB7     | -0.0023169 |
| NR1H2     | 0.00231645 |
| ABHD13    | 0.00231614 |

|          |            |
|----------|------------|
| FKBP5    | 0.00231594 |
| TSC22D2  | -0.0023135 |
| VPS4B    | 0.00231079 |
| EPS15L1  | -0.0023107 |
| PRSS53   | -0.0023091 |
| FGFR1    | -0.0023077 |
| DPY19L3  | -0.0023062 |
| NSF      | -0.0023058 |
| KLC4     | -0.0023042 |
| DHX29    | 0.00230409 |
| CARS2    | 0.00230374 |
| HDDC2    | -0.0023031 |
| NUDT6    | 0.00230291 |
| NEU1     | -0.0023029 |
| APPL1    | -0.002302  |
| F2R      | 0.00230182 |
| SEC14L1  | -0.0023013 |
| TMEM79   | -0.0023002 |
| CCDC77   | -0.0022998 |
| FBXL4    | 0.00229838 |
| B3GALNT2 | 0.00229662 |
| AK1      | -0.0022928 |
| UBE2K    | 0.00229267 |
| C1D      | -0.0022917 |
| CDKN2AIP | -0.0022914 |
| TRA2B    | 0.00229102 |
| ANGPTL7  | 0.00229084 |
| GOLGA7   | 0.00228987 |
| PUS3     | -0.0022854 |
| TJP2     | 0.00228456 |
| USP16    | 0.00228309 |
| PBRM1    | -0.0022829 |
| CPSF6    | 0.0022792  |
| HSD17B10 | -0.0022786 |
| ATR      | -0.0022781 |
| LRRC42   | -0.0022771 |
| PEX6     | 0.00227575 |
| BCAS2    | -0.0022749 |
| AQR      | 0.00227475 |
| CCDC43   | 0.00227342 |
| PDXK     | -0.0022704 |
| BBS12    | 0.00226949 |

|          |            |
|----------|------------|
| PIF1     | 0.00226909 |
| TRNT1    | 0.00226687 |
| HERPUD1  | 0.00226471 |
| UFC1     | -0.0022602 |
| KRI1     | -0.0022577 |
| ZBTB8OS  | 0.00225764 |
| SLC6A15  | -0.0022575 |
| TMEM53   | 0.00225574 |
| MRPL24   | 0.00225393 |
| NBAS     | 0.00225101 |
| ASAP1    | -0.0022496 |
| PEX1     | 0.00224806 |
| RPS6KA2  | -0.0022462 |
| ARAP3    | 0.00224578 |
| TMEM186  | 0.00224462 |
| PEX11B   | -0.0022437 |
| AKAP8L   | 0.00224148 |
| MAST3    | -0.0022404 |
| RIMKLB   | -0.0022391 |
| ESRRG    | -0.0022383 |
| EIF2AK3  | -0.0022374 |
| PPP3CC   | -0.0022346 |
| TOP2A    | -0.0022335 |
| BUD13    | 0.00223203 |
| PPFIBP1  | -0.0022286 |
| CYTH3    | -0.0022271 |
| SRSF5    | 0.00222634 |
| VAPA     | -0.0022261 |
| TXNDC12  | 0.0022247  |
| GPN1     | 0.00222374 |
| ATP6V1D  | 0.00222291 |
| ADPRH    | -0.0022224 |
| TACC1    | -0.0022212 |
| OSBPL11  | 0.00221963 |
| ELP2     | -0.002215  |
| GZF1     | 0.00221422 |
| SH3BGRL3 | 0.00221224 |
| FAM175A  | 0.00220979 |
| PTDSS2   | 0.00220585 |
| PRR12    | -0.0022042 |
| MKKS     | 0.00219962 |
| SYNGR3   | -0.0021977 |

|         |            |
|---------|------------|
| GNL2    | -0.0021973 |
| DTYMK   | 0.00219715 |
| MAP2K5  | 0.00219505 |
| ATP5C1  | 0.00219314 |
| LENG8   | -0.0021928 |
| E2F1    | 0.00219175 |
| CEP63   | -0.0021915 |
| CNN3    | 0.00219054 |
| OMD     | -0.0021895 |
| COMMD2  | -0.002189  |
| STARD8  | -0.0021889 |
| RPL35   | 0.00218528 |
| SUOX    | -0.0021848 |
| ANKLE2  | -0.0021839 |
| STEAP2  | -0.00218   |
| KATNAL2 | -0.0021799 |
| SENP3   | -0.0021795 |
| OSBPL9  | -0.0021753 |
| UBE2G1  | -0.0021746 |
| ABT1    | 0.00217118 |
| FAM110A | -0.0021697 |
| CHCHD8  | -0.0021686 |
| FTSJD2  | -0.0021635 |
| CENPL   | -0.0021606 |
| ADNP2   | -0.00216   |
| HECTD3  | -0.0021599 |
| WASF1   | 0.00215937 |
| ILDR2   | -0.0021587 |
| SLC30A7 | 0.0021579  |
| SNRNP48 | -0.0021566 |
| BTAF1   | 0.00215562 |
| MRPL54  | -0.0021554 |
| SS18    | -0.0021491 |
| USP6NL  | 0.00214535 |
| PRKAA1  | -0.0021438 |
| MTTP    | -0.0021392 |
| GNB4    | -0.0021385 |
| EXOC8   | -0.0021383 |
| TTC21B  | 0.00213748 |
| YTHDF1  | -0.0021357 |
| CLPTM1L | -0.0021345 |
| PRKAG2  | -0.0021338 |

|          |            |
|----------|------------|
| FES      | -0.0021336 |
| RNF114   | 0.00213231 |
| NCKAP1   | 0.00213103 |
| CAPG     | 0.00212912 |
| RNF165   | -0.0021265 |
| RTTN     | 0.00212561 |
| SEPSECS  | 0.00212048 |
| PYROXD1  | -0.0021194 |
| COBRA1   | 0.00211734 |
| TAF1B    | 0.00211497 |
| CEND1    | -0.0021122 |
| VEPH1    | 0.00211219 |
| THAP11   | -0.002109  |
| PRDM1    | -0.002108  |
| ATF1     | 0.00210779 |
| IQCC     | -0.0021074 |
| ARHGAP39 | -0.0021074 |
| NCOA5    | -0.002106  |
| PTGES2   | 0.00210427 |
| MAN1B1   | 0.00210325 |
| CHMP4B   | -0.002102  |
| TARSL2   | 0.00210107 |
| ORAI1    | 0.00210075 |
| POLD3    | -0.0020981 |
| POU2F1   | 0.00209709 |
| RNF41    | 0.00209265 |
| PDCL     | -0.0020909 |
| CIB1     | -0.0020908 |
| TCERG1   | -0.0020894 |
| BRAP     | -0.0020888 |
| GAPDHS   | -0.0020884 |
| HECTD1   | -0.002088  |
| CREB3    | 0.00208797 |
| ITGB1    | 0.00208757 |
| INPP1    | 0.0020871  |
| AGXT2L2  | -0.0020848 |
| PNP      | 0.00208269 |
| NCAPH    | 0.00208132 |
| VMA21    | -0.0020794 |
| SPG7     | 0.00207919 |
| AP1M1    | -0.0020789 |
| PRDM5    | -0.002078  |

|         |            |
|---------|------------|
| SLC43A2 | 0.00207531 |
| LHFPL4  | 0.00207382 |
| TBC1D17 | -0.0020735 |
| USP14   | -0.0020733 |
| IBTK    | -0.0020695 |
| XYLT2   | -0.0020693 |
| TWF1    | -0.0020676 |
| SLCO3A1 | -0.0020674 |
| KIF7    | -0.0020666 |
| TMEM41A | 0.00206502 |
| IWS1    | 0.00206446 |
| TERT    | 0.00206295 |
| R3HDM1  | -0.0020619 |
| ATOH8   | 0.00206182 |
| PPP1CA  | 0.00206152 |
| RNF144A | -0.0020607 |
| CPSF1   | -0.0020605 |
| SF3B5   | 0.00206004 |
| PDK1    | -0.0020594 |
| PREPL   | 0.00205892 |
| USP45   | 0.00205837 |
| MORC3   | 0.00205383 |
| PHF10   | -0.0020526 |
| CCDC91  | -0.0020521 |
| CHST12  | -0.0020505 |
| NDUFAF2 | -0.0020505 |
| EEF2    | -0.0020492 |
| IFT140  | -0.002048  |
| UBE2J2  | 0.00204757 |
| FUBP1   | 0.00204683 |
| RBM45   | 0.00204576 |
| DZIP1L  | 0.00204088 |
| LEPROT  | -0.002039  |
| TM9SF2  | 0.00203698 |
| RBKS    | -0.0020362 |
| CCDC90B | 0.0020339  |
| BRCA2   | 0.00203283 |
| SLC20A2 | 0.00203048 |
| LACTB2  | 0.00203038 |
| UXT     | -0.0020287 |
| KIF2A   | -0.002028  |
| CD226   | -0.0020243 |

|         |            |
|---------|------------|
| PHRF1   | 0.00201891 |
| GPR156  | -0.0020184 |
| TRIM24  | -0.0020169 |
| CITED2  | -0.0020138 |
| MED12   | -0.0020136 |
| CD2AP   | -0.0020115 |
| F13A1   | -0.0020083 |
| UQCRC2  | -0.0020054 |
| CHRAC1  | -0.0020045 |
| MRPL51  | -0.0020035 |
| CTSC    | 0.00200337 |
| SLC45A4 | -0.0020026 |
| GRPEL2  | 0.00200004 |
| DCUN1D5 | -0.0019997 |
| THBS1   | -0.0019991 |
| PREX1   | 0.00199496 |
| COQ2    | -0.0019929 |
| SPCS3   | 0.00199126 |
| EIF4G1  | 0.00199064 |
| THNSL1  | 0.00198848 |
| ZFR     | 0.00198658 |
| RNF123  | -0.0019849 |
| SAMD8   | -0.0019839 |
| FUS     | 0.00198322 |
| FAM82B  | -0.0019799 |
| RGS3    | -0.001978  |
| INTS1   | -0.0019695 |
| MCM8    | 0.00196766 |
| HCFC1   | 0.0019648  |
| LRP4    | -0.0019645 |
| DOCK10  | -0.0019641 |
| TMEM85  | -0.0019634 |
| CEBPG   | -0.0019589 |
| TTLL5   | 0.00195765 |
| RRAS2   | 0.00195686 |
| SLC38A2 | -0.001954  |
| NT5C2   | -0.0019534 |
| TRIOBP  | -0.0019533 |
| TIAL1   | -0.0019524 |
| ROBO4   | -0.0019478 |
| RLIM    | -0.0019476 |
| ANXA5   | 0.00194639 |



|         |            |
|---------|------------|
| SPAG1   | -0.0019417 |
| CHCHD1  | 0.00194117 |
| ROR2    | 0.001941   |
| VPS45   | -0.00194   |
| PPP2CA  | -0.001939  |
| NINJ1   | -0.0019378 |
| NPTN    | -0.0019363 |
| MLF1IP  | 0.00193494 |
| GOLT1B  | 0.00193415 |
| FABP5   | -0.0019336 |
| ALG11   | 0.0019282  |
| RAD21   | -0.0019281 |
| TNKS2   | -0.0019261 |
| PGM3    | 0.00192405 |
| PPWD1   | 0.00192403 |
| RPRD1A  | 0.00192376 |
| DNAJC1  | -0.0019231 |
| FOXRED1 | 0.00192177 |
| MED21   | -0.0019194 |
| CAMKK2  | 0.00191922 |
| WDR70   | 0.00191848 |
| COMTD1  | 0.00191676 |
| KPTN    | 0.00191593 |
| COQ9    | 0.00191535 |
| DOLPP1  | -0.001915  |
| PHTF1   | -0.0019141 |
| MSL2    | -0.0019122 |
| CLTA    | -0.0019114 |
| HDLBP   | 0.00191026 |
| CDK8    | -0.0019019 |
| MMD     | -0.0018991 |
| FBXO8   | -0.0018958 |
| HAUS5   | 0.00189276 |
| CKS2    | 0.00189271 |
| DNAJA1  | 0.00189222 |
| EXOSC8  | 0.00189215 |
| SYDE1   | -0.0018881 |
| ING2    | -0.0018861 |
| COG1    | -0.0018855 |
| PNO1    | 0.00188456 |
| PLRG1   | 0.00188049 |
| ARPP21  | -0.0018771 |

|          |            |
|----------|------------|
| TTLL12   | -0.0018767 |
| BMP7     | 0.00187363 |
| KLHDC8B  | 0.00187241 |
| CBLB     | 0.00187095 |
| INTS7    | 0.00187027 |
| MCPH1    | 0.00186995 |
| MKRN2    | -0.0018684 |
| UBXN7    | -0.0018683 |
| MRS2     | -0.0018636 |
| FBXW4    | -0.0018636 |
| CPNE1    | 0.00186352 |
| KIF6     | -0.0018629 |
| VEGFA    | -0.0018627 |
| BUD31    | 0.00186087 |
| DAG1     | -0.0018604 |
| NACC1    | 0.0018563  |
| TAF7     | -0.0018562 |
| KCTD5    | 0.00185089 |
| DIDO1    | 0.00185086 |
| SLC35B3  | -0.0018506 |
| NDUFS2   | -0.0018485 |
| KCTD20   | 0.00184675 |
| SLC5A10  | 0.00184555 |
| DNMT1    | -0.001845  |
| LARP7    | -0.0018412 |
| OXSRI    | 0.00184038 |
| CCDC102A | -0.0018378 |
| PRPF6    | -0.0018357 |
| AKAP10   | -0.0018328 |
| COPS5    | 0.0018322  |
| HSP90AB1 | 0.0018318  |
| MPI      | -0.0018314 |
| RAB23    | 0.00183029 |
| COASY    | -0.0018298 |
| TOLLIP   | -0.0018275 |
| SNAPC2   | 0.00182689 |
| ARNTL    | -0.0018249 |
| RNPC3    | -0.0018191 |
| GBA2     | 0.00181881 |
| PIBF1    | 0.00181864 |
| DLX3     | 0.00181465 |
| MTPAP    | -0.0018125 |

|          |            |
|----------|------------|
| NBN      | -0.0018107 |
| PCYT1A   | 0.0018096  |
| BLZF1    | -0.0018092 |
| CCDC53   | 0.00180774 |
| RPL7A    | 0.00180573 |
| UBA6     | 0.00180556 |
| ISCU     | -0.0018054 |
| ETV6     | -0.0018042 |
| CLN6     | -0.0018018 |
| H6PD     | -0.0018    |
| NUP43    | 0.00179669 |
| RINL     | -0.0017963 |
| GTF3C3   | 0.00179477 |
| S1PR2    | 0.00179431 |
| LRCH2    | -0.0017932 |
| PPP4R2   | -0.001791  |
| ACOX1    | 0.00179021 |
| LRRK2    | 0.00178929 |
| HLCS     | -0.0017879 |
| HNRNPD   | -0.0017879 |
| ABCF1    | 0.00178707 |
| PLXND1   | -0.001783  |
| APOBEC2  | -0.0017785 |
| CHSY1    | -0.0017772 |
| TMCO7    | 0.00177627 |
| EDEM2    | -0.0017762 |
| DENND1A  | -0.0017754 |
| RNF17    | 0.00177356 |
| MYCBP    | 0.00177221 |
| CCDC132  | -0.001768  |
| AMIGO2   | 0.001766   |
| HVCN1    | -0.0017632 |
| FAM84B   | -0.0017609 |
| PKN2     | -0.0017607 |
| NPC1     | -0.0017601 |
| HYLS1    | -0.0017576 |
| LSM10    | 0.00175653 |
| RGS20    | -0.0017555 |
| PRPF8    | 0.0017541  |
| DHX30    | 0.00175164 |
| USP28    | -0.0017483 |
| RAB3GAP1 | -0.0017479 |

|            |            |
|------------|------------|
| APCDD1     | -0.0017476 |
| TRAF6      | -0.0017469 |
| UPK1A      | -0.0017459 |
| DHRS13     | 0.00174515 |
| USP46      | -0.0017426 |
| MMRN1      | -0.0017416 |
| MRP63      | 0.00174109 |
| TTC9C      | -0.0017408 |
| WDR83      | 0.00174007 |
| FAM118B    | 0.00173972 |
| MMACHC     | 0.00173961 |
| KPNA6      | -0.0017394 |
| SMEK2      | -0.0017379 |
| MIER2      | -0.0017369 |
| PSMF1      | 0.00173673 |
| MBOAT7     | -0.0017366 |
| DGKZ       | 0.00173624 |
| SLC9A7     | -0.0017355 |
| KRT18      | -0.0017354 |
| SLC35D1    | 0.0017351  |
| ZBTB2      | 0.00173502 |
| RARS2      | 0.00173422 |
| NDUFS5     | 0.00173117 |
| CDK16      | -0.00173   |
| WDR54      | 0.00172532 |
| MAK        | -0.001725  |
| BMP6       | -0.0017198 |
| DCTN2      | -0.0017173 |
| PLEKHM3    | 0.00171667 |
| GOPC       | 0.00171523 |
| CDK5RAP1   | -0.0017145 |
| LRRFIP2    | -0.0017134 |
| CYB5R2     | -0.001713  |
| ARPC2      | -0.0017126 |
| N4BP2      | 0.00171242 |
| ATAD2      | 0.00170989 |
| LETMD1     | 0.00170937 |
| TEP1       | -0.0017085 |
| ST6GALNAC2 | 0.00170842 |
| STUB1      | -0.0017076 |
| USP36      | 0.00170501 |
| TNFRSF11B  | -0.0017035 |

|           |            |
|-----------|------------|
| NUDT16    | 0.00170345 |
| ANGEL1    | 0.00170235 |
| WEE1      | -0.0017017 |
| CUL2      | -0.0017012 |
| TXN2      | 0.00169674 |
| HSF1      | 0.00169577 |
| CWC25     | -0.0016953 |
| CTR9      | 0.001695   |
| PPP6R3    | 0.00169427 |
| ILKAP     | -0.0016891 |
| EXOC7     | -0.0016874 |
| FAM174A   | -0.0016867 |
| SHC4      | -0.0016841 |
| TPT1      | -0.0016801 |
| PWWP2A    | -0.0016799 |
| CRELD2    | -0.0016797 |
| PCMT1     | -0.0016796 |
| COMMD1    | 0.00167817 |
| TRIM13    | -0.0016737 |
| ATXN2L    | -0.0016723 |
| AMMECR1L  | -0.0016676 |
| ZW10      | 0.001665   |
| DCBLD1    | -0.0016625 |
| CNOT6L    | -0.0016622 |
| PPP1R12C  | 0.00166124 |
| QRICH1    | -0.0016608 |
| METTLL21D | -0.0016596 |
| HAGH      | 0.00165902 |
| SEC61G    | -0.0016588 |
| BCDIN3D   | 0.00165844 |
| PDLIM2    | 0.00165607 |
| TMEM55A   | -0.0016559 |
| DNAJC7    | 0.00165363 |
| ATP6V1C1  | -0.0016517 |
| TAF1D     | 0.00165165 |
| PHF8      | -0.001651  |
| NPL       | 0.00164889 |
| PDLIM7    | -0.0016461 |
| DLG1      | -0.0016449 |
| PDCD2     | -0.0016439 |
| ASTE1     | -0.0016427 |
| TTC35     | 0.00163996 |

|          |            |
|----------|------------|
| EAPP     | -0.0016366 |
| PPFIBP2  | 0.00163643 |
| ENOX2    | -0.0016364 |
| DYNC1H1  | -0.0016307 |
| NEDD1    | -0.0016297 |
| ESD      | -0.0016279 |
| CENPF    | 0.00162778 |
| CPPED1   | -0.0016266 |
| KIF16B   | -0.0016241 |
| SMCR8    | 0.00162261 |
| SLC30A1  | -0.0016202 |
| STAT3    | -0.0016198 |
| TMEM60   | 0.0016186  |
| GIT1     | 0.00161816 |
| GOLGA5   | 0.00161543 |
| SP4      | -0.001614  |
| ZC3H7B   | -0.0016135 |
| WDR1     | 0.00161072 |
| CD93     | -0.0016103 |
| SEMA3A   | 0.00160352 |
| PLEKHF1  | 0.00160339 |
| FANCF    | 0.00160117 |
| LRIG1    | 0.00159941 |
| TRPM6    | -0.0015989 |
| SOD1     | 0.00159849 |
| PDCL3    | 0.00159809 |
| AMT      | 0.00159731 |
| MED23    | 0.0015961  |
| TRAK2    | -0.0015955 |
| RAD52    | -0.0015955 |
| TOP3A    | 0.00159382 |
| MTERF    | -0.0015931 |
| MGST1    | -0.0015922 |
| LGMN     | 0.00159173 |
| COG6     | -0.0015898 |
| GOLM1    | -0.0015886 |
| CHD5     | 0.00158513 |
| DNAJA4   | 0.00158218 |
| TMEM184B | -0.0015821 |
| COX17    | 0.00158143 |
| KCNJ13   | -0.0015774 |
| RCBTB1   | 0.00157563 |

|         |            |
|---------|------------|
| SCYL3   | -0.0015754 |
| WDR7    | -0.0015753 |
| MTM1    | -0.0015736 |
| JAGN1   | 0.00157147 |
| CLPB    | -0.0015705 |
| MLL2    | -0.0015696 |
| HEATR2  | 0.00156901 |
| RNF149  | 0.00156732 |
| MTX3    | 0.00156701 |
| CCDC158 | -0.0015661 |
| CANX    | -0.001565  |
| PPP1CB  | 0.0015639  |
| NPHP4   | 0.00155748 |
| CGN     | -0.0015568 |
| DHODH   | 0.00155432 |
| SMARCB1 | -0.001554  |
| CENPC1  | -0.0015531 |
| DCBLD2  | -0.0015527 |
| PPP2R5D | 0.00155022 |
| SSR3    | 0.00154941 |
| EMILIN1 | 0.00154918 |
| CDK10   | 0.00154862 |
| CREBL2  | 0.00154728 |
| INPP5B  | -0.0015459 |
| CTNNAL1 | -0.0015434 |
| SGOL1   | 0.00154275 |
| RCBTB2  | 0.00154055 |
| APTX    | -0.0015396 |
| GTF2H5  | -0.0015346 |
| DUSP1   | -0.0015321 |
| COPS7B  | 0.00153035 |
| PRKAR1A | -0.0015261 |
| CENPJ   | -0.0015249 |
| TOP3B   | -0.0015246 |
| ECHDC2  | -0.0015238 |
| AP4M1   | -0.0015233 |
| COMMD7  | -0.0015171 |
| CLN5    | -0.0015155 |
| SMAD4   | 0.00151506 |
| ANAPC1  | -0.0015143 |
| FAM54B  | 0.00151427 |
| RPL10A  | 0.00151245 |

|         |            |
|---------|------------|
| HERC2   | -0.0015122 |
| FANCM   | 0.00151106 |
| CD44    | 0.00150902 |
| NAB1    | -0.0015086 |
| GTF2F1  | 0.0015075  |
| ITM2A   | 0.00150595 |
| CHD1L   | -0.0015058 |
| SCYL2   | -0.0015046 |
| RASGRP1 | -0.0015037 |
| CCDC94  | 0.0015033  |
| RPIA    | 0.00150311 |
| RNF40   | -0.0015014 |
| PER1    | 0.00150005 |
| KATNA1  | 0.00149877 |
| KCNQ5   | -0.0014976 |
| ERCC4   | -0.0014967 |
| PAPD5   | -0.0014952 |
| SRRM1   | -0.0014949 |
| TRIT1   | -0.0014929 |
| SHFM1   | -0.0014916 |
| STT3A   | 0.00149098 |
| TM9SF3  | 0.00149093 |
| NSUN6   | 0.0014875  |
| CNOT10  | 0.00148701 |
| BRPF3   | 0.00148632 |
| PRUNE   | -0.0014841 |
| SNAP29  | -0.0014839 |
| PTDSS1  | -0.0014826 |
| LIPA    | 0.00148154 |
| ATG12   | 0.00148126 |
| TIMM50  | -0.0014808 |
| GTF3A   | -0.0014802 |
| TMEM69  | 0.00147987 |
| MTA1    | -0.0014798 |
| NUCKS1  | 0.0014794  |
| GGA1    | -0.0014794 |
| TESK1   | -0.0014793 |
| CCNL2   | -0.0014785 |
| CDKL1   | 0.00147781 |
| RBM17   | 0.00147666 |
| RAP2B   | 0.00147442 |
| DPH2    | 0.00147385 |



|          |            |
|----------|------------|
| SNX1     | 0.00147313 |
| WNT5B    | 0.00147224 |
| SAMD14   | -0.0014714 |
| ZC3HC1   | 0.0014703  |
| YWHAQ    | 0.00146976 |
| PCYT2    | 0.00146894 |
| INO80D   | -0.0014658 |
| SPEG     | -0.0014651 |
| AKAP1    | -0.0014615 |
| TAF5     | 0.00145999 |
| PPM1B    | -0.0014576 |
| IFRD1    | 0.00145466 |
| ZNHIT3   | 0.00145372 |
| TMX3     | 0.00145168 |
| AKAP11   | -0.0014505 |
| MRPL48   | 0.00144849 |
| SSBP1    | 0.00144356 |
| RAB33B   | -0.0014434 |
| MAZ      | -0.0014427 |
| SPIN1    | -0.0014404 |
| ACBD6    | -0.0014347 |
| RHOU     | 0.00142784 |
| TEX261   | -0.0014237 |
| AMMECR1  | 0.00141437 |
| RBPMS    | -0.0014099 |
| RNF115   | -0.0013999 |
| MFSD8    | 0.00139974 |
| DIS3     | -0.001396  |
| LMO3     | 0.00139505 |
| GPR146   | -0.0013946 |
| INTS2    | 0.00139078 |
| TEAD2    | 0.00138893 |
| GTF2H1   | 0.00138787 |
| DYNC1LI2 | 0.00138657 |
| PIGN     | -0.0013859 |
| KHDRBS1  | -0.0013858 |
| FEZ2     | 0.00138569 |
| PDCD6IP  | -0.0013814 |
| STX1A    | 0.00137917 |
| RHOT1    | 0.001379   |
| ZBTB1    | -0.0013782 |
| ITSN1    | -0.0013735 |

|          |            |
|----------|------------|
| TECPR1   | -0.001373  |
| LUZP1    | -0.0013728 |
| NADSYN1  | -0.0013714 |
| GRAMD4   | 0.00137108 |
| AZI1     | 0.00137036 |
| DVL1     | -0.0013698 |
| MRPS33   | -0.0013693 |
| CC2D1B   | 0.00136735 |
| LCA5     | -0.0013668 |
| RNASEH2B | -0.0013588 |
| ING1     | -0.0013576 |
| MTMR14   | 0.00135735 |
| SRSF1    | 0.00135642 |
| SPNS1    | 0.0013528  |
| ARHGAP4  | -0.0013498 |
| LMBR1L   | -0.0013491 |
| CENPK    | -0.0013457 |
| LYRM5    | 0.00134537 |
| BICD1    | -0.001345  |
| CCDC47   | -0.0013442 |
| SCARB2   | -0.0013432 |
| PRG4     | -0.0013428 |
| SLC25A14 | -0.0013419 |
| LSM5     | -0.0013412 |
| SEC22C   | -0.00134   |
| SUMO1    | 0.00133658 |
| DYNC1LI1 | -0.0013342 |
| IFNGR1   | 0.00133222 |
| FAM78B   | -0.00133   |
| VASP     | 0.0013272  |
| ELK3     | -0.0013263 |
| DDAH1    | -0.001325  |
| CSRNP3   | -0.0013234 |
| FEM1B    | -0.0013233 |
| SLC41A3  | 0.00132213 |
| FRMD4B   | -0.0013208 |
| ERI2     | 0.00131791 |
| FBXW2    | 0.00131741 |
| PDCD7    | 0.00131737 |
| LUC7L    | 0.00131599 |
| PCGF2    | -0.0013148 |
| NUDT2    | -0.0013143 |

|         |            |
|---------|------------|
| SLC6A6  | -0.0013133 |
| B3GNT7  | 0.00131158 |
| CSNK2A2 | 0.00131074 |
| OBFC2B  | 0.00130564 |
| SENP1   | 0.0013056  |
| CEP120  | -0.0013055 |
| RFC2    | 0.00130373 |
| ZBTB44  | -0.0013025 |
| NFU1    | -0.0013019 |
| SLC23A1 | -0.0013009 |
| USP1    | 0.00130062 |
| OXSM    | 0.00129797 |
| APEX2   | 0.00129419 |
| DDX46   | -0.0012929 |
| MCCC1   | 0.00129275 |
| GTPBP6  | -0.0012927 |
| ACSF3   | -0.0012908 |
| GORASP2 | -0.0012903 |
| PLEKHA6 | 0.00128958 |
| ARIH1   | -0.0012888 |
| NRP1    | 0.00128858 |
| PNPT1   | 0.00128856 |
| CASP3   | -0.0012873 |
| NDUFB9  | -0.0012835 |
| NT5M    | 0.00127983 |
| PRDM4   | 0.00127963 |
| ADCY3   | -0.0012781 |
| ARL5B   | -0.0012744 |
| DDX59   | -0.0012743 |
| ACACB   | -0.001274  |
| SPOPL   | -0.0012725 |
| GALNT2  | -0.0012723 |
| GORAB   | -0.0012713 |
| MED4    | 0.00127004 |
| HSD17B4 | -0.0012693 |
| KDM3B   | -0.0012669 |
| VCP     | -0.0012666 |
| HIPK3   | -0.0012662 |
| TSN     | 0.00126517 |
| UBAP2   | 0.0012638  |
| SUGT1   | -0.0012592 |
| RIC3    | 0.00125433 |

|          |            |
|----------|------------|
| THOC1    | -0.0012533 |
| USP39    | 0.00124976 |
| AHCYL1   | 0.00124879 |
| DLX6     | -0.0012466 |
| TMEM111  | -0.0012457 |
| PSMD6    | 0.00124525 |
| FAM125A  | 0.00124468 |
| SH2B3    | 0.00124454 |
| SPEF2    | 0.00124157 |
| MCC      | 0.00124083 |
| PTK2     | 0.00124066 |
| LMBRD1   | -0.0012406 |
| GALNT12  | -0.0012404 |
| SLC3A2   | 0.0012385  |
| UBA1     | -0.0012382 |
| TUBGCP5  | -0.0012374 |
| E2F4     | 0.00123469 |
| E2F8     | -0.0012326 |
| SLC19A2  | -0.0012298 |
| ALKBH1   | 0.00122862 |
| ARFIP1   | 0.00122764 |
| RCSD1    | 0.00122655 |
| CANT1    | 0.00122396 |
| SLC35E3  | -0.0012237 |
| ABCC1    | 0.00122362 |
| IP6K1    | -0.0012219 |
| SPATA7   | -0.0012208 |
| TTC39B   | 0.00122049 |
| PARN     | -0.0012198 |
| RPL23A   | 0.00121977 |
| SMEK1    | 0.00121932 |
| PTPN1    | 0.00121776 |
| FAM83D   | 0.00121689 |
| ANKRD52  | 0.00121361 |
| C2CD2L   | 0.00121308 |
| FKBP2    | -0.0012105 |
| EEF2K    | 0.0012096  |
| MRPL49   | -0.0012095 |
| SLC38A10 | -0.0012087 |
| AMPD3    | 0.00120853 |
| FKBP10   | 0.0012075  |
| MOB1B    | -0.0012066 |

|           |            |
|-----------|------------|
| WDR48     | 0.00120607 |
| TSKU      | -0.001206  |
| GINS4     | -0.0012048 |
| PNPO      | 0.00120396 |
| RABL5     | 0.00119934 |
| IDH1      | -0.0011986 |
| CMPK1     | -0.0011971 |
| RAB31     | 0.00119601 |
| VEZT      | -0.0011951 |
| RAB11FIP4 | -0.0011945 |
| ANKRD42   | 0.00119012 |
| MRPL17    | 0.00118931 |
| PPT1      | 0.00118885 |
| FAM123B   | -0.0011887 |
| SNRNP27   | -0.001186  |
| TSPAN14   | 0.00118498 |
| OGFOD1    | -0.0011845 |
| UXS1      | 0.00118195 |
| GNA12     | -0.0011809 |
| CYBASC3   | -0.0011784 |
| SLC35E1   | 0.00117794 |
| NIT2      | -0.0011764 |
| UBE2O     | -0.0011739 |
| SHARPIN   | -0.001173  |
| PRKACB    | -0.0011714 |
| FBXL5     | 0.00116929 |
| DPM1      | 0.00116791 |
| ANKRD13C  | 0.00116739 |
| PPP4R1    | -0.0011652 |
| FAM89A    | -0.0011571 |
| KPNA3     | -0.001156  |
| SNX22     | -0.0011526 |
| DHTKD1    | 0.00115221 |
| WDR33     | 0.00115126 |
| MYO19     | 0.0011502  |
| FBF1      | -0.0011495 |
| MCTP1     | -0.0011492 |
| SAP30     | -0.0011472 |
| PPP2R2A   | -0.001145  |
| GPR98     | -0.0011444 |
| FKTN      | -0.0011444 |
| DOCK7     | -0.0011442 |

|           |            |
|-----------|------------|
| VAMP1     | 0.00114313 |
| PCNP      | 0.00114302 |
| TCTEX1D2  | -0.0011415 |
| RPL26     | 0.00114056 |
| PARG      | -0.001137  |
| CYBB      | -0.0011369 |
| USP24     | 0.00113606 |
| ATP5B     | 0.00113601 |
| TMEM209   | -0.0011344 |
| TFPI      | -0.0011292 |
| RASL11B   | -0.001129  |
| PIGP      | 0.00112838 |
| TIAM2     | -0.0011263 |
| SPG20     | -0.0011241 |
| POLG      | -0.0011227 |
| NUF2      | 0.00112065 |
| CLK3      | 0.00112055 |
| RRAGC     | -0.0011198 |
| ATOX1     | 0.00111902 |
| PLAA      | 0.00111872 |
| GTPBP2    | -0.0011182 |
| PRSS12    | -0.0011178 |
| INTS9     | -0.0011159 |
| SLC43A3   | 0.00111542 |
| LINS      | -0.0011135 |
| SPTLC1    | 0.00111343 |
| TOR1AIP2  | -0.0011126 |
| PRPF4     | 0.00111227 |
| KLF13     | 0.00111224 |
| STX12     | -0.0011119 |
| USP54     | 0.00111166 |
| ST6GAL1   | -0.0011102 |
| ATL2      | 0.00111003 |
| GABARAPL1 | -0.0011089 |
| SLC26A11  | -0.0011081 |
| USP19     | -0.0011076 |
| SNW1      | 0.0011075  |
| BAIAP2L1  | 0.00110561 |
| SIN3A     | -0.0011045 |
| FMR1      | 0.00110435 |
| RAMP2     | -0.0011042 |
| ABHD2     | -0.0010969 |

|         |            |
|---------|------------|
| TBC1D1  | 0.00109653 |
| DOT1L   | 0.00109295 |
| IL20RB  | 0.00108946 |
| TEX2    | -0.0010892 |
| UBXN2A  | -0.0010861 |
| REPIN1  | -0.0010831 |
| LPGAT1  | 0.00108143 |
| SF1     | -0.0010813 |
| PACSIN2 | 0.00108015 |
| BRD9    | -0.0010773 |
| NAGA    | -0.0010746 |
| AIFM1   | -0.0010746 |
| NNT     | -0.0010725 |
| PSPC1   | 0.00106777 |
| MORF4L1 | 0.00106553 |
| BLVRA   | -0.0010641 |
| PDE8A   | 0.00106343 |
| ARSG    | -0.0010632 |
| SMURF2  | -0.0010618 |
| CDV3    | 0.00106096 |
| DBR1    | 0.00106093 |
| NCALD   | 0.00105778 |
| RLTPR   | -0.0010576 |
| OGDH    | 0.0010575  |
| SMAD1   | -0.0010547 |
| SF3A3   | -0.0010532 |
| GNAI2   | 0.00105261 |
| IFI30   | -0.0010522 |
| NPEPL1  | 0.00105214 |
| BCL10   | -0.001052  |
| MCCC2   | -0.0010493 |
| CARD10  | 0.00104923 |
| ABI2    | -0.0010471 |
| PABPC1L | 0.00104398 |
| APOOL   | -0.0010422 |
| EIF2B4  | 0.00104104 |
| PRKD1   | -0.0010392 |
| SLC35C2 | 0.00103721 |
| MED16   | 0.0010371  |
| FIGNL1  | 0.001036   |
| ANAPC4  | 0.00102811 |
| ABTB2   | -0.0010255 |

|           |            |
|-----------|------------|
| UCHL1     | 0.00102393 |
| FAM188A   | 0.00102373 |
| LATS2     | -0.0010231 |
| TXNL1     | 0.00102232 |
| DNAJC25   | 0.00101782 |
| TMEM161B  | -0.0010177 |
| H2AFY     | 0.00101728 |
| HNRNPR    | -0.0010171 |
| PFDN5     | -0.0010157 |
| ADK       | 0.00101538 |
| FAM178A   | 0.00101374 |
| DMRTA1    | 0.00101346 |
| CKS1B     | -0.0010089 |
| TRMT5     | 0.00100505 |
| TAF11     | -0.0010044 |
| PIP5K1A   | -0.0010042 |
| CREB1     | -0.0010027 |
| CLCN5     | -0.0010024 |
| CCRL1     | 0.00099992 |
| GLMN      | -0.0009945 |
| HSF2      | -0.0009941 |
| NSA2      | 0.00099291 |
| NEK4      | 0.00098962 |
| GDPD5     | 0.0009892  |
| DHX15     | -0.000989  |
| NRBF2     | -0.0009875 |
| MYH10     | -0.0009856 |
| NUP88     | 0.00098563 |
| FAM20B    | -0.0009818 |
| USP8      | 0.0009816  |
| ABCC10    | 0.00098054 |
| CASC3     | 0.00098047 |
| CTCF      | -0.0009803 |
| BBS9      | 0.00098016 |
| PGM1      | -0.0009762 |
| LIFR      | 0.00097526 |
| TMEM66    | -0.0009747 |
| HNRNPA2B1 | 0.00097461 |
| SENP8     | -0.0009738 |
| ALPK3     | -0.0009699 |
| FAM65B    | -0.0009696 |
| RNF145    | -0.0009663 |



|         |            |
|---------|------------|
| VANGL2  | 0.00096626 |
| SUZ12   | 0.00096373 |
| ROR1    | -0.0009613 |
| SLC35C1 | -0.0009607 |
| GPR116  | 0.00096023 |
| YIF1A   | 0.00095974 |
| U2AF1   | -0.0009587 |
| RPF1    | 0.00095494 |
| FBXW11  | -0.0009527 |
| PRKAR2B | 0.00095235 |
| FAM82A2 | -0.0009498 |
| INTS10  | 0.00094957 |
| MNS1    | 0.00094815 |
| PMCH    | -0.0009479 |
| DDX20   | -0.0009478 |
| UGDH    | 0.00094545 |
| SBF2    | -0.000945  |
| TMEM104 | 0.0009448  |
| FAM116B | -0.0009441 |
| LMNB1   | 0.00093562 |
| INTS12  | 0.0009335  |
| ARF6    | -0.0009309 |
| SPON2   | -0.0009294 |
| ALS2CL  | 0.00092925 |
| PPP1R2  | 0.00092886 |
| FOXO4   | -0.0009283 |
| TPR     | 0.00092692 |
| ACSL3   | -0.0009261 |
| CARKD   | 0.00092275 |
| SHPRH   | -0.0009223 |
| TMUB2   | -0.0009218 |
| BEGAIN  | 0.00092138 |
| DAPK1   | -0.00092   |
| SEMA4C  | 0.00091949 |
| SLC38A6 | 0.00091869 |
| CCDC93  | 0.00091728 |
| PARP16  | 0.00091592 |
| SLC16A4 | -0.0009155 |
| TMEM128 | -0.0009149 |
| BTF3L4  | -0.0009142 |
| ZZZ3    | 0.00091189 |
| MAN1C1  | 0.00091117 |

|           |            |
|-----------|------------|
| PTP4A3    | 0.00090854 |
| KBTBD4    | 0.00090726 |
| AIP       | 0.00090457 |
| IARS2     | 0.00090441 |
| TMEM50A   | 0.00090334 |
| RAB35     | -0.0009023 |
| INTS4     | 0.00090115 |
| ODF2L     | -0.0009005 |
| TMEM158   | -0.0009005 |
| LRRC49    | -0.0008991 |
| PPP1R3C   | -0.0008979 |
| LAMP1     | -0.0008952 |
| PAPD7     | -0.0008923 |
| GPRC5C    | 0.00089199 |
| EML1      | -0.0008903 |
| MAPK1IP1L | -0.0008896 |
| HTT       | -0.0008888 |
| TTC26     | 0.00088813 |
| WDR67     | 0.00088721 |
| CDK7      | 0.0008852  |
| NUDT19    | 0.00088503 |
| BICD2     | -0.0008846 |
| SOX18     | -0.0008836 |
| NCAPH2    | -0.0008802 |
| VPS54     | -0.0008799 |
| TINF2     | 0.00087873 |
| LIG4      | -0.000878  |
| REV1      | 0.00087702 |
| NUDCD3    | -0.000877  |
| MAGT1     | 0.00087472 |
| ATP2B1    | 0.00087204 |
| INTS8     | -0.0008718 |
| UBA5      | -0.0008716 |
| SASH3     | 0.0008711  |
| LMTK2     | -0.0008704 |
| LEPREL4   | 0.00086982 |
| LRRC40    | -0.0008696 |
| PDPK1     | 0.00086836 |
| PDE7A     | 0.00086819 |
| ZGPAT     | -0.0008653 |
| VRK2      | 0.00086337 |
| THOC3     | -0.0008597 |

|           |            |
|-----------|------------|
| MAFG      | -0.0008578 |
| DLST      | 0.00085469 |
| BACH2     | 0.00085206 |
| ATG5      | -0.0008512 |
| SENP5     | 0.00084621 |
| PFDN1     | -0.0008461 |
| MMP15     | -0.0008455 |
| ATP7B     | -0.0008422 |
| TSG101    | -0.0008419 |
| AEBP1     | -0.0008373 |
| NOA1      | 0.00083711 |
| MAPK8IP3  | -0.0008364 |
| MAP3K4    | 0.00083531 |
| PPA2      | 0.00083419 |
| SPTLC2    | -0.0008338 |
| ST3GAL4   | -0.0008321 |
| MGA       | 0.00083013 |
| UBXN2B    | -0.0008292 |
| ACP2      | 0.00082914 |
| POLR2G    | -0.0008269 |
| DGKD      | 0.00082599 |
| PRR5L     | -0.0008256 |
| METTTL21A | -0.0008255 |
| TSPAN13   | -0.0008214 |
| NSMAF     | 0.00082014 |
| AGPAT4    | -0.0008189 |
| PKN1      | 0.0008185  |
| VAR52     | -0.0008178 |
| ZDHHC15   | -0.0008161 |
| PLIN2     | 0.00081588 |
| MPG       | 0.0008158  |
| UNC45A    | 0.00081489 |
| EXOSC10   | -0.0008144 |
| PIK3C3    | 0.00080939 |
| TMEM216   | 0.0008084  |
| MAPK7     | -0.0008055 |
| RBFOX3    | -0.0008054 |
| INHA      | 0.00080374 |
| MFSD9     | -0.0008022 |
| NCAPG     | -0.0007998 |
| MDM2      | 0.0007973  |
| RASAL2    | 0.00079561 |

|          |            |
|----------|------------|
| IPMK     | -0.0007953 |
| UBE2Z    | -0.0007942 |
| CNOT1    | 0.00079396 |
| PLEKHA3  | -0.0007937 |
| GNPTG    | 0.00079074 |
| SCML2    | -0.0007904 |
| MRPL43   | 0.00079034 |
| RASSF2   | -0.0007901 |
| SRFBP1   | 0.00078777 |
| VAC14    | 0.00078319 |
| PDE4A    | -0.0007814 |
| RBM10    | 0.00078118 |
| PNPLA7   | -0.0007783 |
| LZIC     | 0.00077584 |
| SLC35B2  | 0.00077575 |
| POGLUT1  | -0.0007726 |
| SUSD1    | 0.00076993 |
| PUM1     | -0.0007687 |
| DBI      | 0.00076811 |
| PRDX4    | 0.00076526 |
| GALNT11  | 0.00076391 |
| PDGFA    | 0.0007629  |
| SLC25A21 | -0.0007625 |
| AP2A2    | 0.00076166 |
| DCAF10   | -0.0007589 |
| ATP2C1   | -0.0007587 |
| MPHOSPH6 | 0.0007583  |
| GABPB2   | -0.0007578 |
| ALS2     | 0.00075392 |
| VAV2     | 0.00075376 |
| HOMER2   | -0.0007514 |
| TNFAIP1  | -0.0007504 |
| TADA2A   | 0.00074981 |
| WNK4     | 0.00074949 |
| BOLA3    | -0.0007494 |
| SLC25A3  | -0.0007485 |
| CHD4     | -0.0007483 |
| INTS3    | -0.0007478 |
| RPGR     | 0.00074726 |
| TNFAIP8  | 0.0007456  |
| EEF1B2   | -0.0007429 |
| TRAPPC9  | -0.0007406 |

|          |            |
|----------|------------|
| ARFGEF2  | -0.0007377 |
| ESRRA    | 0.00073519 |
| ACAD8    | -0.0007344 |
| ATP6V1H  | -0.0007318 |
| NT5DC3   | 0.00073125 |
| RNF166   | -0.0007287 |
| XRCC2    | 0.00072846 |
| CEBPD    | -0.0007264 |
| SLC39A11 | -0.0007239 |
| TMEM108  | 0.00071686 |
| STIM2    | -0.0007165 |
| MEX3C    | -0.0007149 |
| VPS41    | 0.00071475 |
| MTO1     | 0.00071078 |
| STXBP6   | -0.000709  |
| BEND7    | 0.00070869 |
| TPCN2    | 0.00070769 |
| GJA4     | 0.00070624 |
| RFNG     | -0.000702  |
| ZDHHC7   | -0.0007017 |
| GYLTL1B  | -0.0007014 |
| CALR     | -0.0007003 |
| LIAS     | -0.0006992 |
| BNIP1    | -0.0006976 |
| PRDM10   | -0.0006971 |
| LRRC3    | -0.0006945 |
| GMEB2    | 0.0006932  |
| CYGB     | 0.00069291 |
| YIPF6    | 0.00069129 |
| RNF141   | -0.0006907 |
| SOX12    | 0.00068976 |
| PITPNB   | 0.00068646 |
| SPCS2    | 0.0006801  |
| RDM1     | -0.0006774 |
| ALMS1    | -0.0006771 |
| RPL12    | -0.0006742 |
| RHBDD3   | -0.0006719 |
| RBCK1    | 0.00066986 |
| QARS     | 0.0006687  |
| CDC14A   | -0.0006687 |
| KIF11    | 0.00066534 |
| PPP2R1A  | 0.00066532 |

|          |            |
|----------|------------|
| MRPS21   | 0.00066416 |
| HAX1     | -0.0006635 |
| SLC41A1  | 0.00065949 |
| PHF6     | 0.00065787 |
| PPP2CB   | -0.0006556 |
| NCKAP5L  | 0.00065513 |
| TRIM59   | -0.0006546 |
| PRKAG1   | 0.00065415 |
| CCDC114  | -0.0006531 |
| MED1     | 0.00064858 |
| PTPLB    | 0.00064765 |
| EFS      | 0.00064655 |
| MON1A    | -0.0006465 |
| TSPAN3   | 0.00064569 |
| ZBTB11   | -0.0006456 |
| RFK      | -0.0006456 |
| SEC23A   | -0.0006451 |
| AGPS     | 0.00064414 |
| SEPHS1   | 0.00064126 |
| ZBTB39   | 0.00064049 |
| CD164    | -0.0006401 |
| GTF3C2   | -0.0006388 |
| CELF1    | 0.00063847 |
| SIL1     | 0.00063839 |
| ADRBK1   | 0.00063644 |
| FAM96A   | -0.0006344 |
| G2E3     | 0.00063229 |
| SMARCAL1 | -0.0006319 |
| UBE2J1   | -0.0006308 |
| MAP2K6   | 0.0006304  |
| SYNJ2BP  | -0.0006304 |
| FBXO45   | 0.00062944 |
| TMEM80   | 0.00062925 |
| PPM1K    | 0.00062721 |
| CBX5     | 0.00062692 |
| UBXN1    | 0.0006232  |
| CCNK     | -0.0006221 |
| DOCK4    | -0.0006221 |
| GLS      | 0.00062123 |
| AK2      | -0.0006199 |
| COG3     | 0.00061976 |
| TDRKH    | 0.0006183  |

|         |            |
|---------|------------|
| ATM     | 0.00061372 |
| MTF1    | -0.0006129 |
| LMAN2L  | -0.0006125 |
| CTPS2   | -0.0006123 |
| APLP2   | -0.0006115 |
| CYLD    | -0.0006109 |
| BNC1    | -0.0006097 |
| TMEM55B | -0.0006089 |
| SMPD4   | -0.0006084 |
| GRAMD1A | -0.0006055 |
| UBE3B   | -0.0006053 |
| CDC5L   | -0.0006029 |
| PRRG1   | -0.000598  |
| RAVER2  | 0.00059691 |
| STIL    | -0.0005956 |
| THBS3   | 0.0005955  |
| NOP56   | -0.0005945 |
| GALNT14 | 0.00059374 |
| MTA2    | 0.00059183 |
| TULP3   | 0.00059051 |
| MAP4K4  | -0.0005902 |
| DNAJC27 | 0.0005898  |
| GAS2L1  | 0.00058892 |
| AP3M1   | 0.0005882  |
| SLC2A8  | -0.0005881 |
| BIVM    | 0.00058629 |
| STARD7  | -0.0005829 |
| SESTD1  | 0.00058129 |
| KDM2B   | -0.0005808 |
| PPP2R2D | 0.00057979 |
| GPKOW   | 0.0005795  |
| FAM161B | -0.0005791 |
| SERBP1  | -0.0005769 |
| KEAP1   | -0.0005759 |
| MTMR12  | -0.0005749 |
| FAM194A | -0.0005723 |
| SP2     | -0.0005718 |
| SLC7A7  | 0.00057154 |
| REP15   | 0.00056901 |
| SCAMP3  | 0.00056848 |
| RNGTT   | 0.00056834 |
| MARK3   | -0.000566  |

|         |            |
|---------|------------|
| FBXO7   | 0.00056584 |
| SMC1A   | -0.0005591 |
| MAPK1   | 0.00055903 |
| DHX16   | 0.00055771 |
| HSP90B1 | 0.00055553 |
| NFIL3   | 0.00055344 |
| UTP11L  | -0.0005524 |
| DNAJC30 | -0.0005508 |
| ABHD10  | 0.00054855 |
| KRAS    | 0.00054771 |
| RBM12B  | -0.000547  |
| FASTK   | 0.00054665 |
| CUL7    | 0.00054482 |
| DDX42   | 0.00054474 |
| PTMA    | -0.0005437 |
| TMEM39B | -0.0005434 |
| EEPD1   | -0.0005412 |
| EXOC3   | -0.0005404 |
| LRRC8B  | 0.0005378  |
| ESYT3   | -0.0005367 |
| WIPI1   | -0.000536  |
| ESCO2   | 0.00053602 |
| CTBS    | 0.00053594 |
| COPS4   | -0.0005356 |
| KLHL18  | 0.00053559 |
| KIF24   | 0.0005341  |
| EHMT1   | 0.00053234 |
| EDEM1   | -0.0005311 |
| ZC3H12C | -0.0005307 |
| SGSM3   | 0.00052852 |
| NPC2    | 0.00052841 |
| NRIP1   | 0.00052827 |
| TOP1    | -0.0005281 |
| AMZ2    | 0.00052715 |
| TRA2A   | 0.00052653 |
| SYMPK   | -0.0005226 |
| PTPLAD1 | -0.0005213 |
| PRPF38A | -0.0005194 |
| TRUB2   | 0.00051826 |
| EI24    | -0.0005158 |
| MSH3    | 0.00051396 |
| PHF13   | -0.000513  |



|         |            |
|---------|------------|
| IL6ST   | -0.0005091 |
| DECR1   | -0.0005089 |
| UHRF1   | 0.00050776 |
| CCDC6   | -0.0005052 |
| CCBL2   | -0.0005038 |
| BMF     | 0.00050257 |
| ACLY    | -0.0005015 |
| RAB22A  | -0.0005002 |
| PLEKHH1 | -0.0004999 |
| TONSL   | -0.0004962 |
| NLRX1   | -0.0004935 |
| UIMC1   | -0.0004915 |
| BZW2    | 0.00049117 |
| GDE1    | -0.0004906 |
| DLD     | -0.0004877 |
| EIF2A   | 0.00048547 |
| UBTD2   | 0.00048427 |
| MASTL   | 0.00048384 |
| CTU2    | -0.0004822 |
| RPLP0   | 0.00047972 |
| ST3GAL5 | -0.0004784 |
| ENTPD5  | -0.0004776 |
| COMMD8  | -0.0004773 |
| INO80   | -0.0004764 |
| KCMF1   | -0.0004747 |
| TAF10   | 0.00047259 |
| SCOC    | 0.00047237 |
| SNRPC   | 0.00047168 |
| PDCD10  | 0.0004715  |
| PARP2   | -0.0004691 |
| LYRM7   | -0.0004687 |
| HSPA4L  | -0.0004666 |
| DFNA5   | 0.00046537 |
| CDC25B  | -0.0004644 |
| TMEM177 | 0.00046303 |
| MIDN    | 0.00046208 |
| RTF1    | -0.000462  |
| FIG4    | -0.0004607 |
| LYSMD2  | 0.00045997 |
| RPL30   | -0.0004586 |
| DNAJC18 | 0.00045772 |
| ENO3    | 0.00045622 |

|          |            |
|----------|------------|
| HES6     | 0.00045455 |
| LRRTM1   | -0.0004505 |
| HMGB1    | -0.0004504 |
| CNOT2    | -0.0004482 |
| UTP3     | 0.00044758 |
| FAM199X  | 0.00044288 |
| PECR     | 0.00044184 |
| KDELR1   | 0.00044076 |
| OSTM1    | 0.00043881 |
| SIRT2    | -0.0004386 |
| ZDHHC17  | -0.0004385 |
| CLCN6    | -0.000438  |
| NR1D1    | 0.00043623 |
| MAP3K7   | -0.0004362 |
| VAMP3    | -0.0004352 |
| SLU7     | -0.0004336 |
| BTBD9    | -0.0004333 |
| SLC39A6  | 0.0004313  |
| TMOD3    | -0.0004307 |
| ANKRD13D | 0.00042944 |
| RSRC1    | 0.00042537 |
| TRPC6    | 0.00042453 |
| MYO1B    | -0.0004241 |
| USP12    | -0.0004237 |
| ORMDL1   | 0.00042236 |
| UBE2E1   | 0.00042235 |
| TECPR2   | 0.00042065 |
| IPP      | 0.00041674 |
| PIK3R4   | 0.0004159  |
| DDRKG1   | -0.0004148 |
| AGGF1    | -0.0004111 |
| ADCK2    | -0.0004108 |
| XRCC5    | -0.0004107 |
| ANKRD29  | -0.0004105 |
| GPLD1    | -0.0004082 |
| GHITM    | 0.00040696 |
| ACADSB   | -0.000406  |
| AP4E1    | 0.00040407 |
| SUGP2    | 0.00040211 |
| FSIP1    | 0.00040114 |
| FAM109A  | 0.00039949 |
| ING3     | 0.00039782 |

|         |            |
|---------|------------|
| LSMD1   | 0.000396   |
| KSR1    | -0.0003953 |
| LYSMD4  | -0.0003947 |
| LRRC32  | -0.0003944 |
| VAMP4   | -0.0003883 |
| MLXIP   | 0.00038777 |
| ADAMTS1 | -0.0003858 |
| PSKH1   | 0.00038544 |
| HINFP   | 0.00038353 |
| DENND2A | -0.0003833 |
| MTMR9   | 0.00038163 |
| ZFAND1  | -0.0003805 |
| TTLL13  | 0.00037652 |
| GPSM2   | 0.00037165 |
| NADK    | -0.0003688 |
| BTBD1   | -0.0003648 |
| PRKAR2A | 0.00036239 |
| UQCRB   | -0.0003586 |
| SYK     | 0.00035721 |
| DDX27   | 0.00035704 |
| ERO1LB  | 0.00035678 |
| DGKE    | -0.0003566 |
| IKZF1   | 0.00035541 |
| AGA     | 0.00034998 |
| ISCA1   | 0.0003499  |
| UBA2    | 0.00034763 |
| ISCA2   | -0.0003412 |
| SETD1A  | -0.0003377 |
| KDM1B   | -0.000337  |
| FARP2   | -0.0003361 |
| TNK2    | -0.000336  |
| FARS2   | 0.00033568 |
| TBPL1   | 0.00033563 |
| SLC25A1 | 0.00033339 |
| ALYREF  | -0.0003301 |
| FERMT2  | 0.000328   |
| ASPM    | 0.00032442 |
| CCDC126 | -0.0003238 |
| PFKP    | 0.00032311 |
| ZCCHC2  | -0.0003216 |
| HIF1AN  | 0.00032015 |
| FBLN1   | 0.00031947 |

|          |            |
|----------|------------|
| NIPA2    | -0.0003178 |
| RAB8B    | 0.00030788 |
| ZFYVE27  | 0.00030739 |
| INPP5D   | -0.0003058 |
| PAF1     | -0.000304  |
| LEMD2    | -0.0003037 |
| ICT1     | 0.00030317 |
| LRRFIP1  | -0.0003029 |
| ENG      | 0.00030262 |
| SERPINH1 | 0.00030245 |
| EIF4A3   | -0.0002984 |
| PRKCSH   | -0.0002966 |
| NSMCE2   | -0.0002946 |
| EMB      | 0.00029284 |
| SNX11    | 0.00029282 |
| TMEM62   | 0.00029187 |
| POLG2    | 0.00028922 |
| ELMOD3   | -0.000284  |
| WDR35    | 0.00028395 |
| PRRC2C   | -0.0002825 |
| REXO2    | -0.000278  |
| LRRC56   | 0.00027464 |
| CIT      | -0.000272  |
| SLC9A8   | -0.0002701 |
| BCAP31   | -0.0002693 |
| ACTR8    | -0.0002693 |
| ORMDL3   | 0.00026795 |
| NKIRAS2  | -0.000266  |
| KANK1    | -0.0002657 |
| MYL6     | -0.0002648 |
| FKBP9    | 0.00026235 |
| HDHD2    | -0.0002594 |
| MID1     | 0.00025821 |
| EZH2     | -0.0002577 |
| HNRNPAB  | 0.00025253 |
| COPS7A   | 0.00024986 |
| PRMT10   | 0.00024909 |
| TADA2B   | 0.00024846 |
| GPM6A    | 0.00024516 |
| GAS1     | -0.0002406 |
| NAA40    | -0.0002385 |
| GRIPAP1  | -0.0002366 |

|         |            |
|---------|------------|
| SH3BP2  | 0.00023588 |
| TBC1D9B | -0.0002314 |
| HS3ST1  | 0.00022878 |
| DHRX    | 0.00022668 |
| LYPLA1  | 0.00022618 |
| STAM2   | 0.00022244 |
| UBE3C   | 0.00022139 |
| TMEM165 | -0.000221  |
| FAM109B | -0.0002173 |
| PSMD3   | 0.00021091 |
| SRGAP2  | 0.00020976 |
| LMAN1   | -0.0002089 |
| MAPRE2  | -0.0002089 |
| ANKMY2  | -0.0002086 |
| PDK3    | 0.00020644 |
| SNAPC3  | -0.0002033 |
| KPNA1   | 0.00020235 |
| GNG10   | 0.00019946 |
| CCNC    | 0.00019695 |
| DTX3    | 0.00019651 |
| CCDC125 | 0.00019616 |
| SEC62   | 0.00019604 |
| PARP11  | 0.0001942  |
| TRIM37  | 0.0001921  |
| CCDC88C | 0.00019056 |
| TRPC3   | 0.00018933 |
| DOC2A   | 0.00018932 |
| NUP210L | 0.00018858 |
| DMWD    | 0.00018714 |
| HEXB    | -0.0001865 |
| MTR     | -0.000183  |
| PION    | -0.0001828 |
| ATAD1   | -0.0001817 |
| FIZ1    | -0.00018   |
| SLC38A9 | 0.00017757 |
| CRYBG3  | 0.00017642 |
| WDR11   | 0.00017422 |
| MTF2    | 0.00017383 |
| LIN37   | 0.00017302 |
| KLHL20  | -0.000171  |
| SDCBP   | -0.0001694 |
| SIRT5   | -0.0001689 |

|          |            |
|----------|------------|
| RCN1     | 0.00016889 |
| TMEM9B   | -0.0001662 |
| MED19    | -0.0001654 |
| SLC25A46 | -0.0001614 |
| SLIT3    | 0.00015708 |
| PMPCA    | 0.00015403 |
| PLCD4    | -0.0001536 |
| TMEM123  | 0.00015242 |
| RGS19    | -0.0001506 |
| GDPD2    | -0.0001502 |
| HDX      | -0.0001496 |
| LRP5     | -0.0001474 |
| BACH1    | 0.00014653 |
| DOCK6    | -0.0001451 |
| NID2     | -0.0001434 |
| EIF3A    | -0.0001413 |
| TNS1     | 0.0001403  |
| RNF219   | 0.00013934 |
| SLC25A16 | 0.0001373  |
| SEC24A   | 0.00013552 |
| ITCH     | 0.0001316  |
| NHLRC1   | 0.00013105 |
| CPT2     | -0.0001305 |
| STK25    | -0.0001296 |
| SHF      | -0.0001295 |
| CLASP2   | 0.00012696 |
| RFX3     | -0.0001258 |
| IFT57    | 0.00012513 |
| XPC      | 0.00012457 |
| GGCT     | 0.00012145 |
| KBTBD2   | -0.0001206 |
| SOX17    | 0.00011883 |
| CENPP    | 0.00011764 |
| TAB3     | 0.00011698 |
| BCLAF1   | -0.0001112 |
| MEAF6    | -0.0001083 |
| NAA35    | -0.000105  |
| USO1     | -0.0001017 |
| FBXO38   | 9.66E-05   |
| NEK6     | -9.55E-05  |
| ADAMTS2  | -9.08E-05  |
| FAM3C    | -9.07E-05  |

|          |           |
|----------|-----------|
| ARL2BP   | 8.92E-05  |
| E2F6     | -8.51E-05 |
| CYB5R3   | 8.36E-05  |
| GGPS1    | 7.97E-05  |
| SPATA5   | -7.96E-05 |
| AVL9     | 7.79E-05  |
| VPS18    | -7.75E-05 |
| ATP11C   | -7.65E-05 |
| CENPT    | 7.56E-05  |
| TMEM194B | 7.48E-05  |
| BRD7     | -7.20E-05 |
| VPS39    | 7.17E-05  |
| ACOT8    | 7.06E-05  |
| SNTB2    | 7.03E-05  |
| RMI1     | -6.99E-05 |
| CCRN4L   | 6.98E-05  |
| HMG20A   | -6.86E-05 |
| ATP6V1G1 | -6.73E-05 |
| GOLPH3   | 6.68E-05  |
| TMED5    | 6.65E-05  |
| SUPT3H   | -6.57E-05 |
| PARP6    | 6.42E-05  |
| SLC1A3   | -6.20E-05 |
| WRN      | -5.98E-05 |
| KIF21B   | 5.95E-05  |
| COPB2    | 5.92E-05  |
| JMJD8    | -5.90E-05 |
| SRP72    | -5.87E-05 |
| MBD6     | -5.75E-05 |
| ACTR10   | -5.61E-05 |
| KAT5     | -5.36E-05 |
| CBX1     | -5.36E-05 |
| PDE4DIP  | 5.36E-05  |
| SRPR     | -5.16E-05 |
| NDRG3    | -4.78E-05 |
| DYNC2LI1 | 4.74E-05  |
| NFYB     | -4.54E-05 |
| MXRA8    | 4.48E-05  |
| ESAM     | -4.33E-05 |
| CSDE1    | 4.32E-05  |
| MAP2K2   | 4.17E-05  |
| BMP2K    | -4.03E-05 |

|          |           |
|----------|-----------|
| TMCO3    | -3.64E-05 |
| GAMT     | 3.51E-05  |
| CDC26    | -3.45E-05 |
| SOCS7    | -3.43E-05 |
| NUDC     | -3.42E-05 |
| COMMD9   | 3.21E-05  |
| MND1     | 3.00E-05  |
| TM2D3    | 2.99E-05  |
| SWI5     | 2.93E-05  |
| IKBKG    | 2.81E-05  |
| PPM1M    | -2.50E-05 |
| PHOSPHO2 | -2.47E-05 |
| PSMD5    | -2.42E-05 |
| ABCD4    | 2.41E-05  |
| AEBP2    | -1.90E-05 |
| GOT2     | -1.85E-05 |
| TRIM28   | -1.78E-05 |
| GBE1     | -1.71E-05 |
| BET1     | -1.00E-05 |
| IRAK1    | -9.33E-06 |
| BCAT2    | 8.71E-06  |
| LRRC3B   | -8.41E-06 |
| SNX10    | 8.14E-06  |
| GPHN     | 6.37E-06  |
| GSTP1    | -5.09E-06 |
| GABPA    | 3.80E-06  |
| CAMK1G   | 3.20E-06  |
| OTUD5    | 2.44E-06  |
| CCDC130  | 2.13E-06  |
| PTER     | -1.72E-06 |
| FUT10    | 8.79E-07  |
| CCNT2    | -7.00E-07 |
| PKNOX1   | -3.94E-07 |
| STARD3NL | 3.21E-07  |

**Supplementary Table 1.** List of orthologous genes between mouse and anole employed for GO-term analysis. Genes are ordered according to their absolute loading value from principal component analysis (see Fig. 3e), for principal component 2 (PC2), and top 500 genes (in bold, see Fig. 3f) were used for GO-term enrichment analysis.
